# Supplementary material for: Targeting histone deacetylase 6 (HDAC6) to enhance radiation therapy in meningiomas in a 2D and 3D in vitro study
Source: PubMed Central journal article supplement — eBioMedicine. 2024 Jun 24;105:105211. doi: 10.1016/j.ebiom.2024.105211 (PMC11255518; doi:10.1016/j.ebiom.2024.105211), 2024-06-24

Figure 1

a

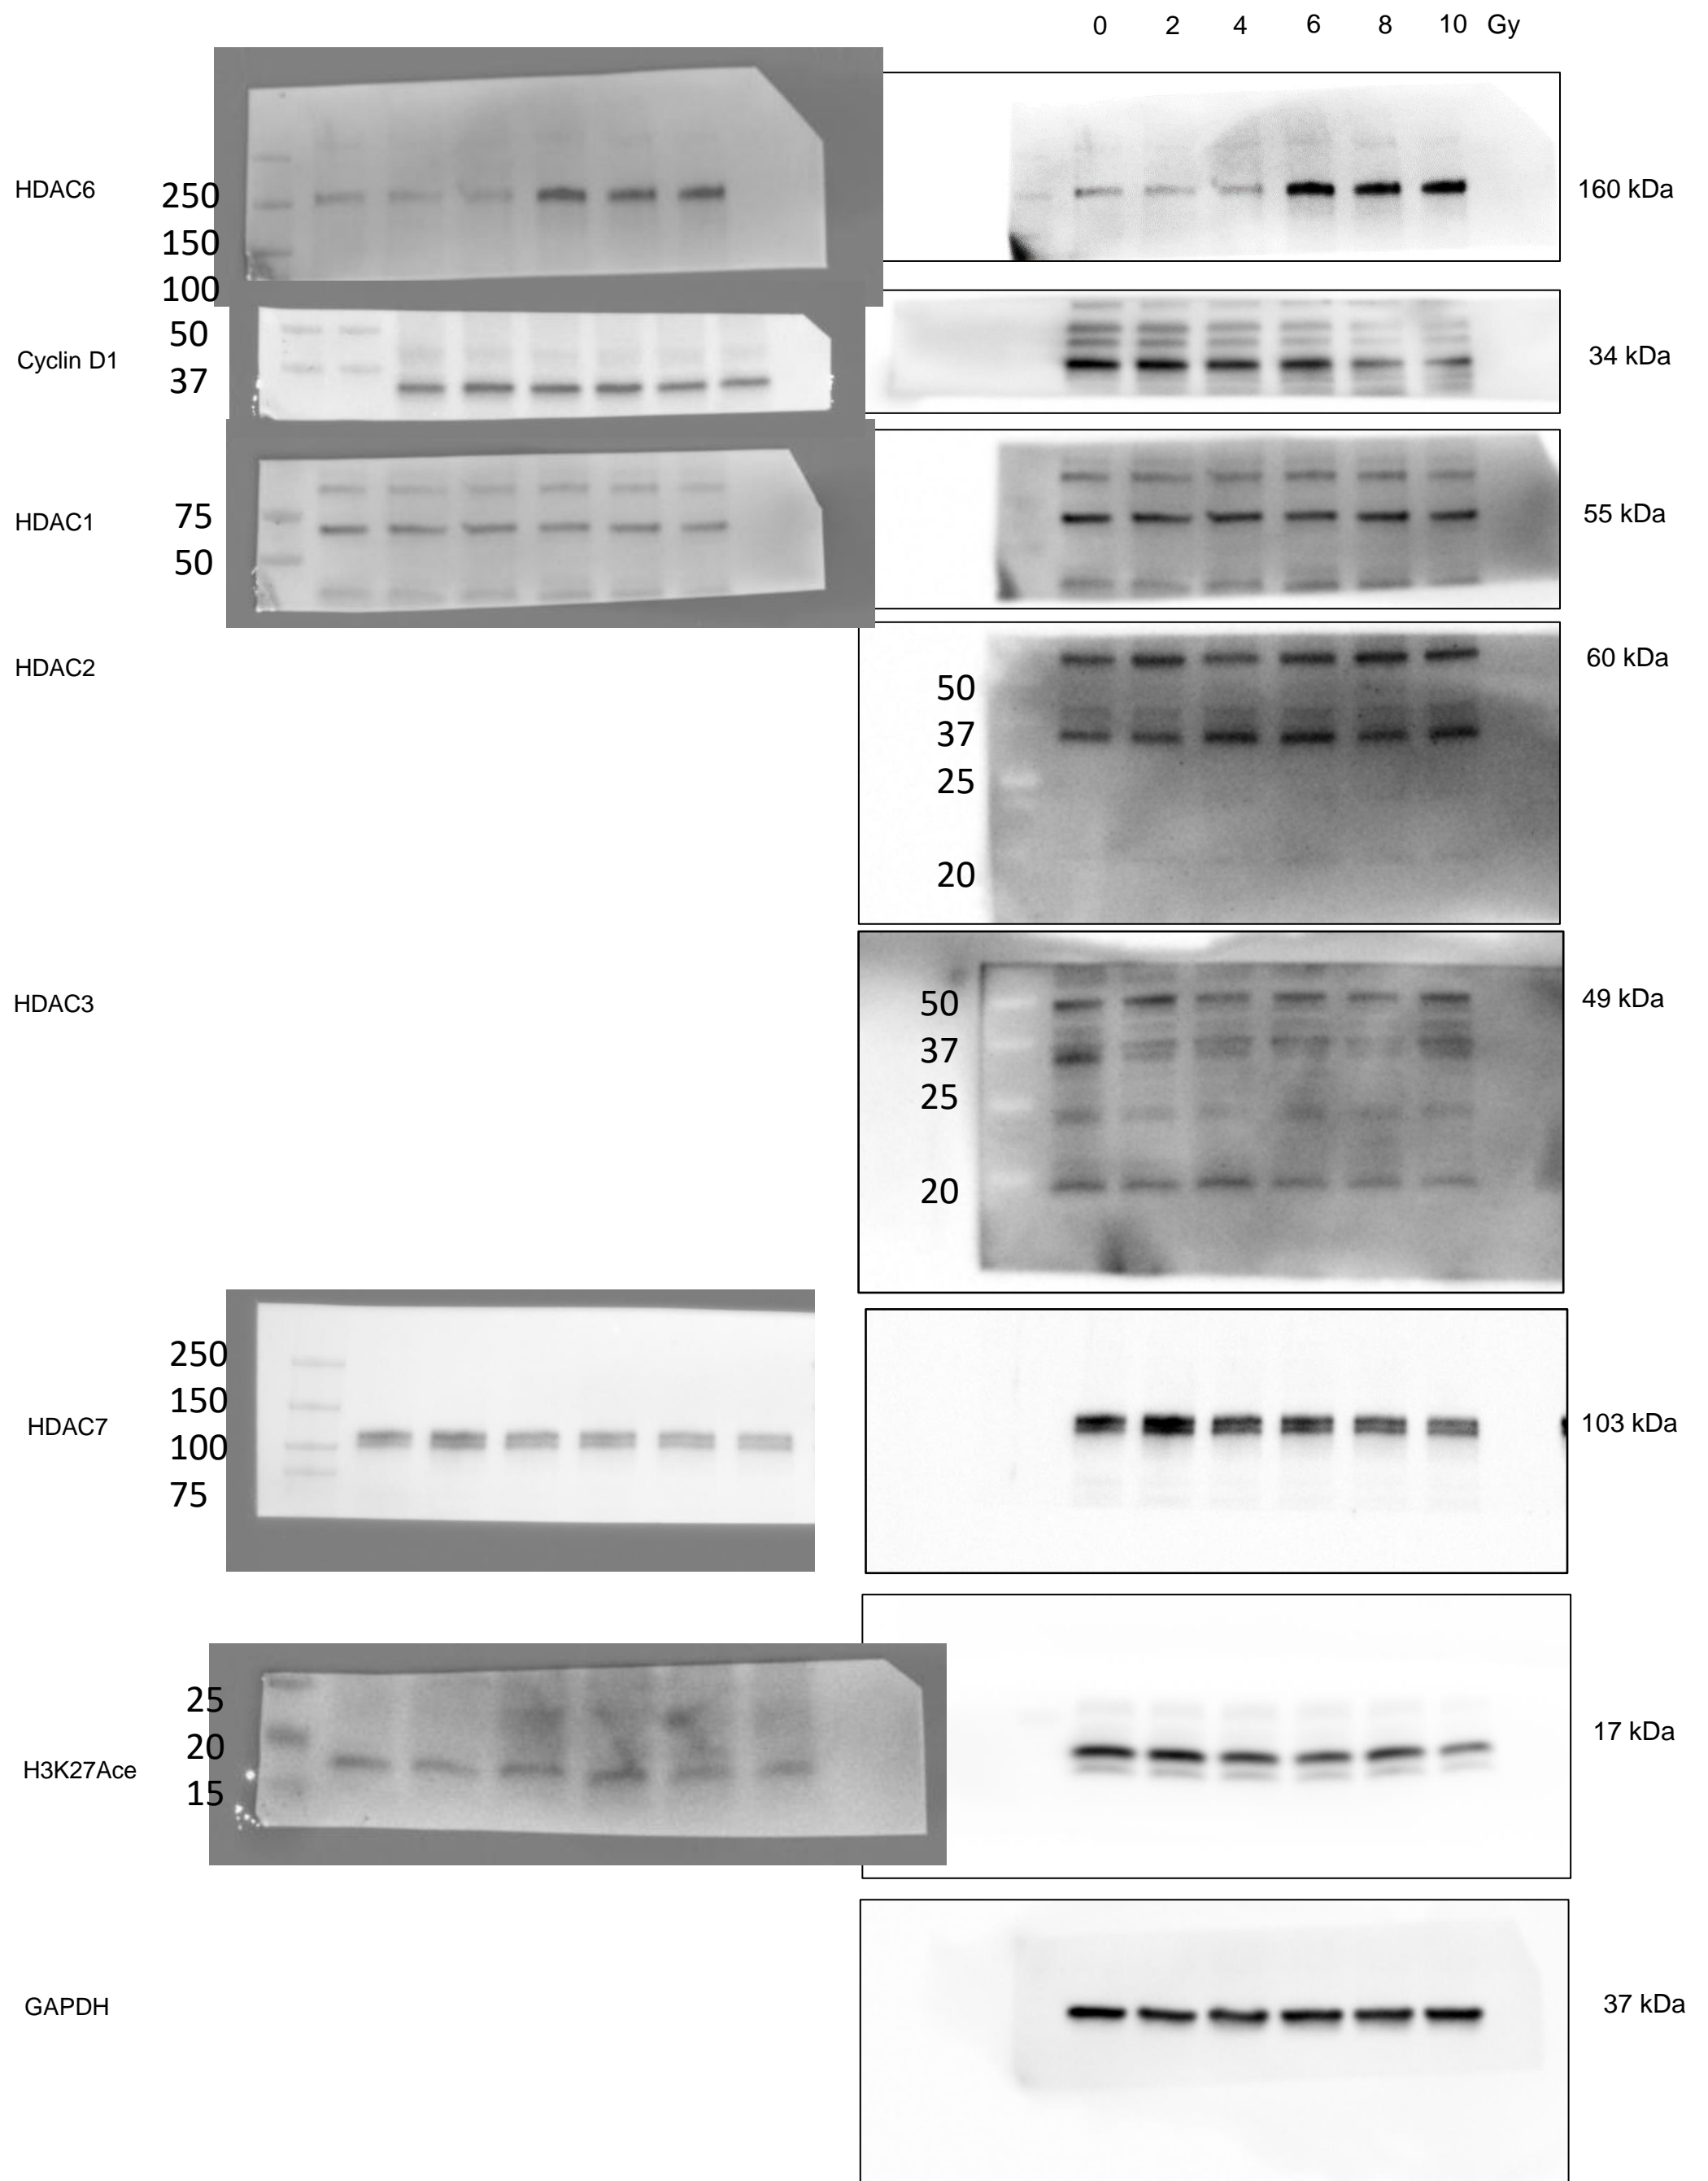

Figure 1

c

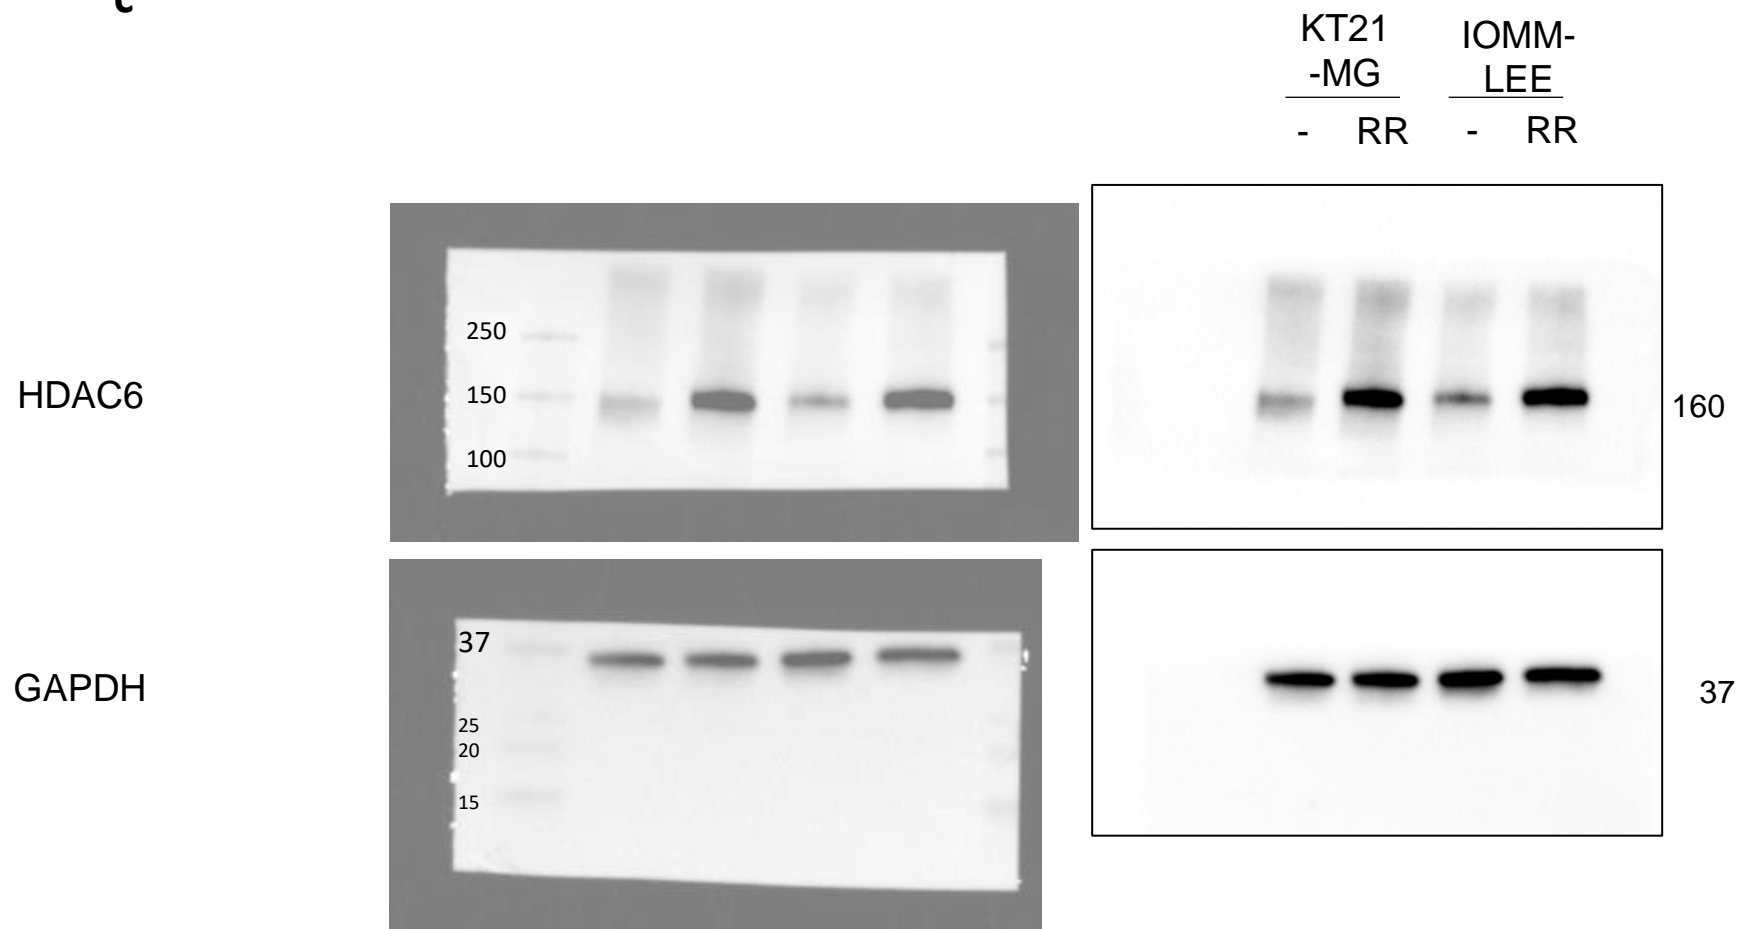

f The markers are continued in the next page

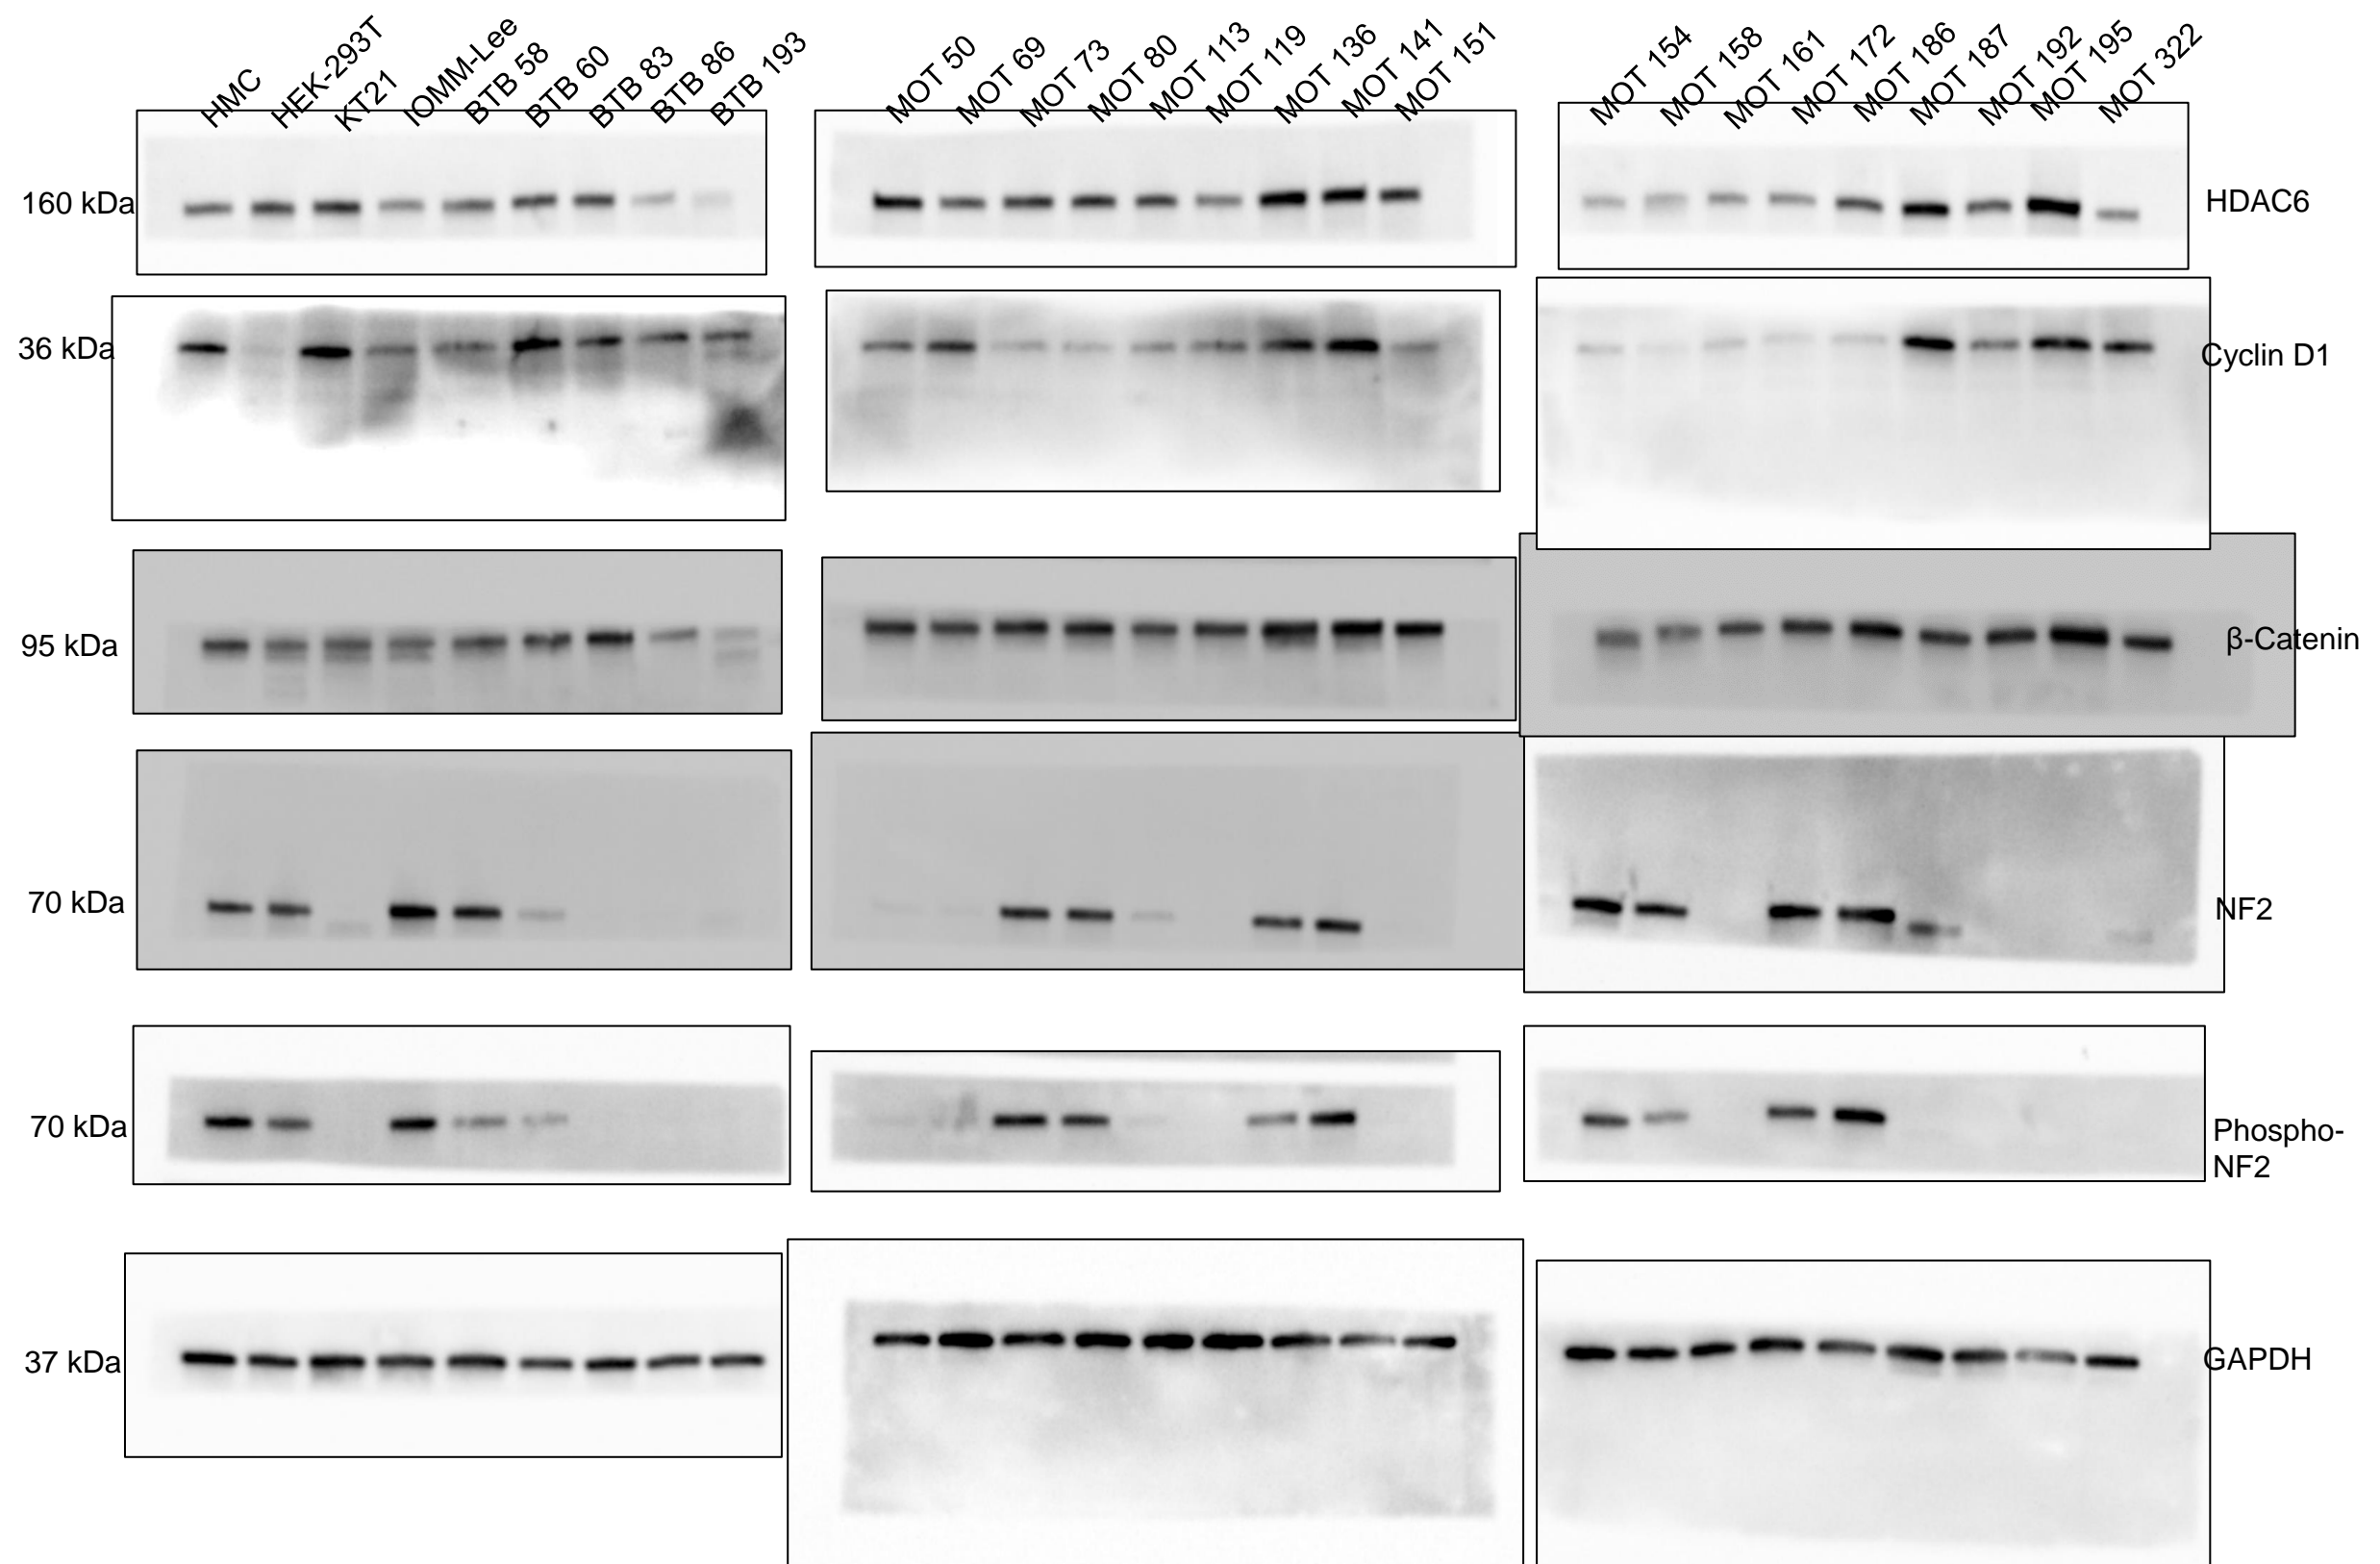

Figure 1

f

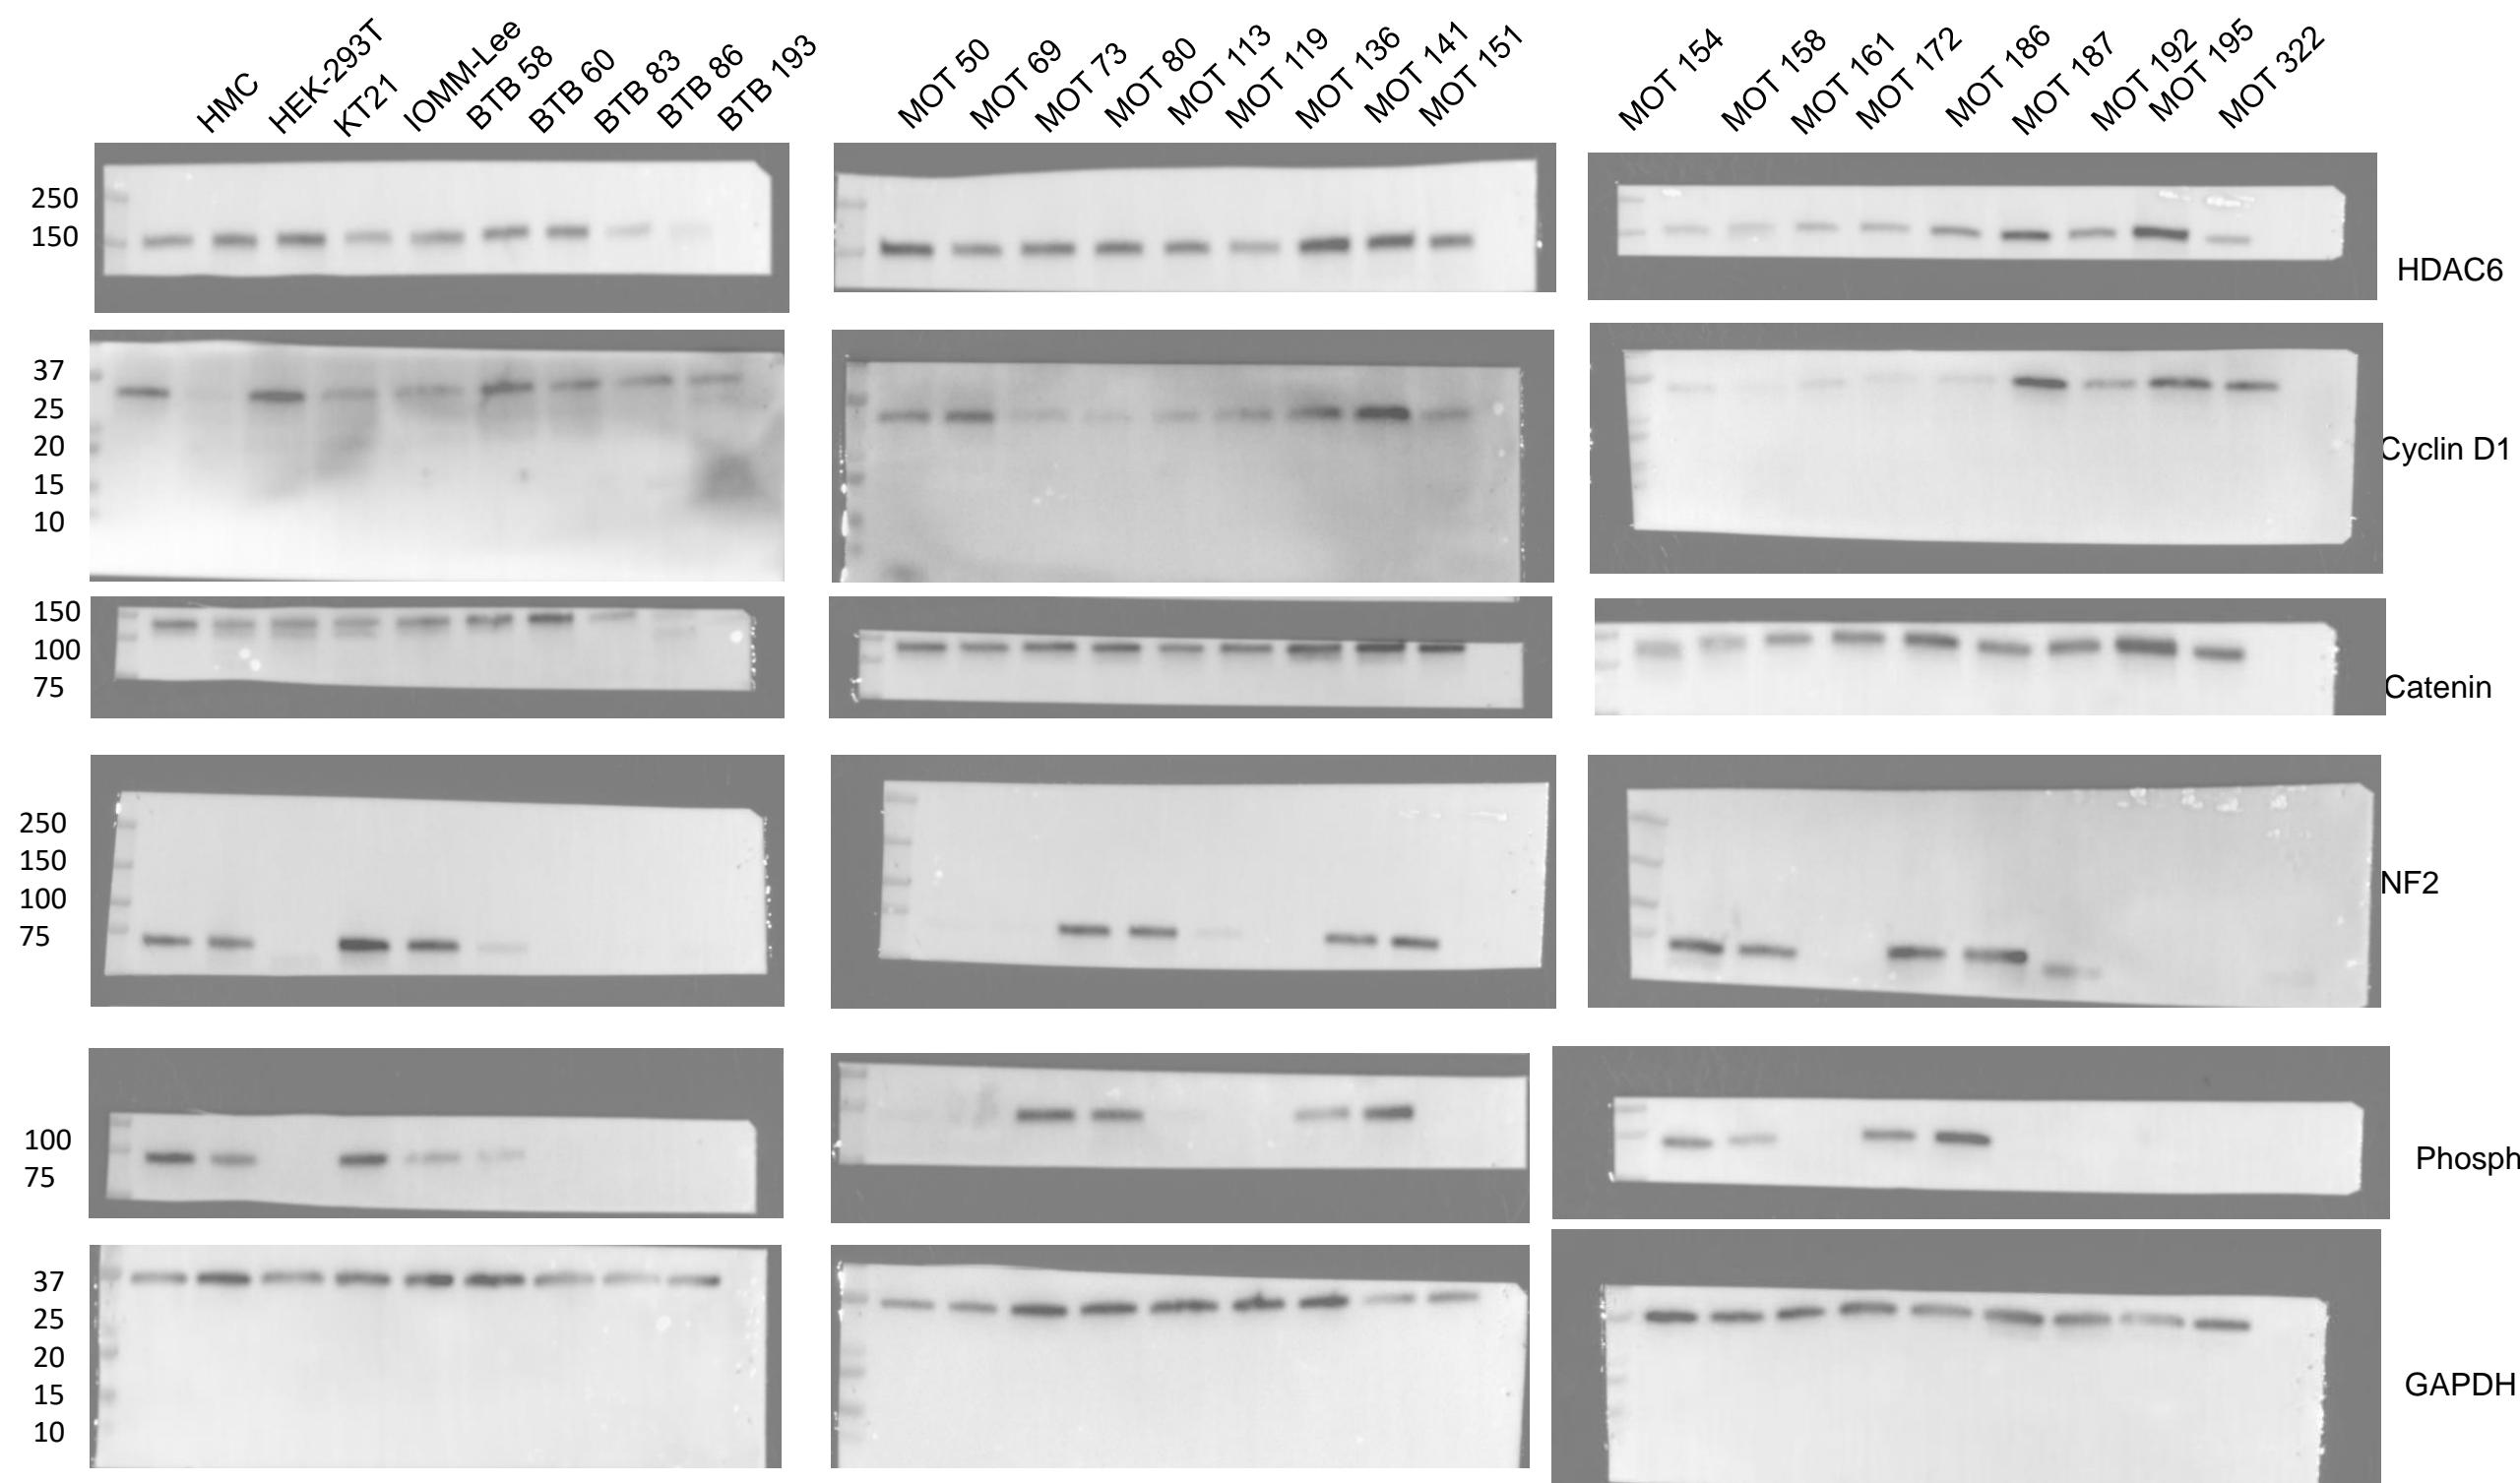

**Figure 3**

**b**

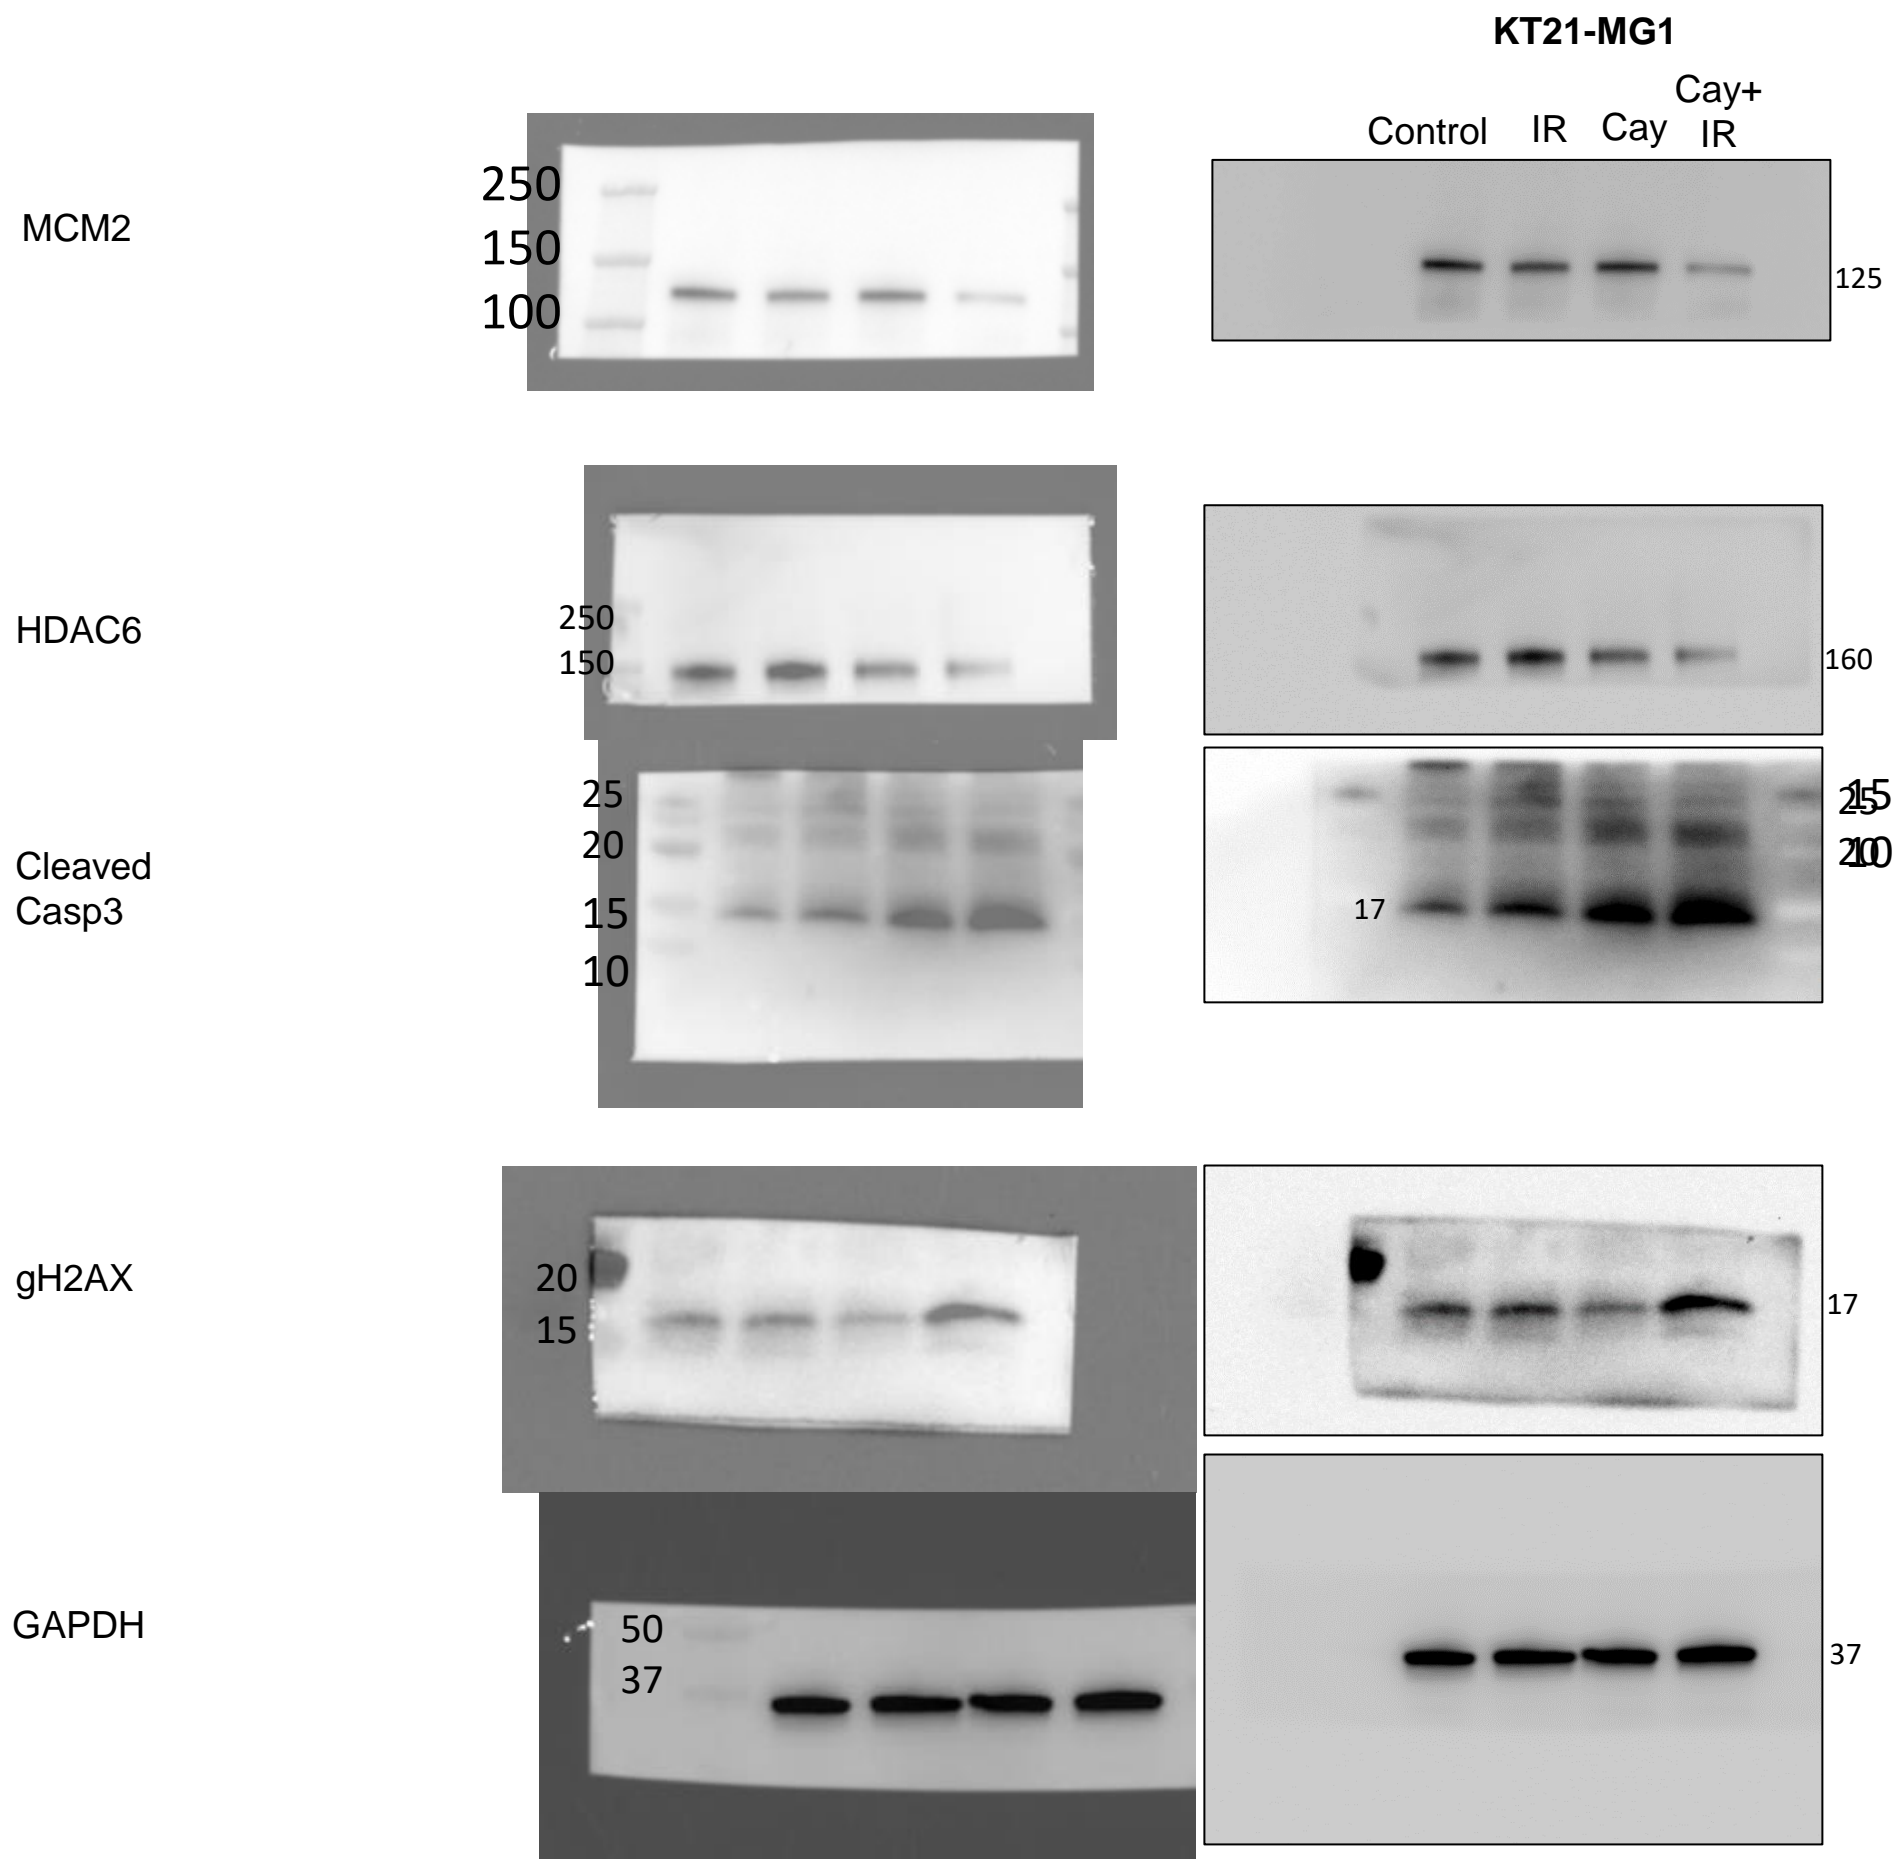

Figure 3

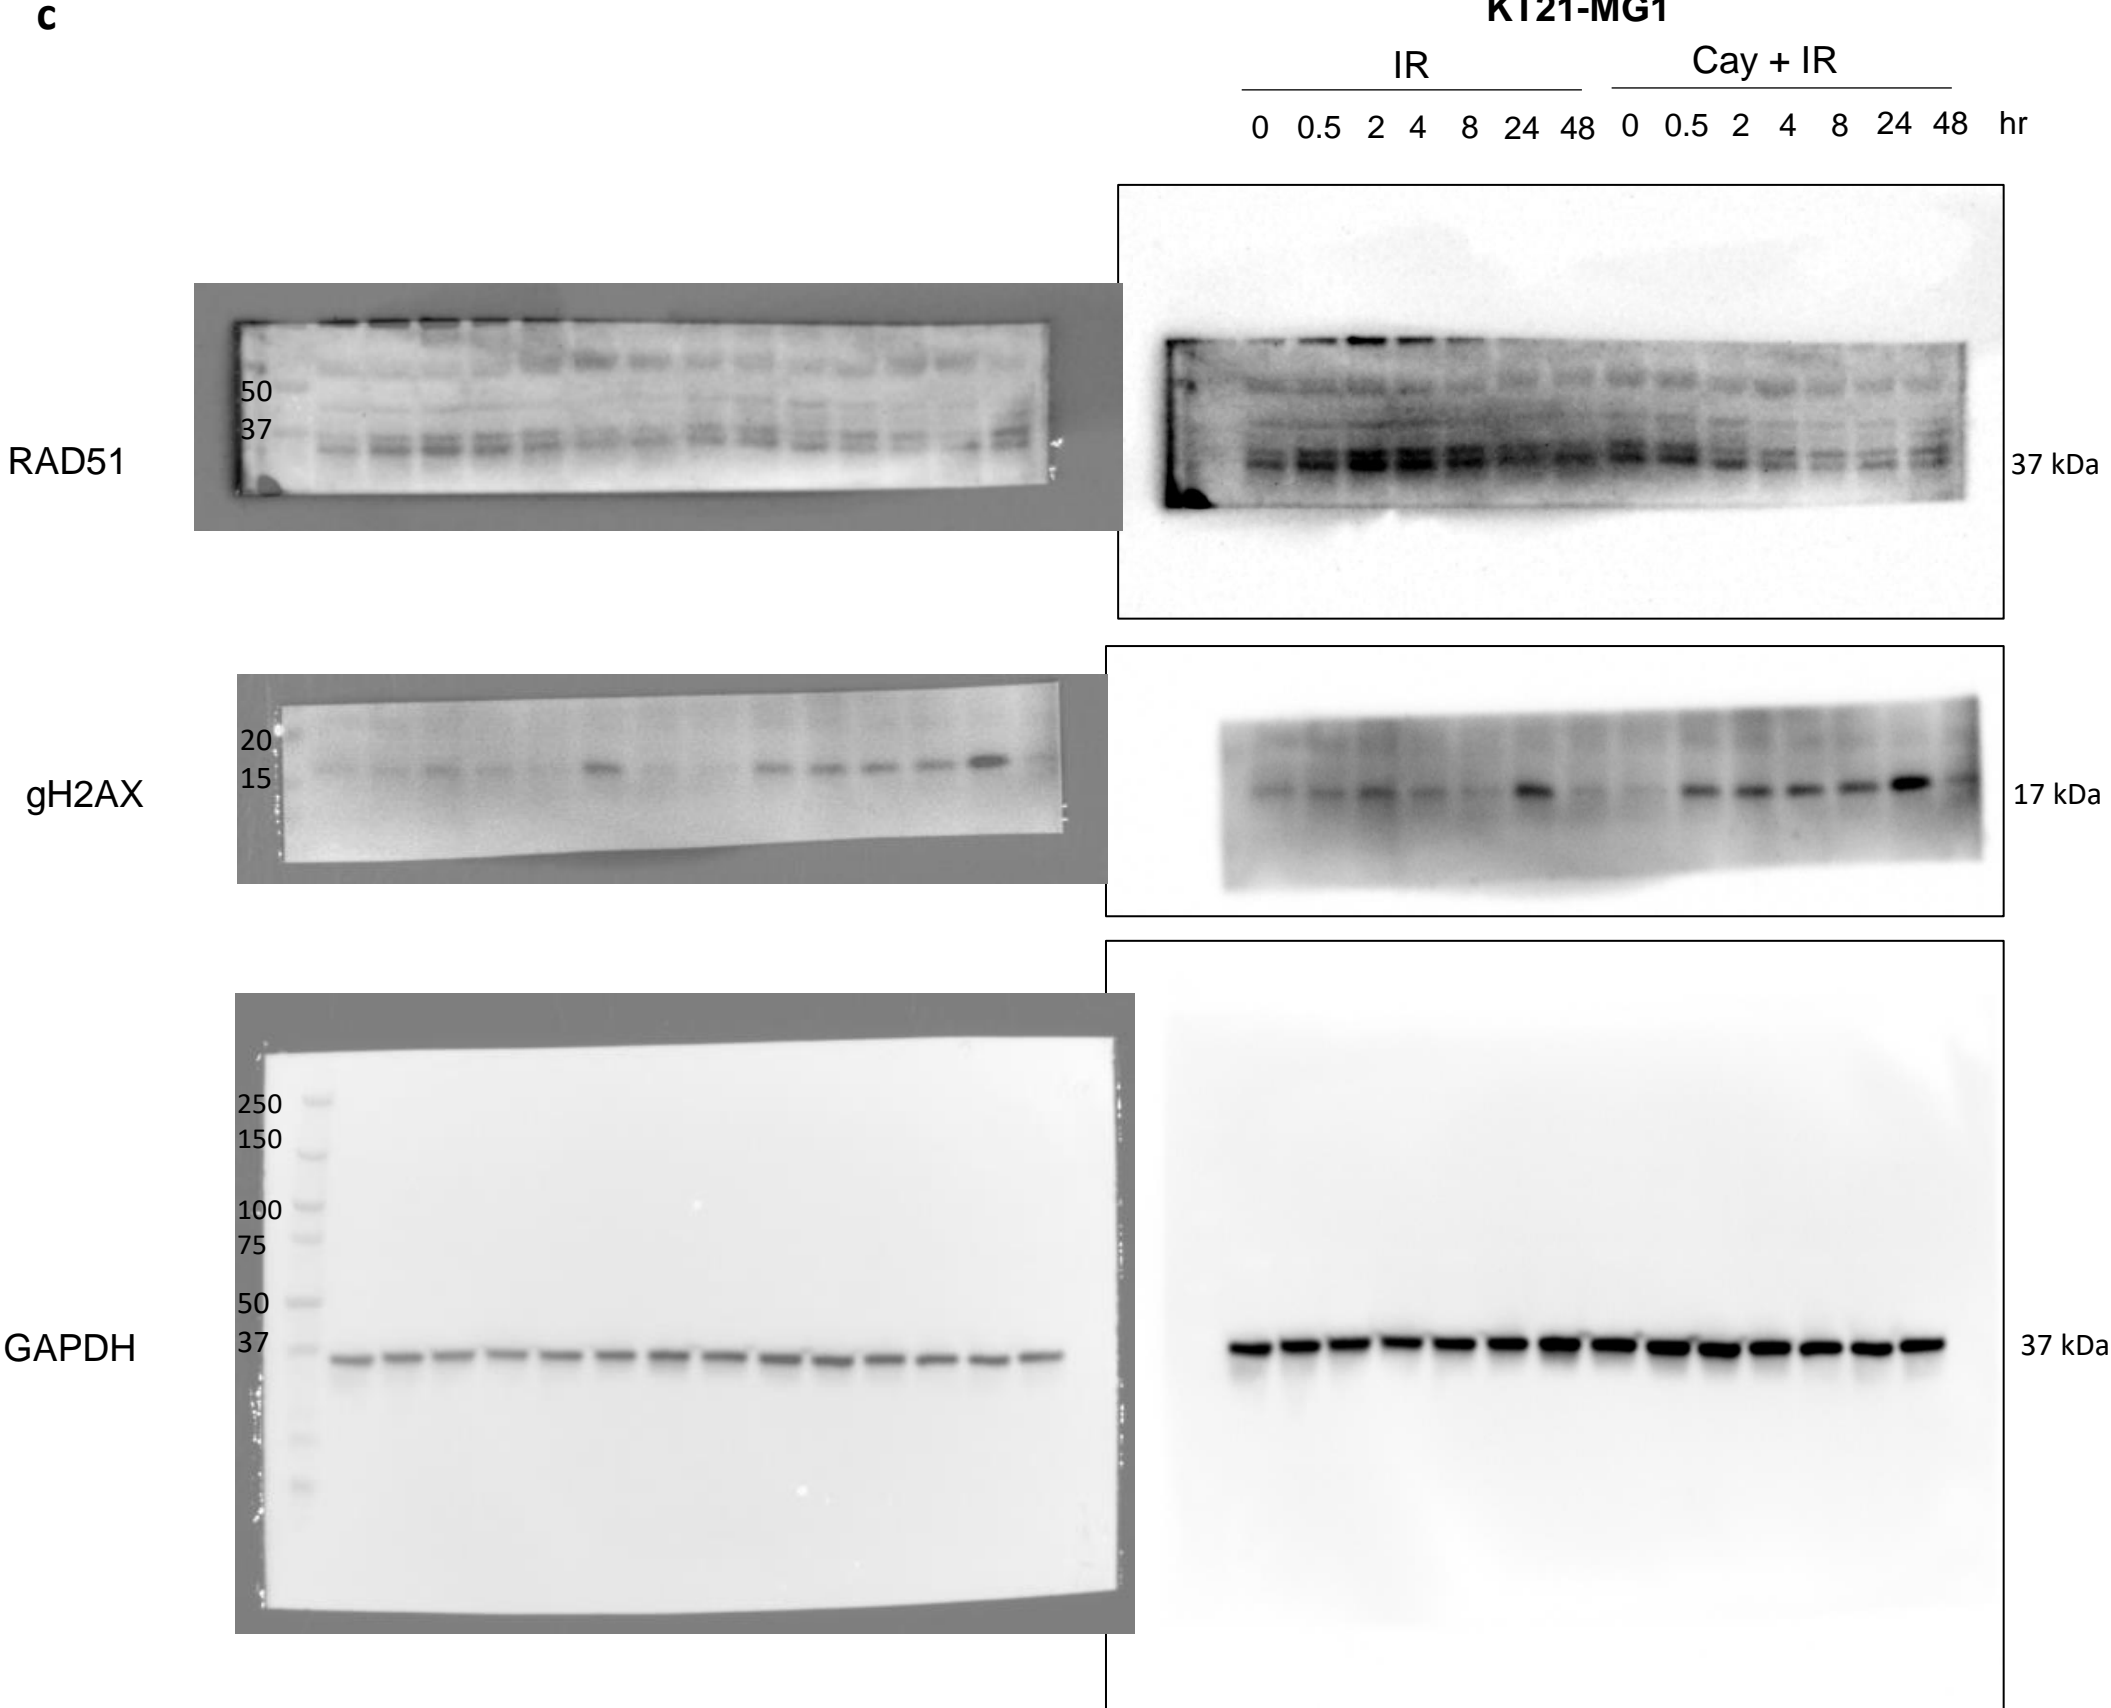



**Figure 3**

**d**

CAY10603

**KT21-MG1**

0 1 5 10 50 100 500 1000 5000 nM

HDAC1

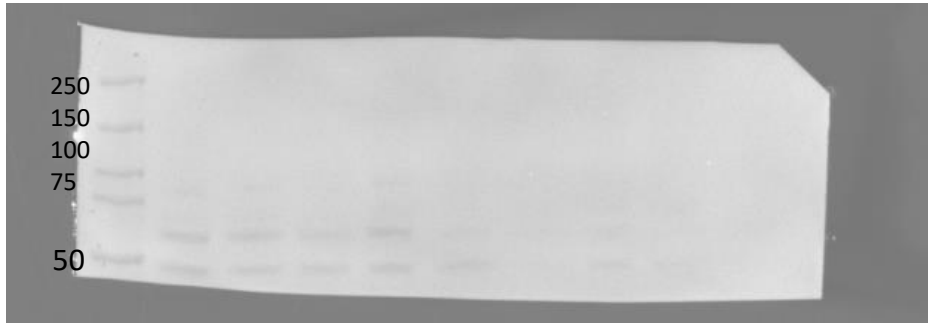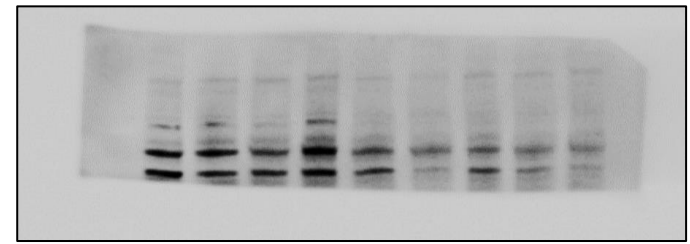

HDAC2

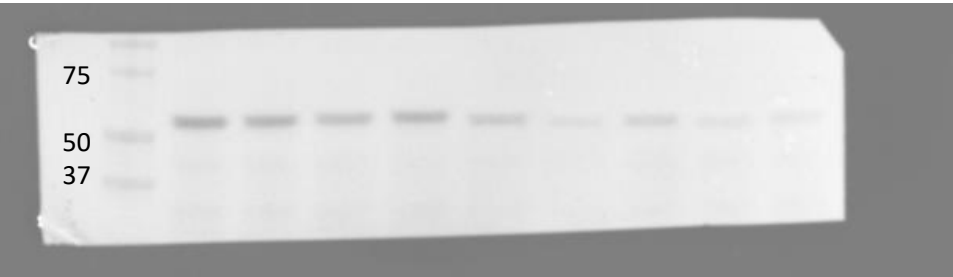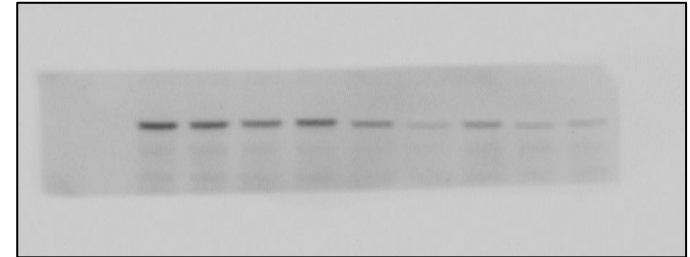

HDAC3

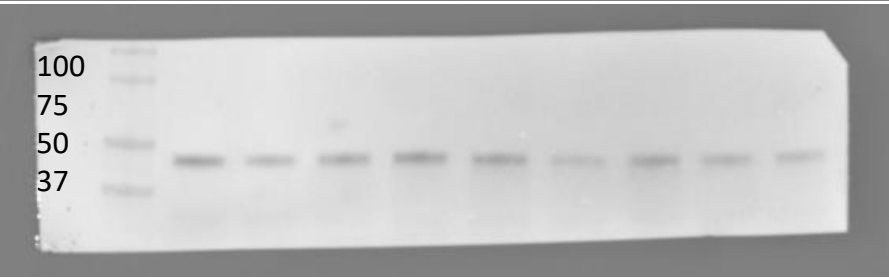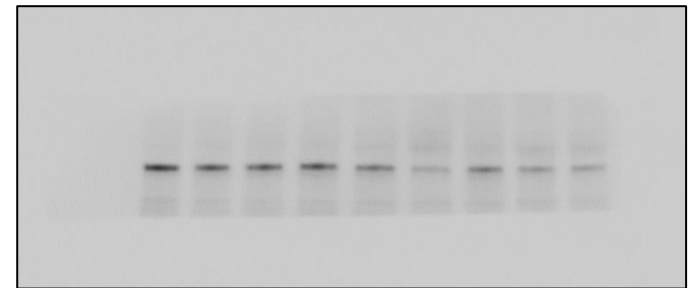

HDAC6

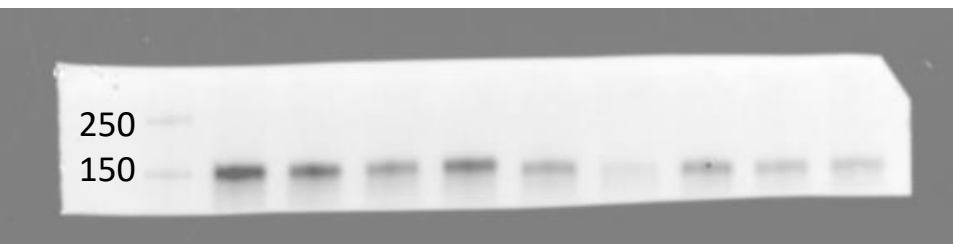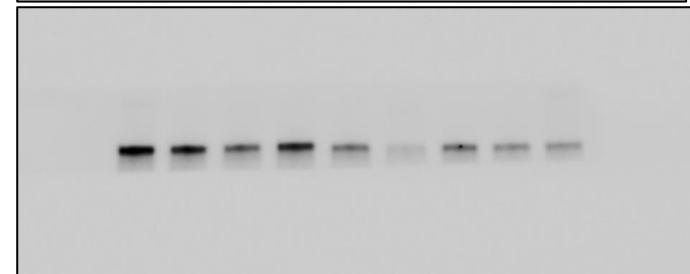

H3K27Ace

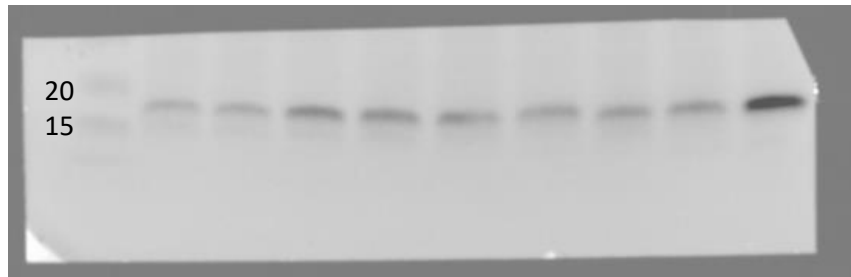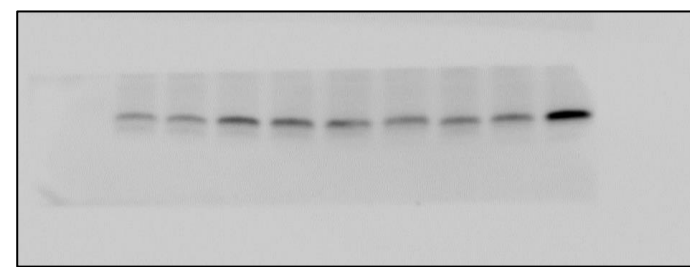

GAPDH

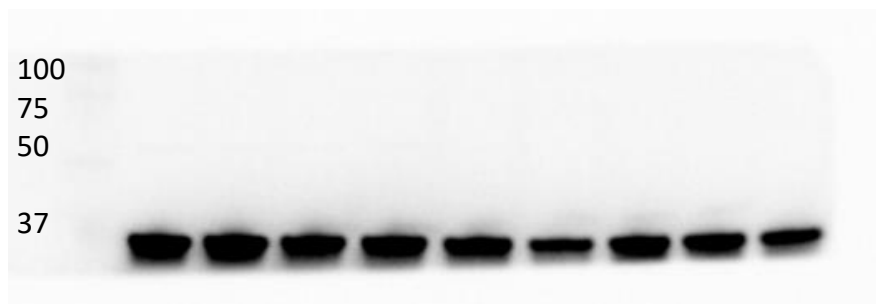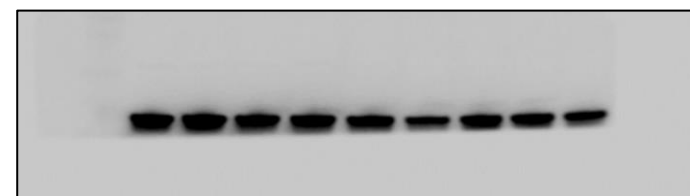

HDAC7

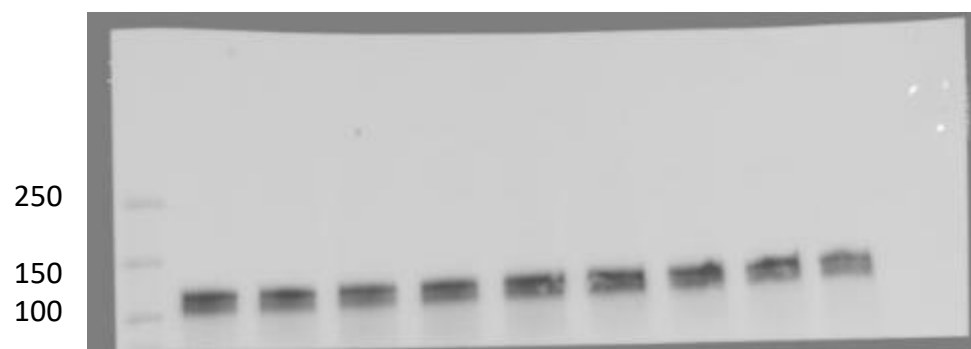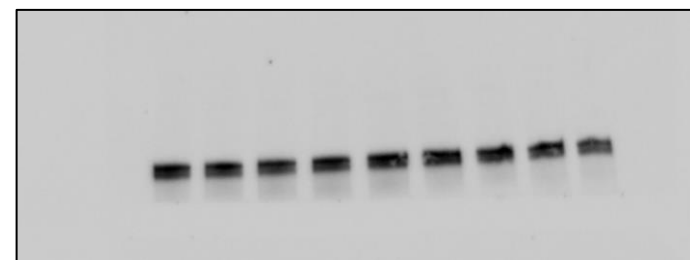

GAPDH

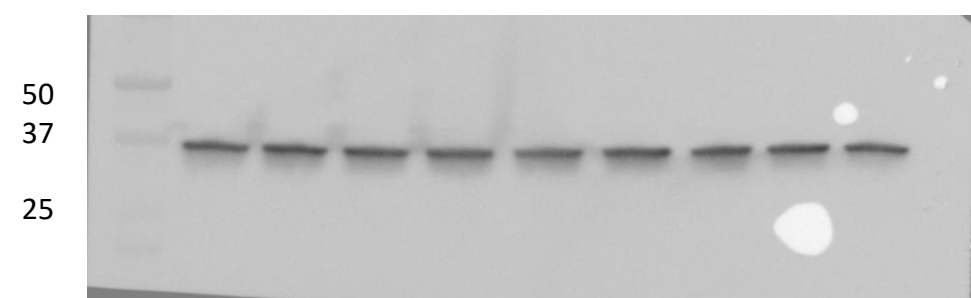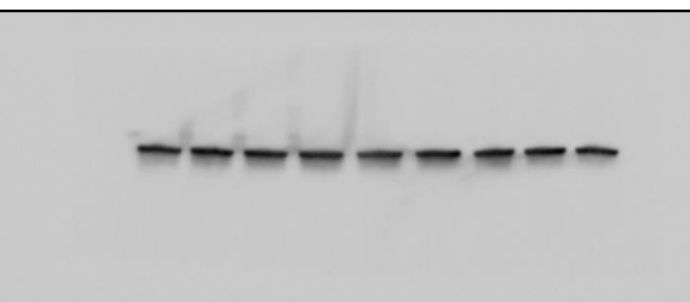

Figure 3

e

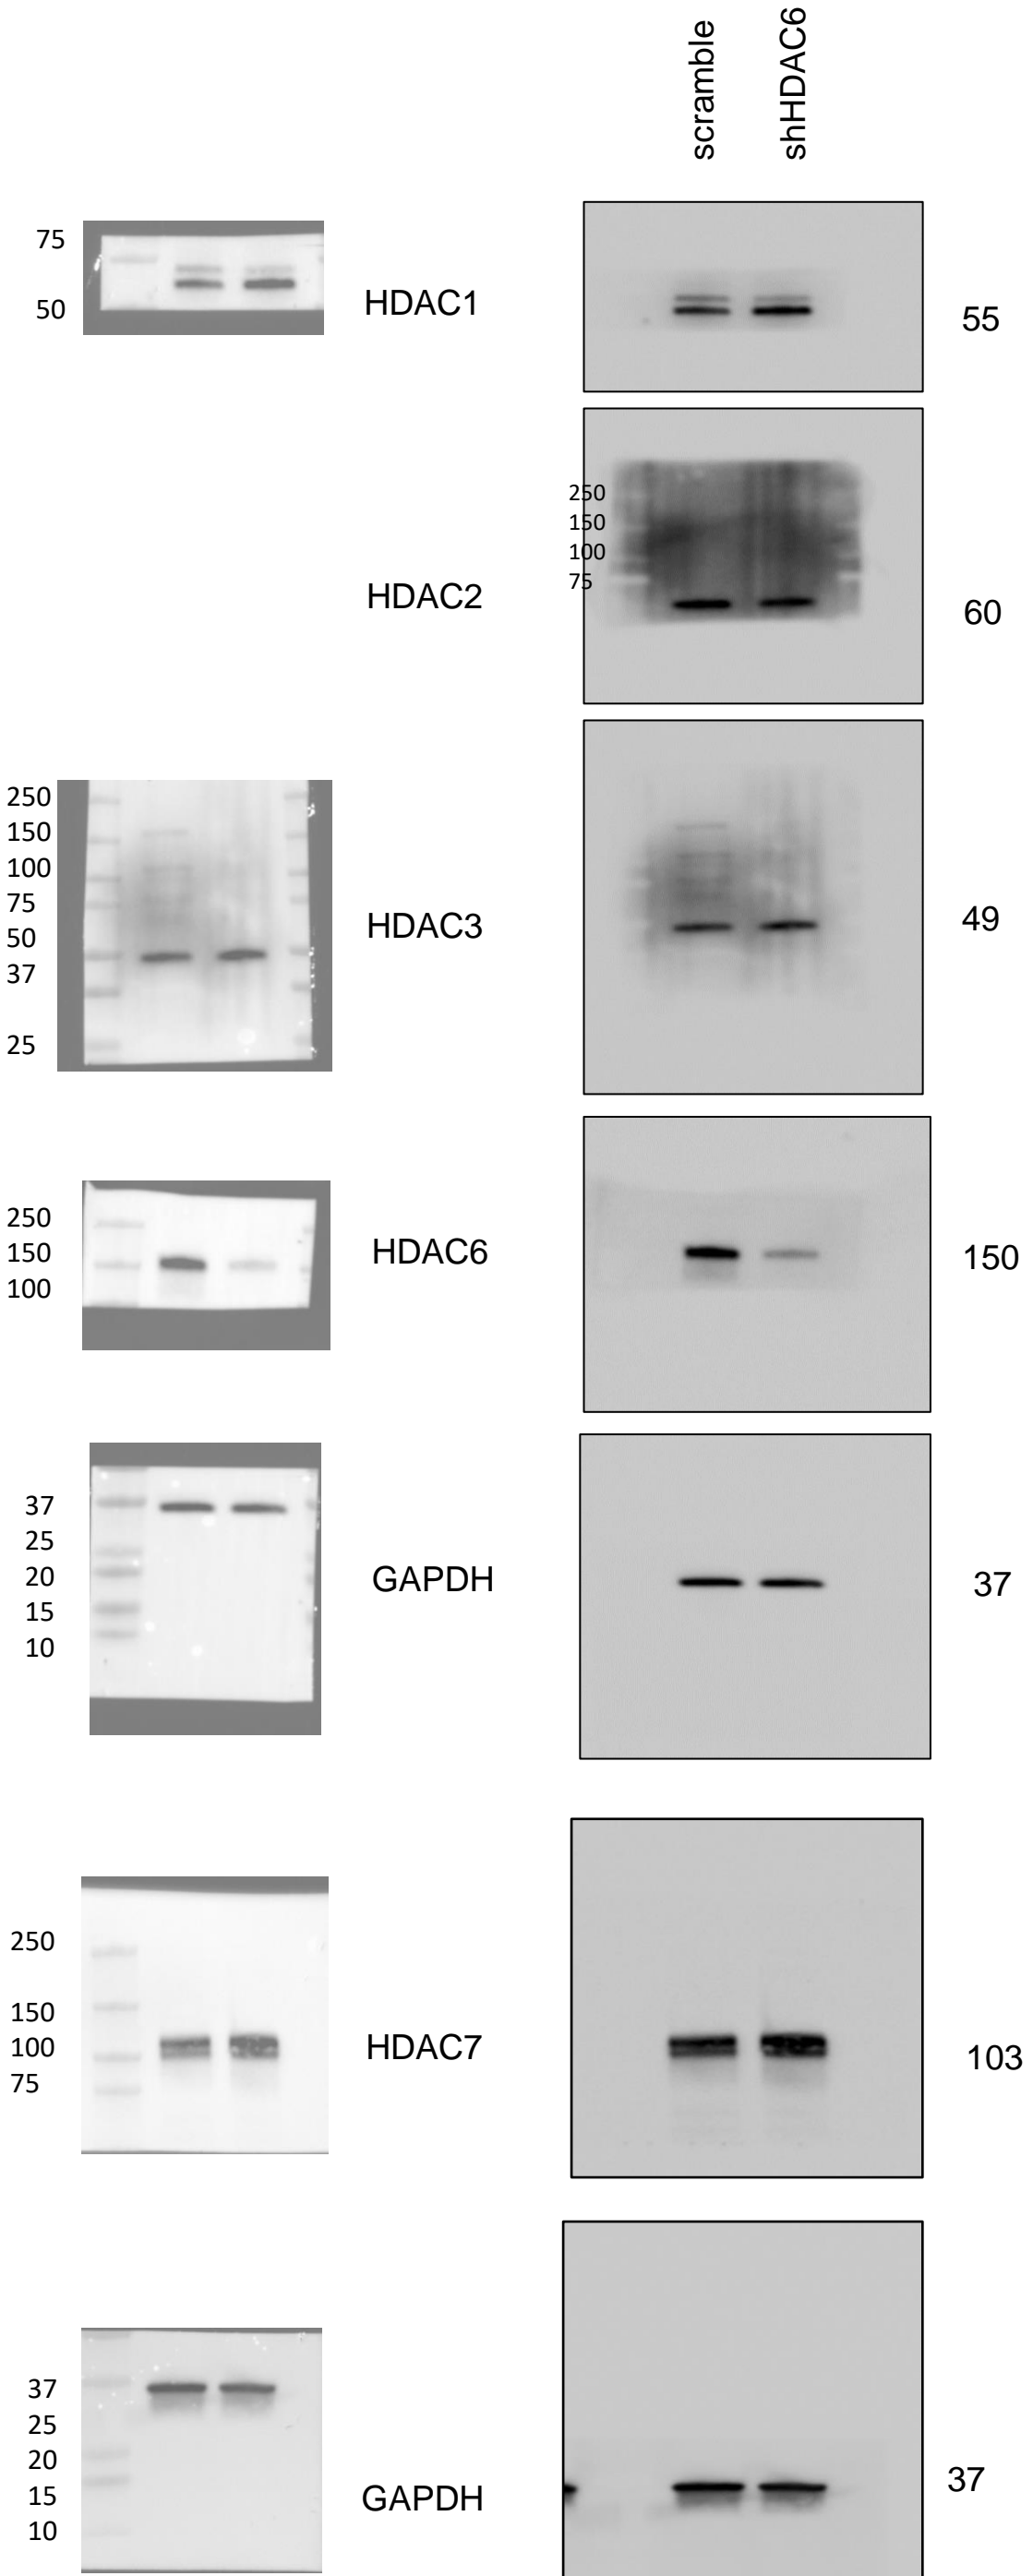

Figure 6

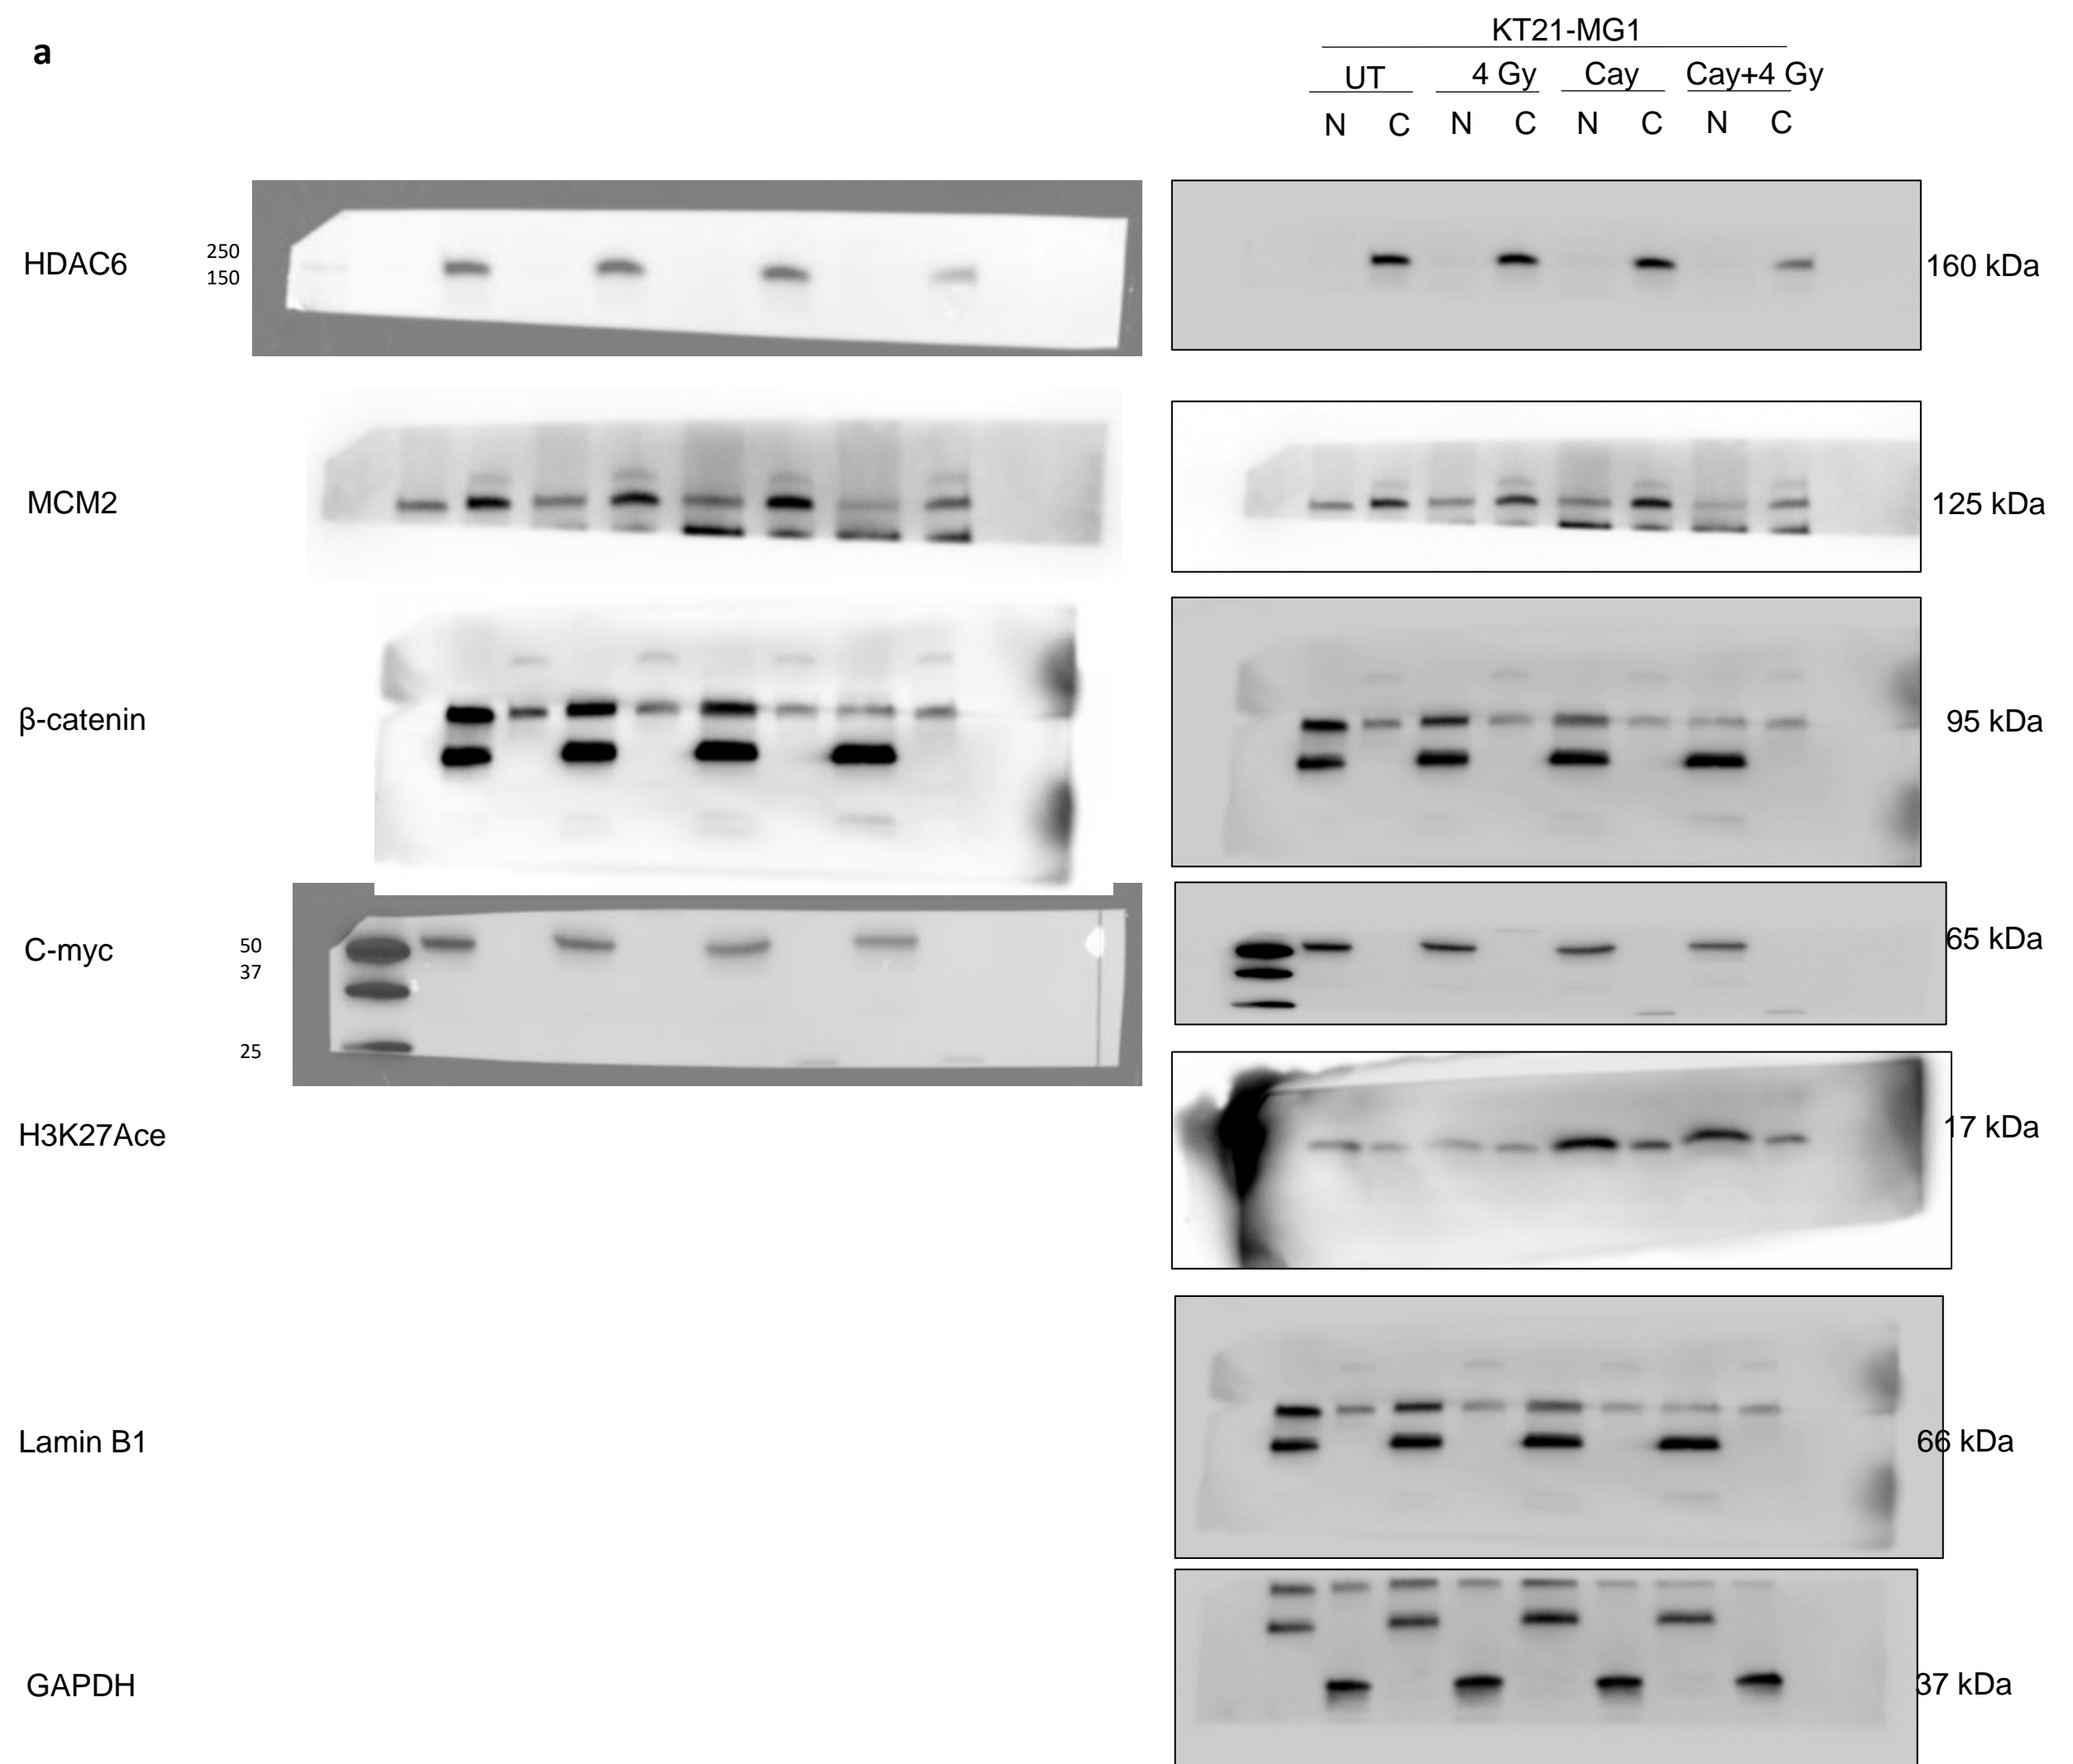



**Figure 6**

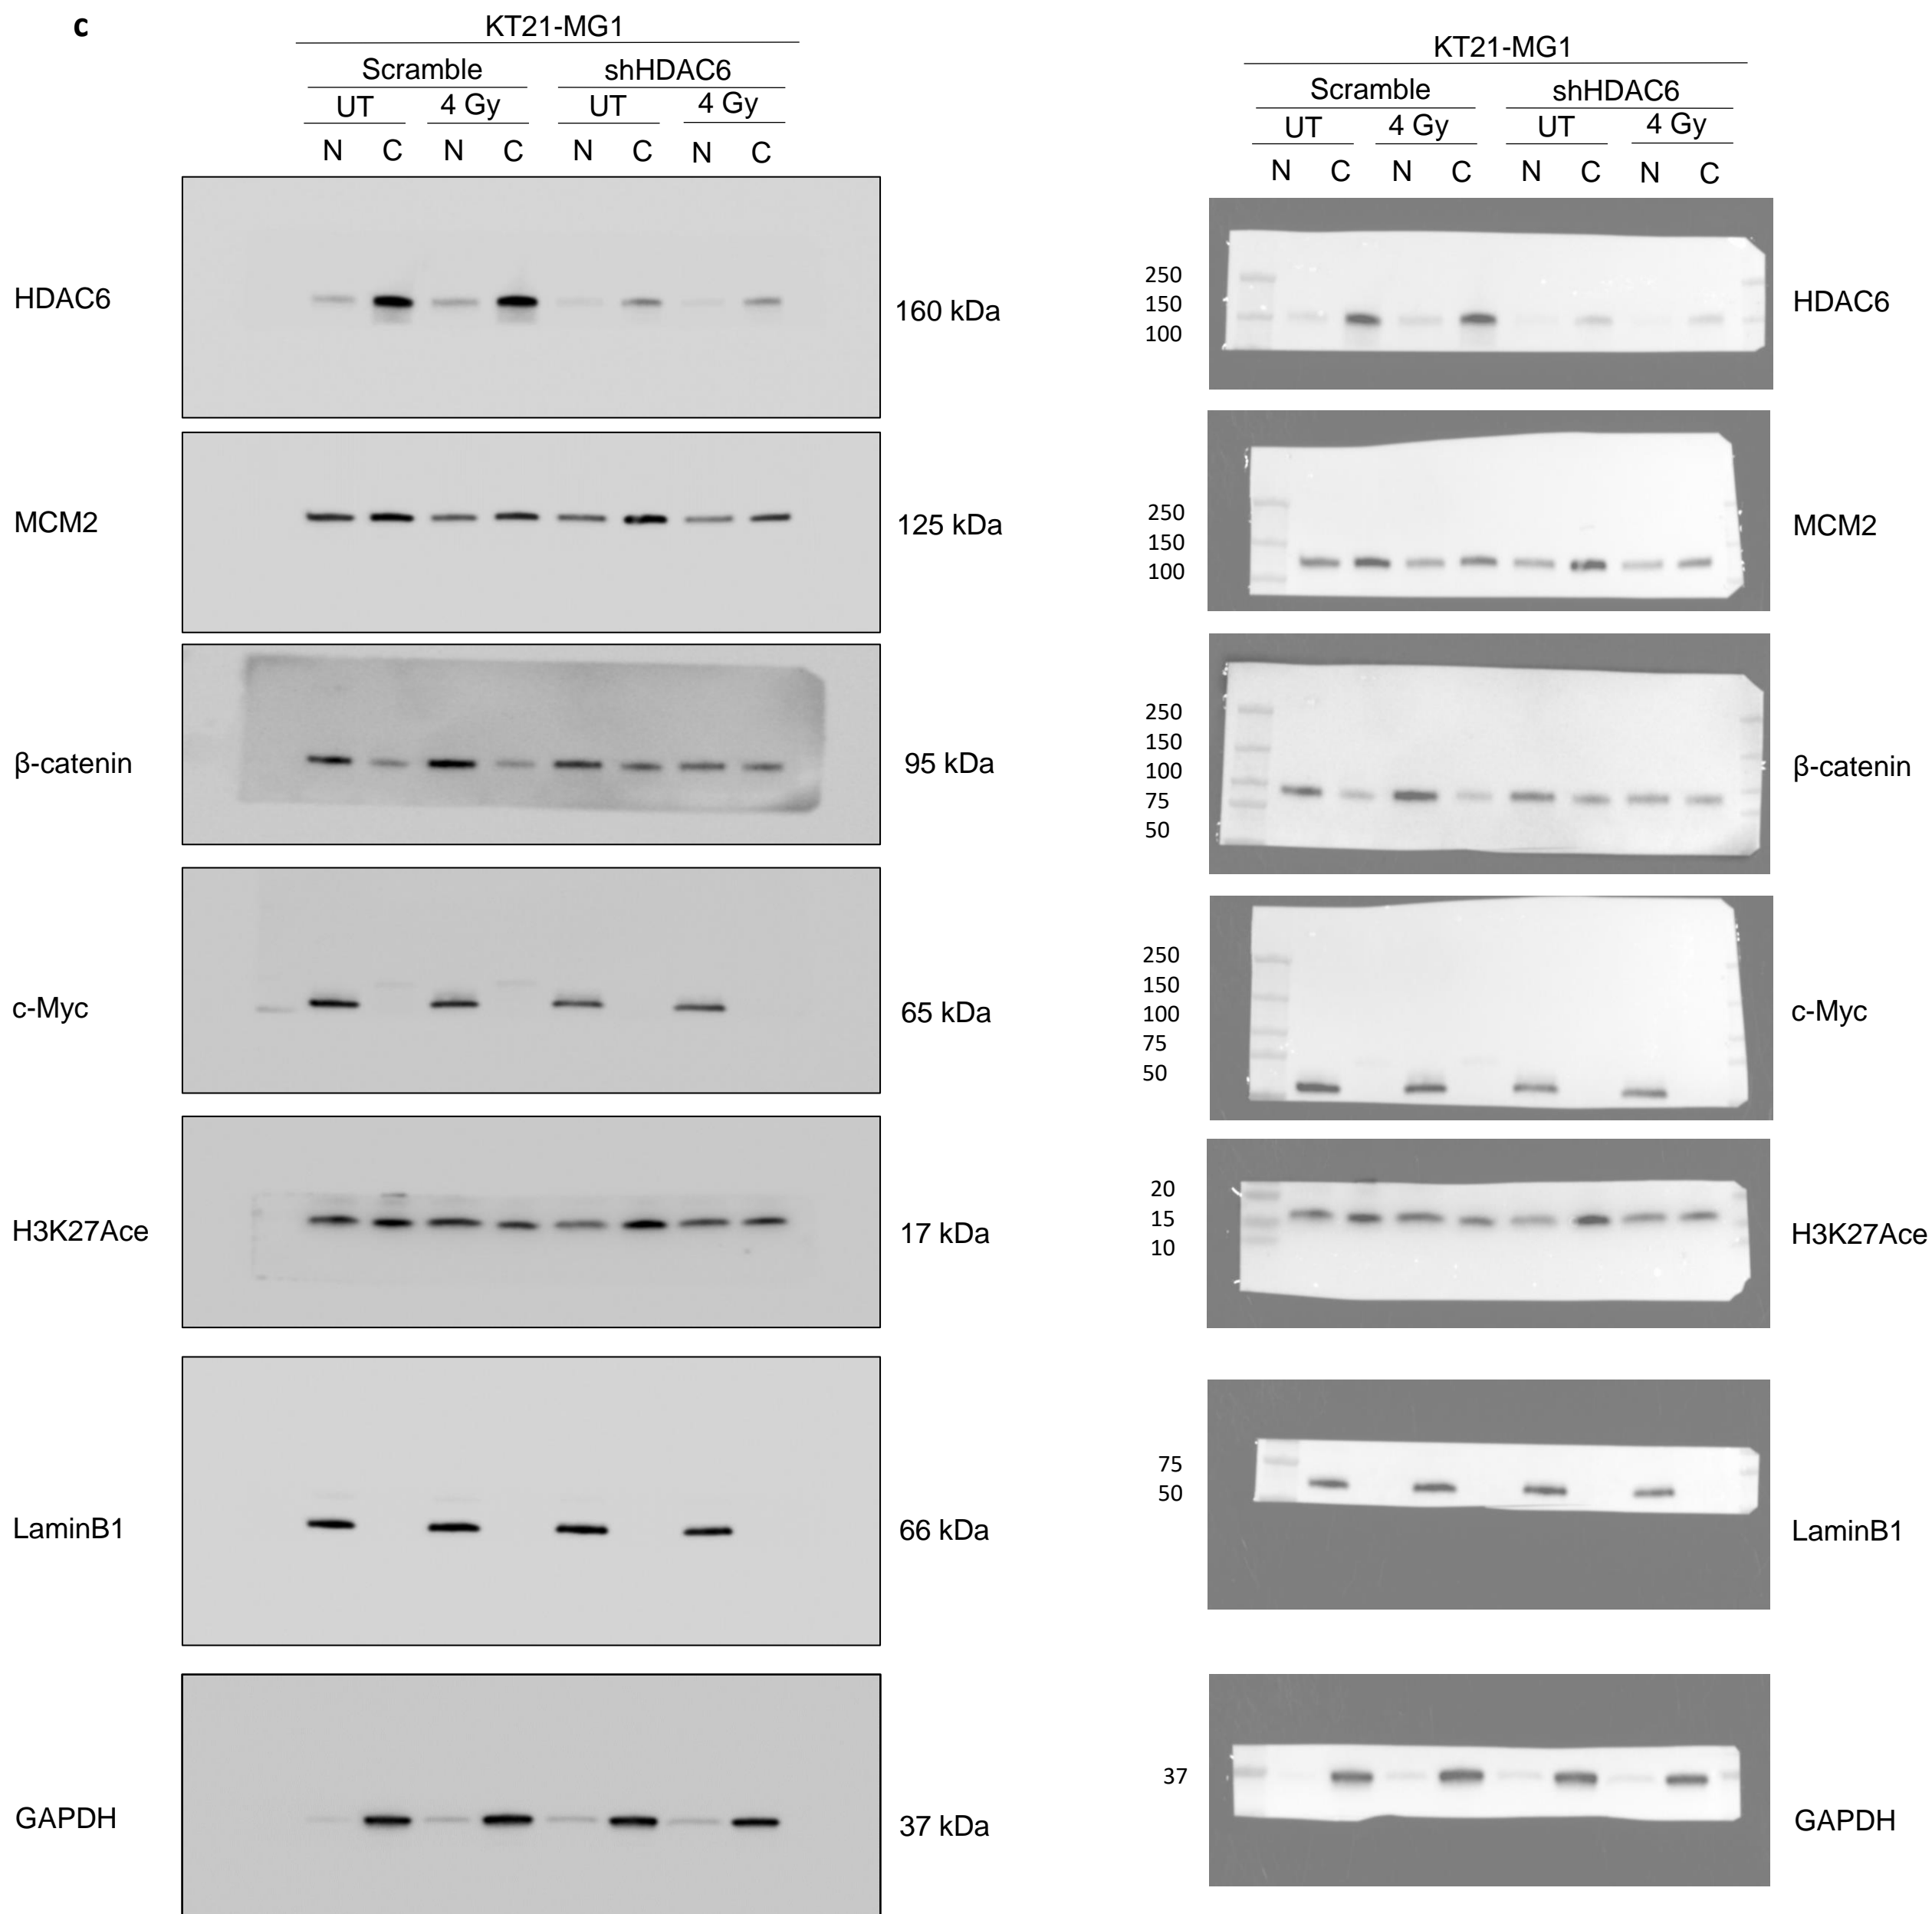

Figure 8

e

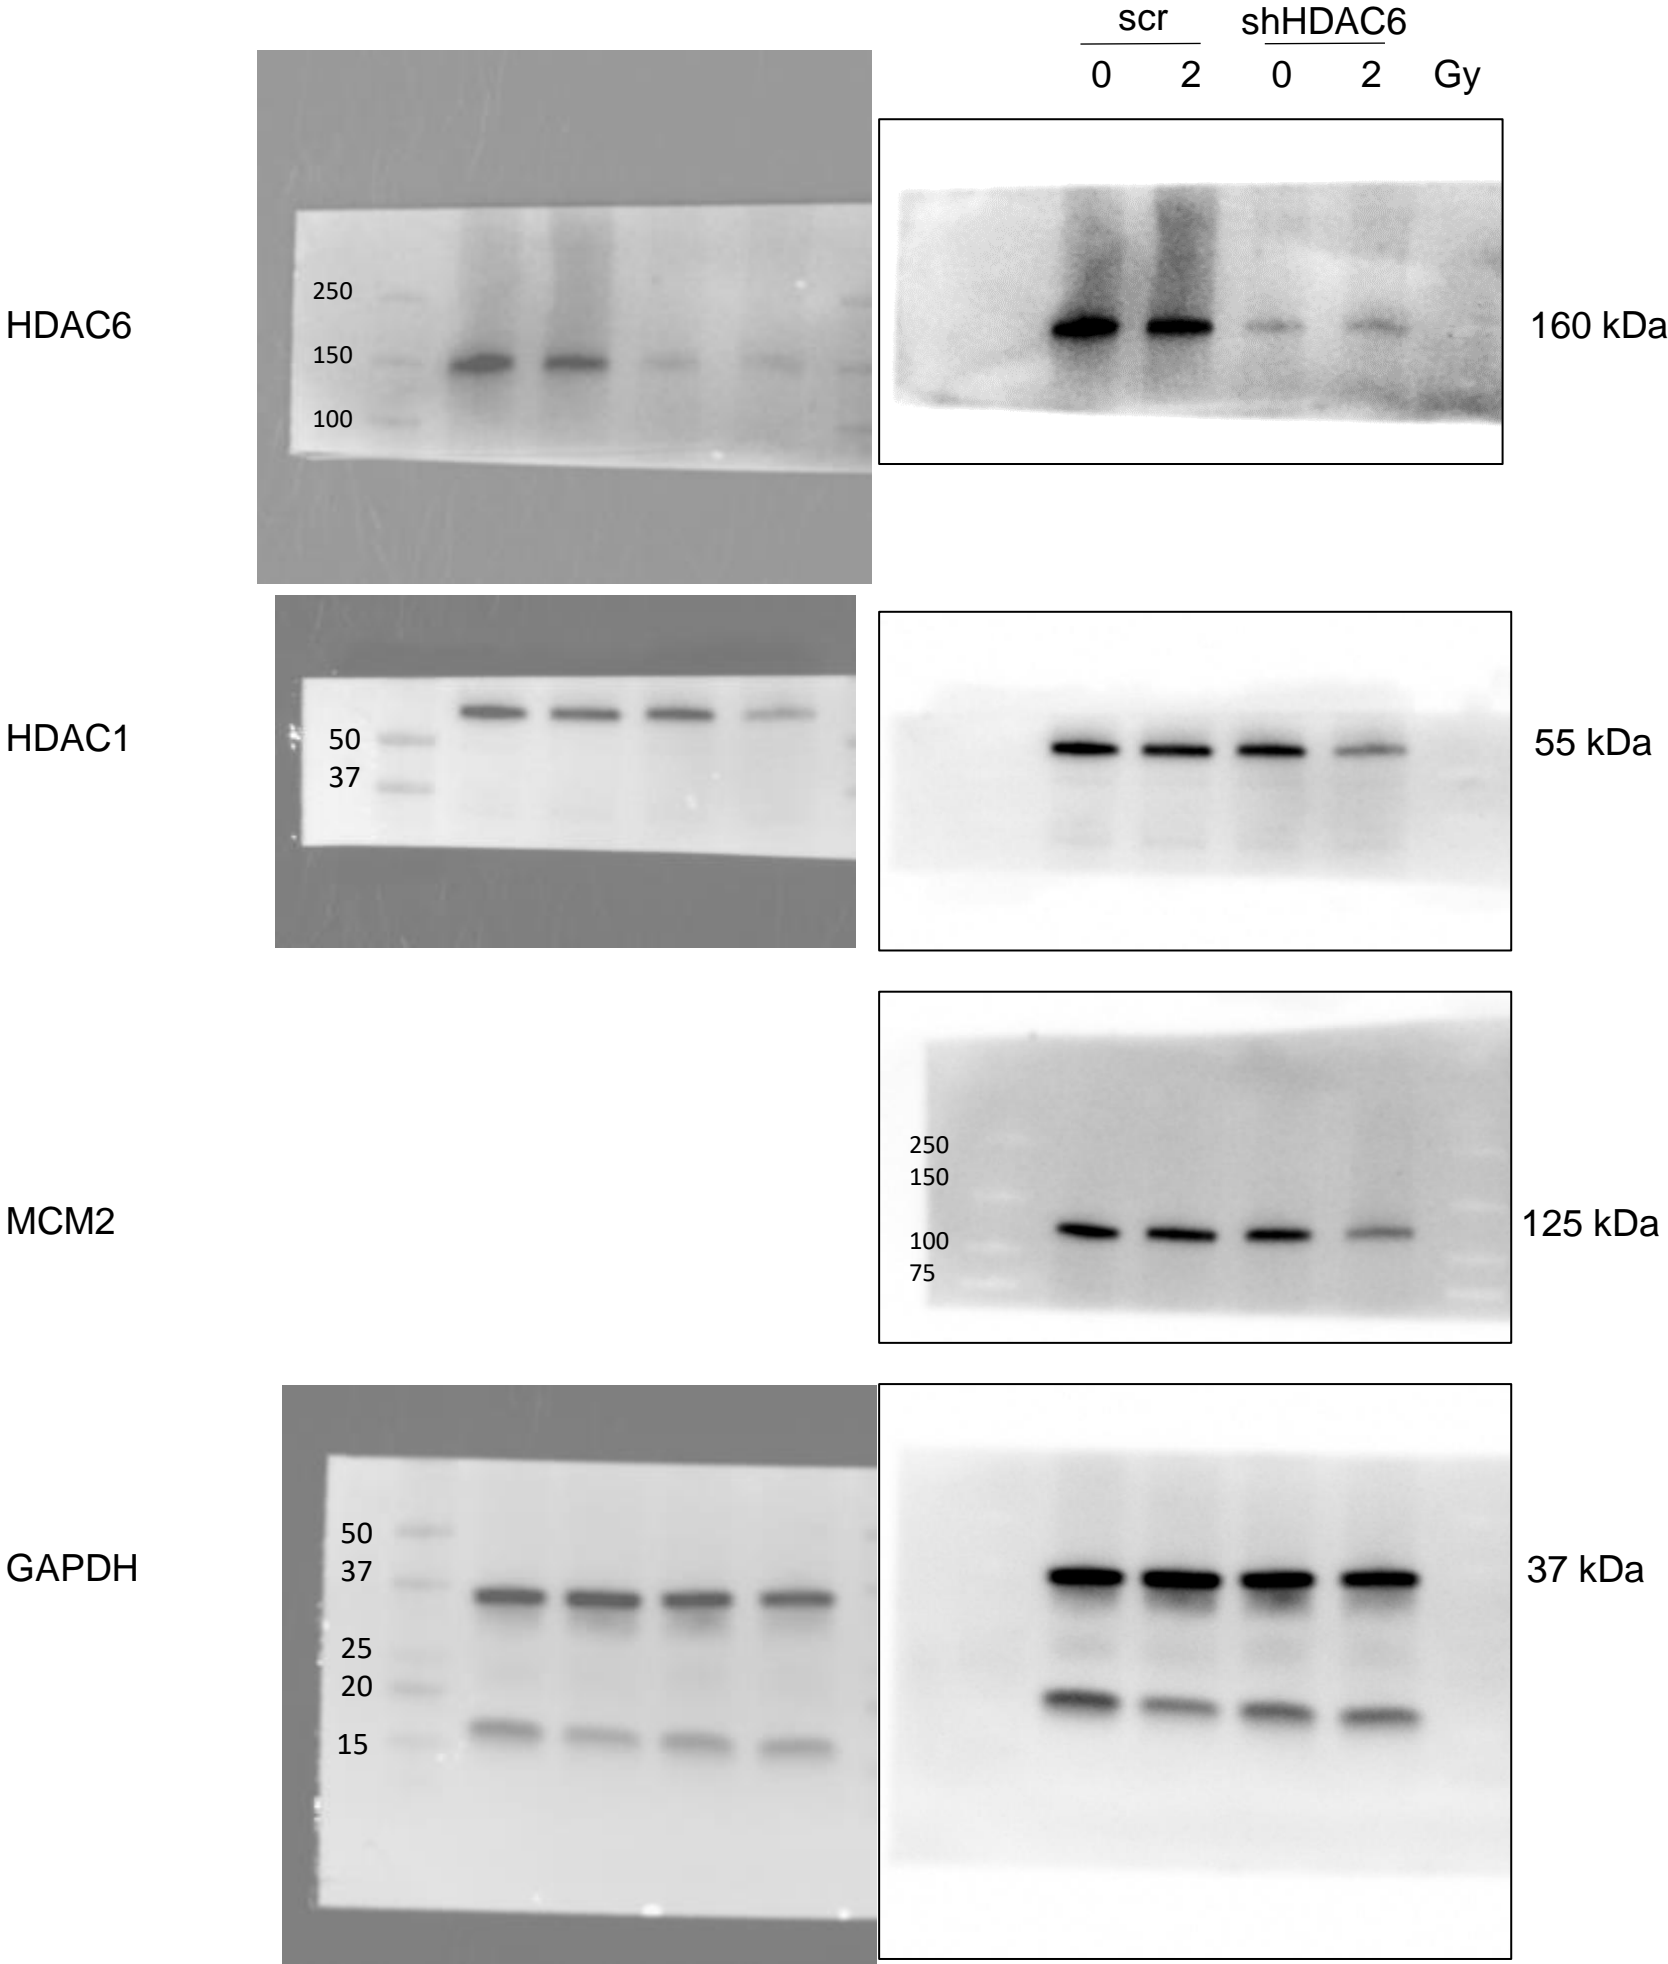



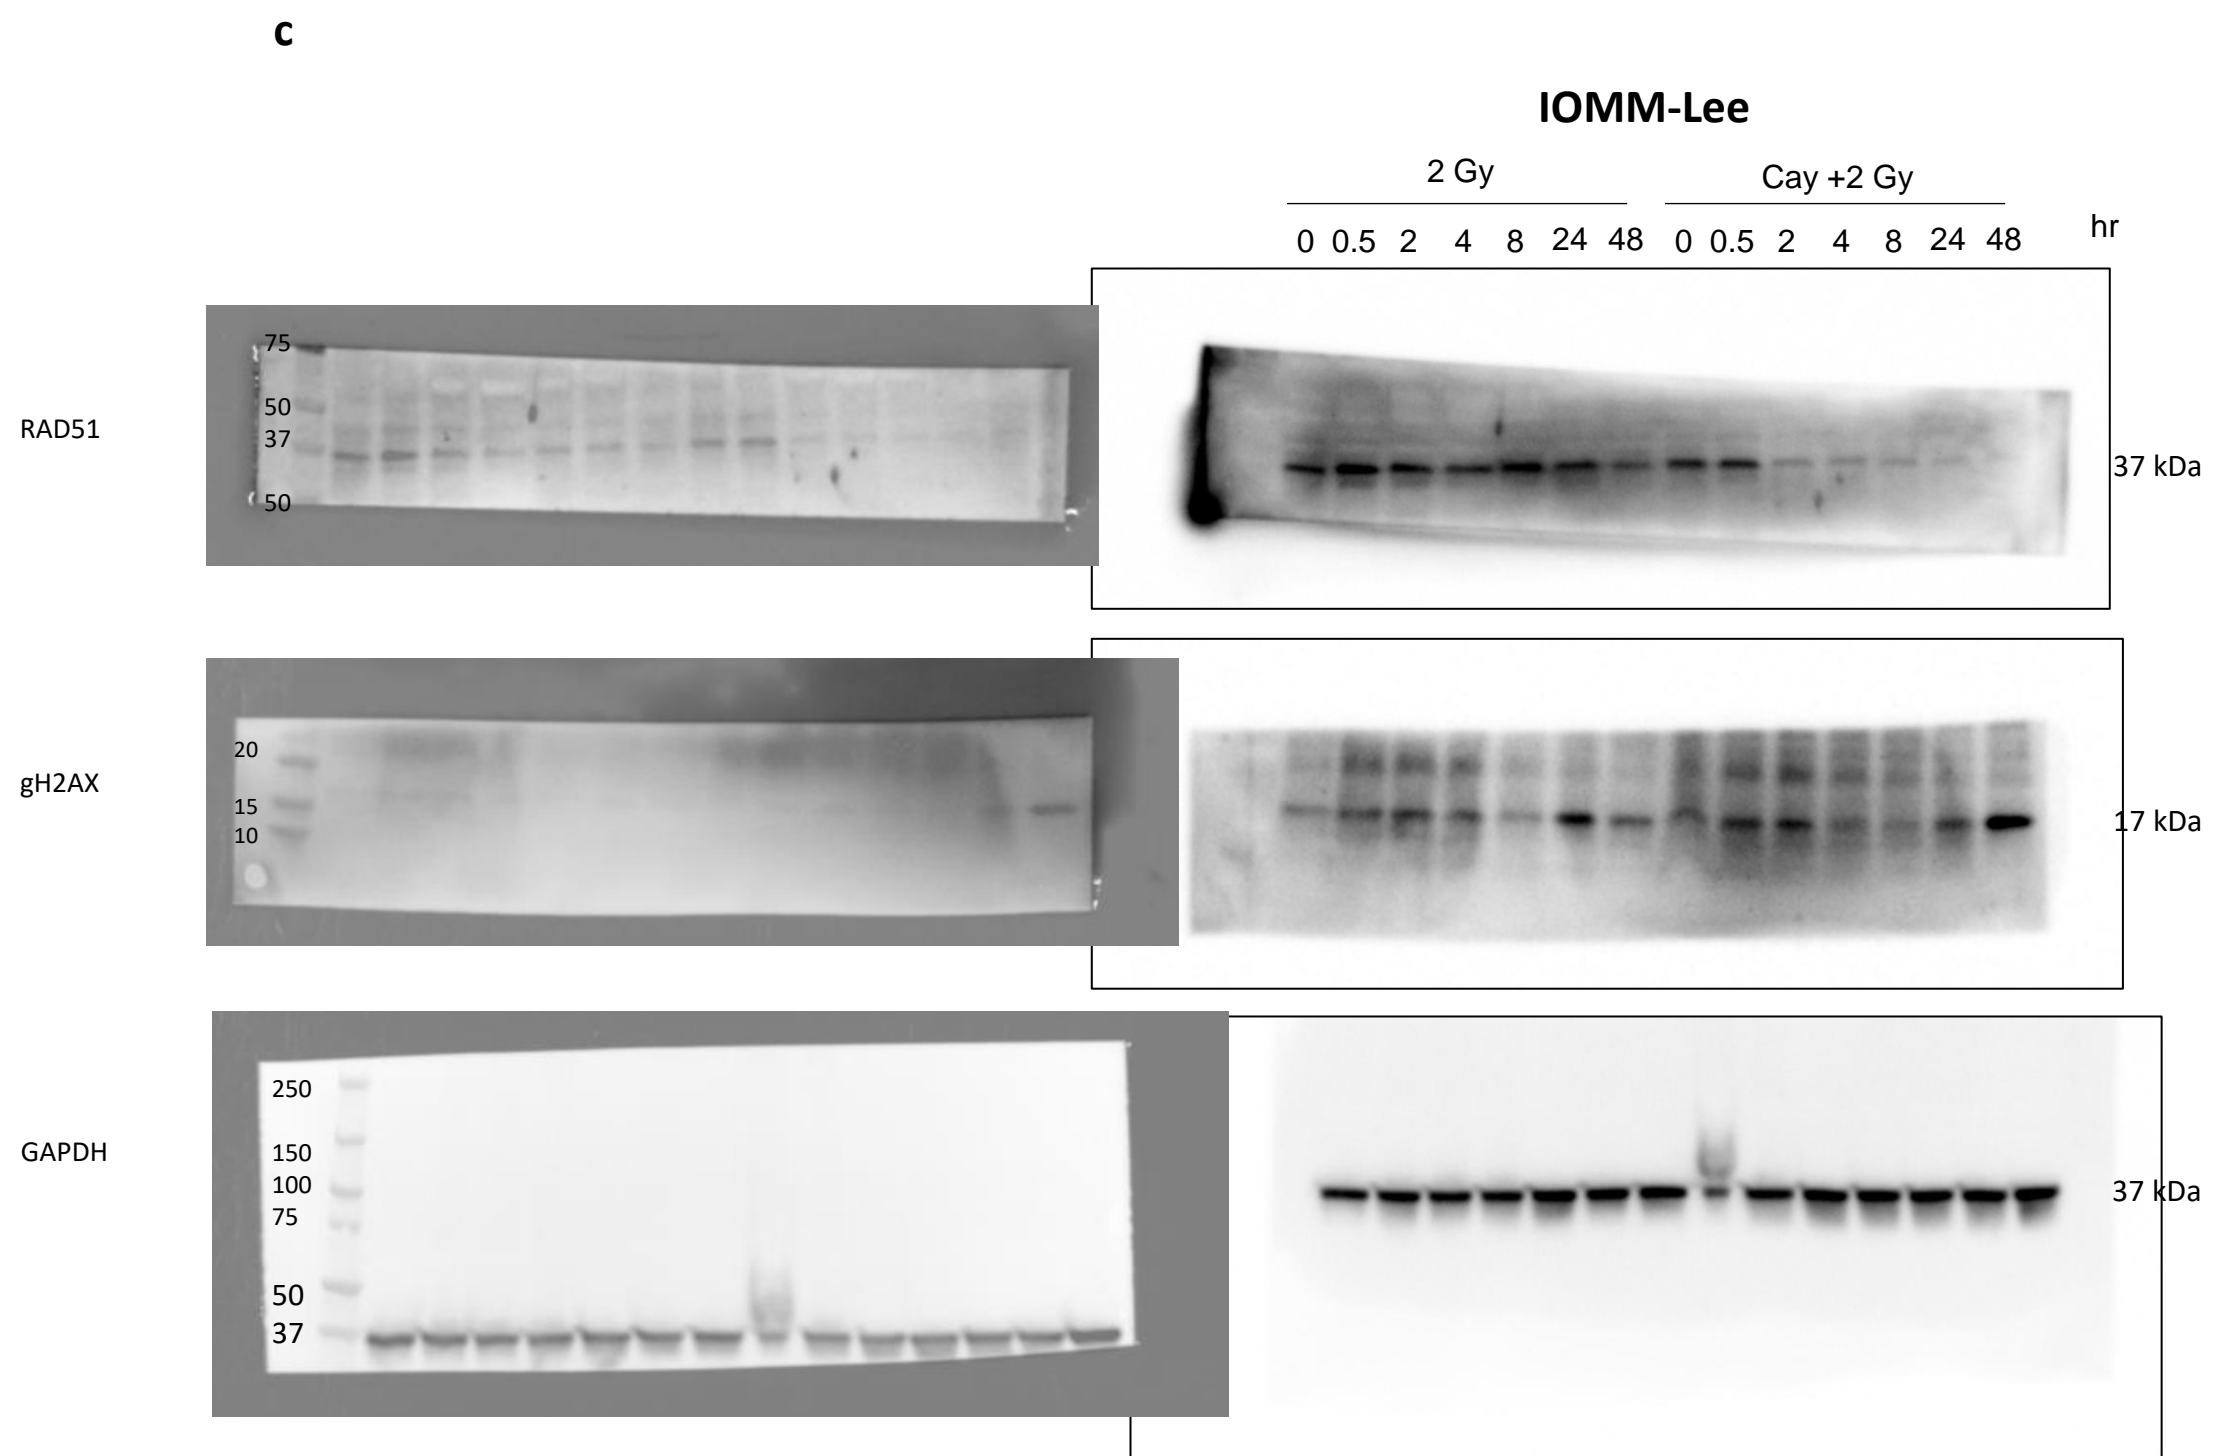



Supplementary Figure S4

a

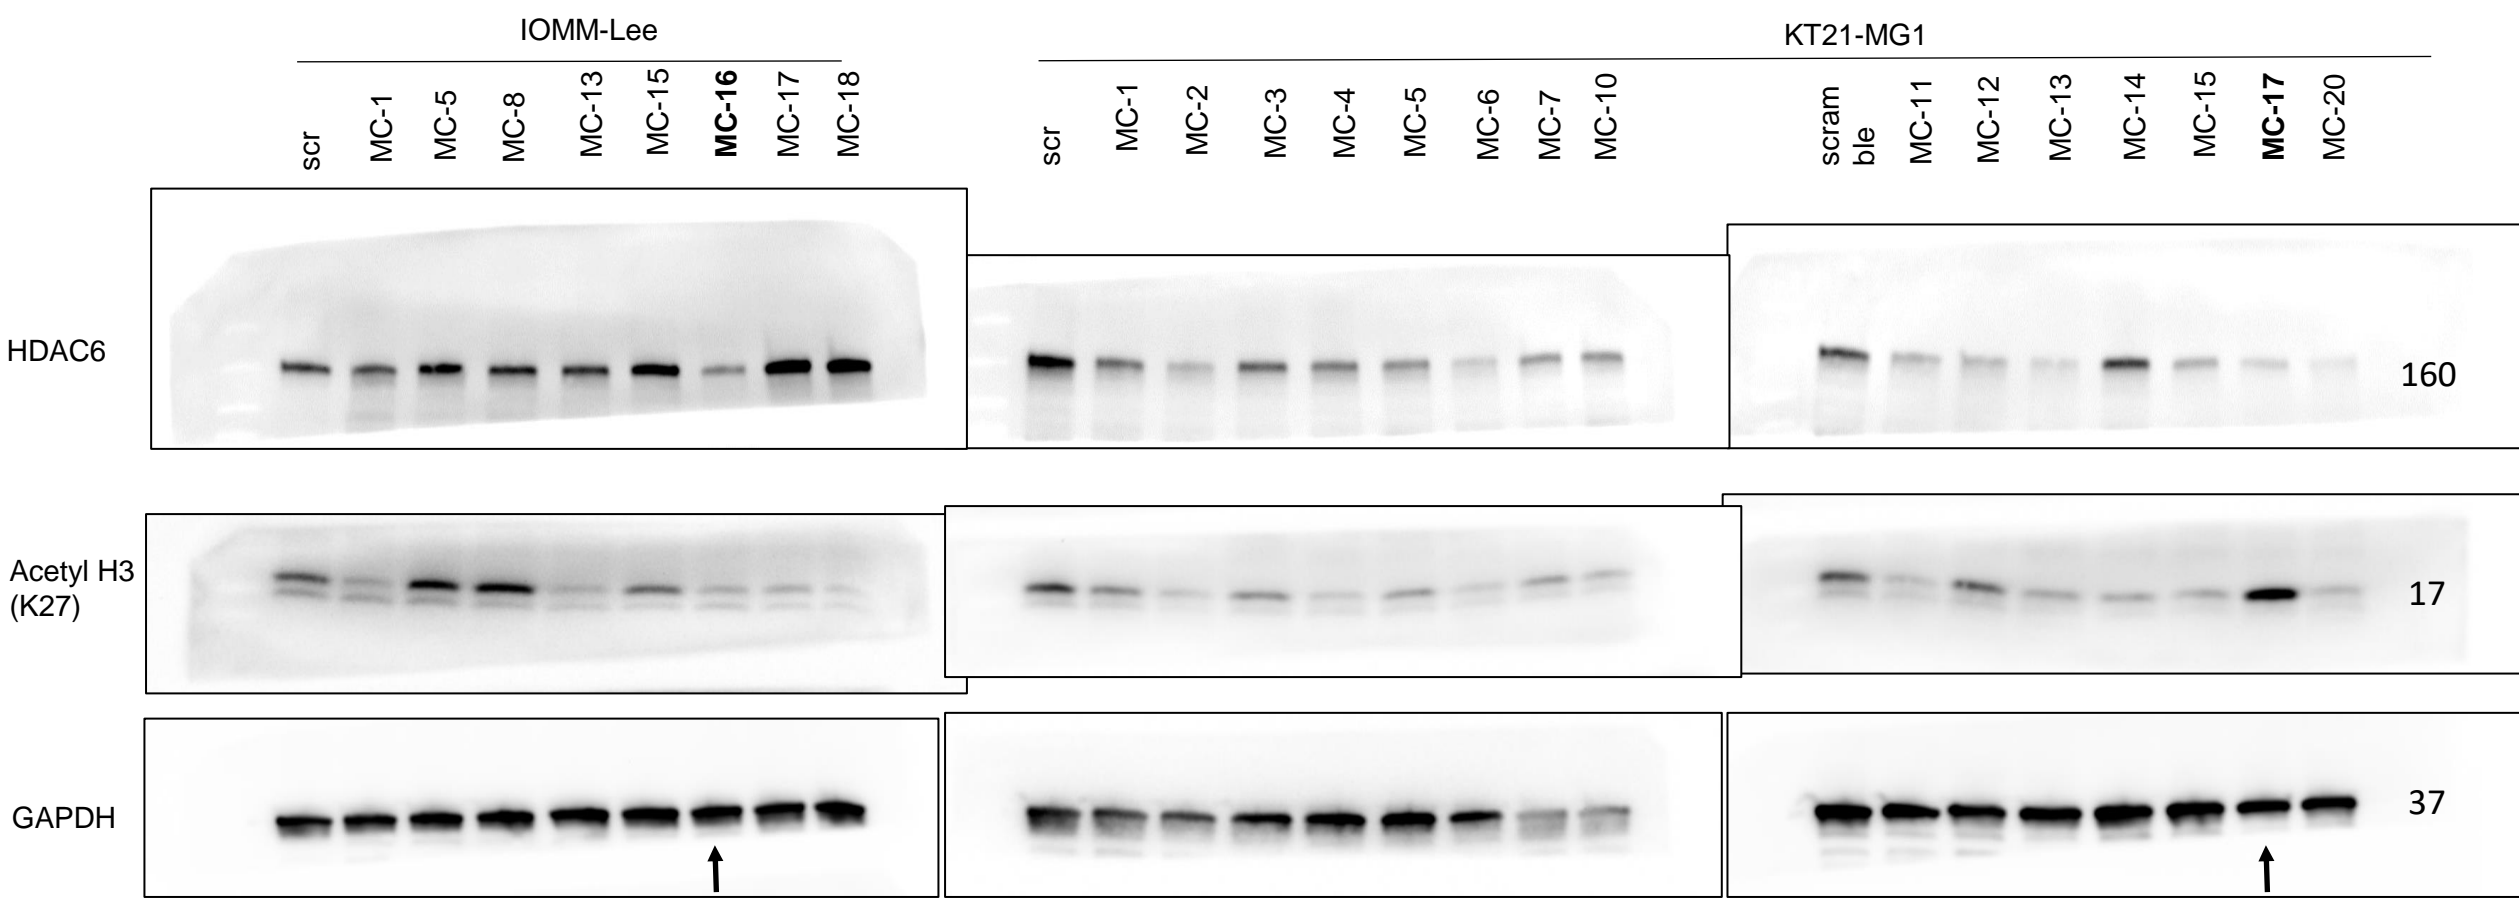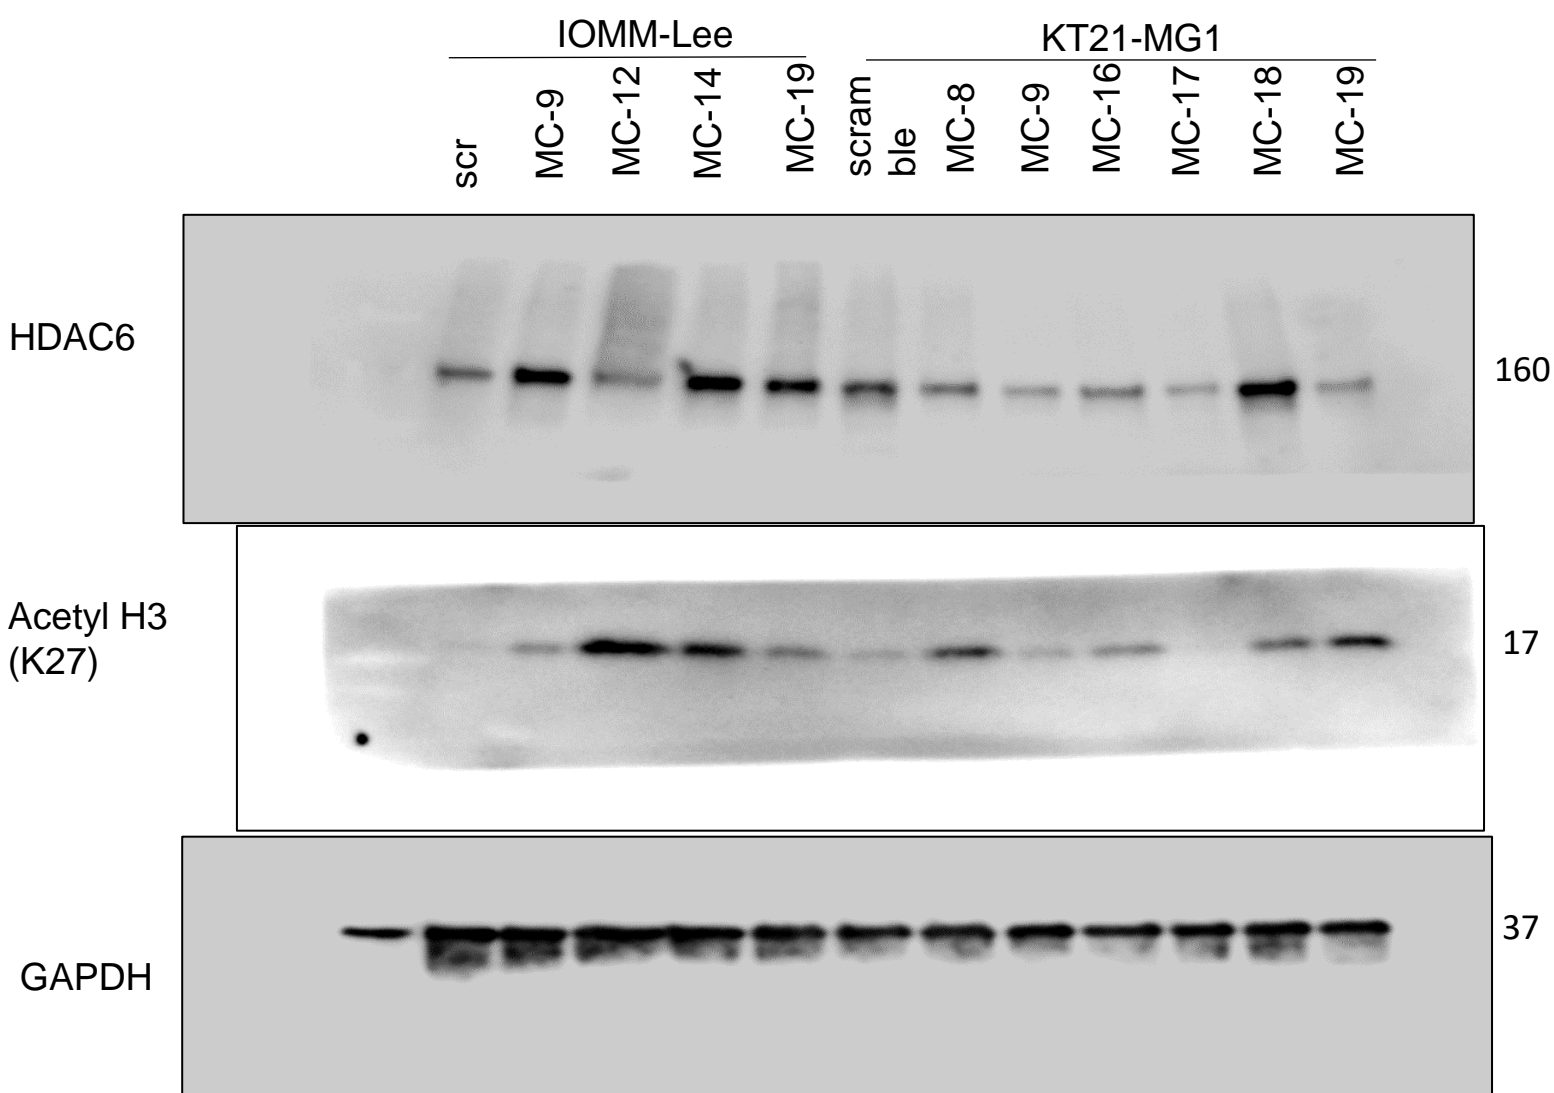

The markers are continued in the next page



Supplementary Figure S4

250  
150  
100  
75

50  
37  
25  
20  
15  
10

a

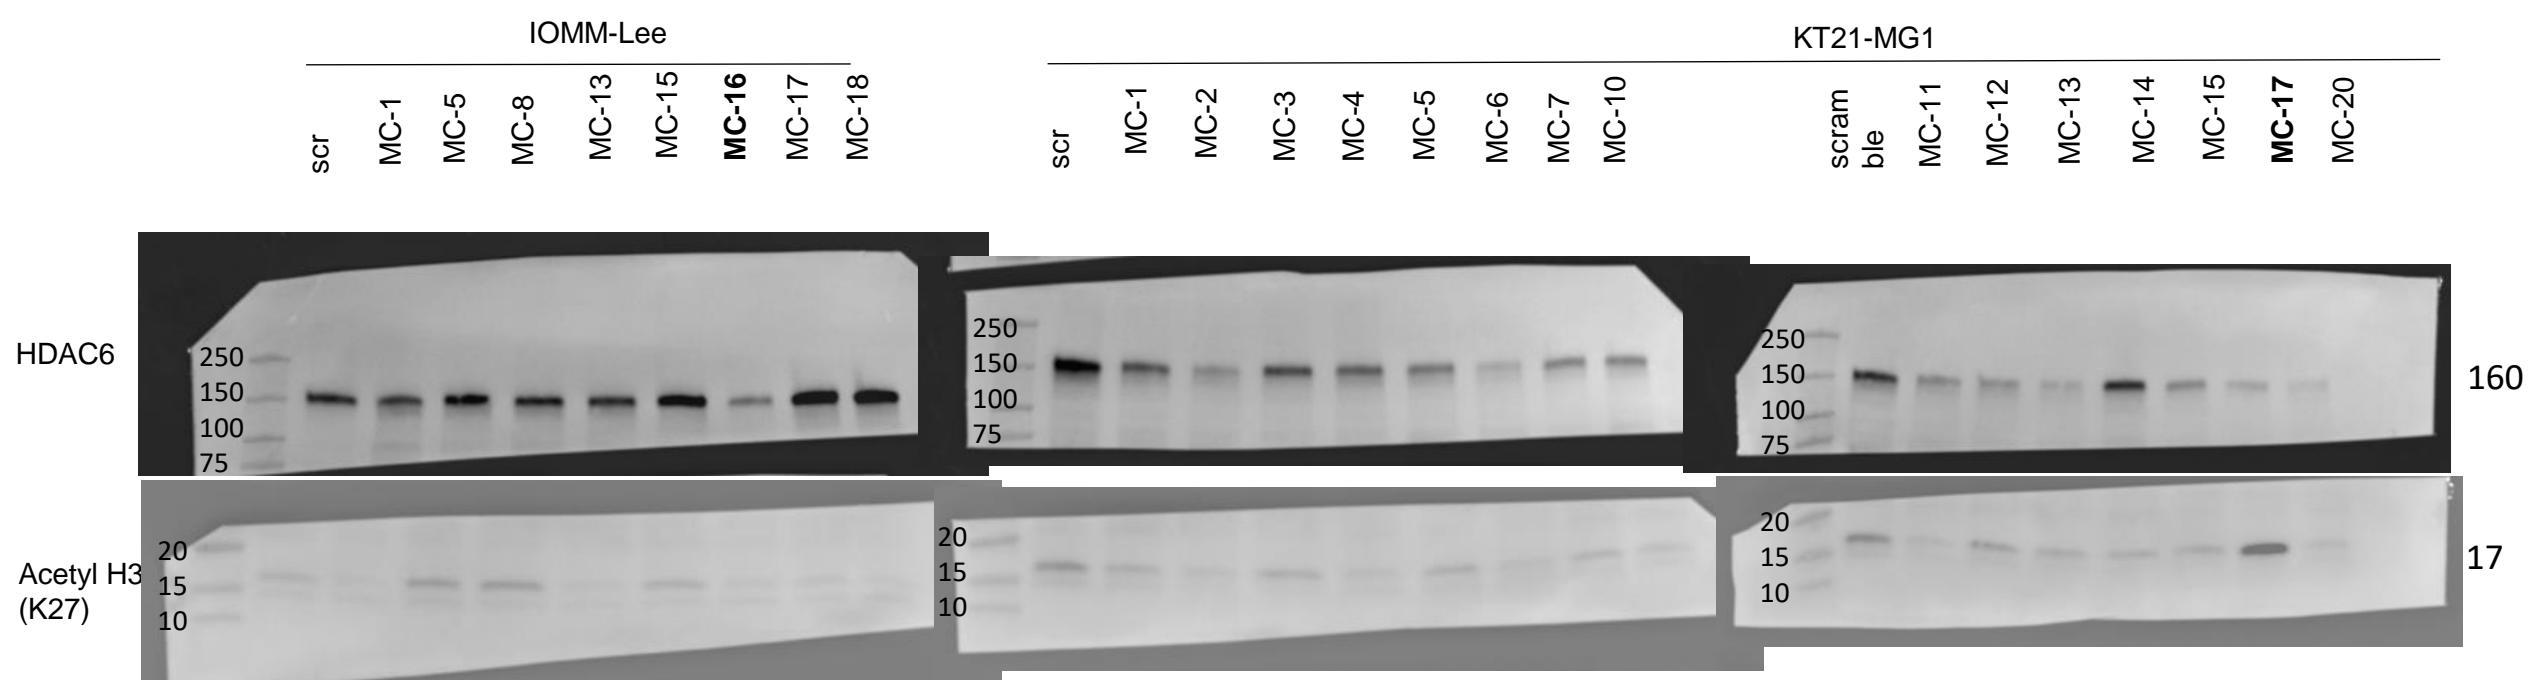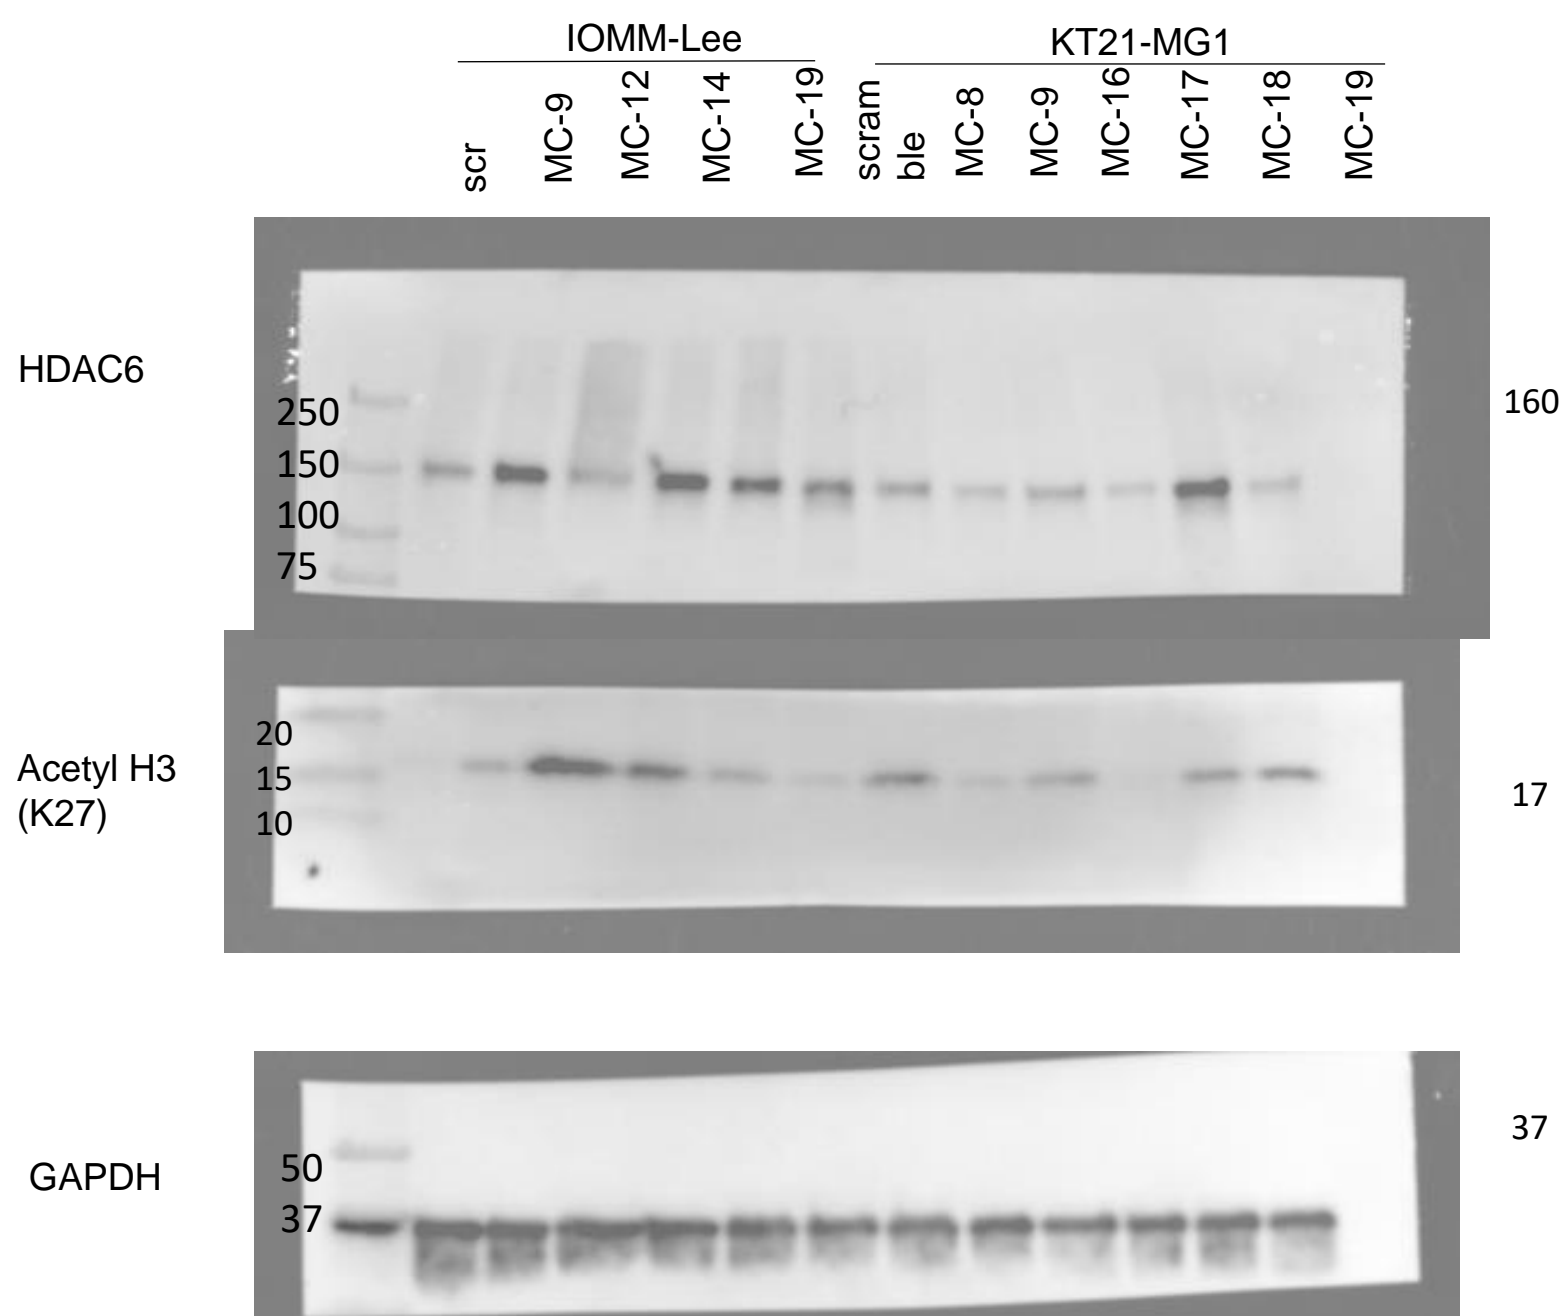

**b**

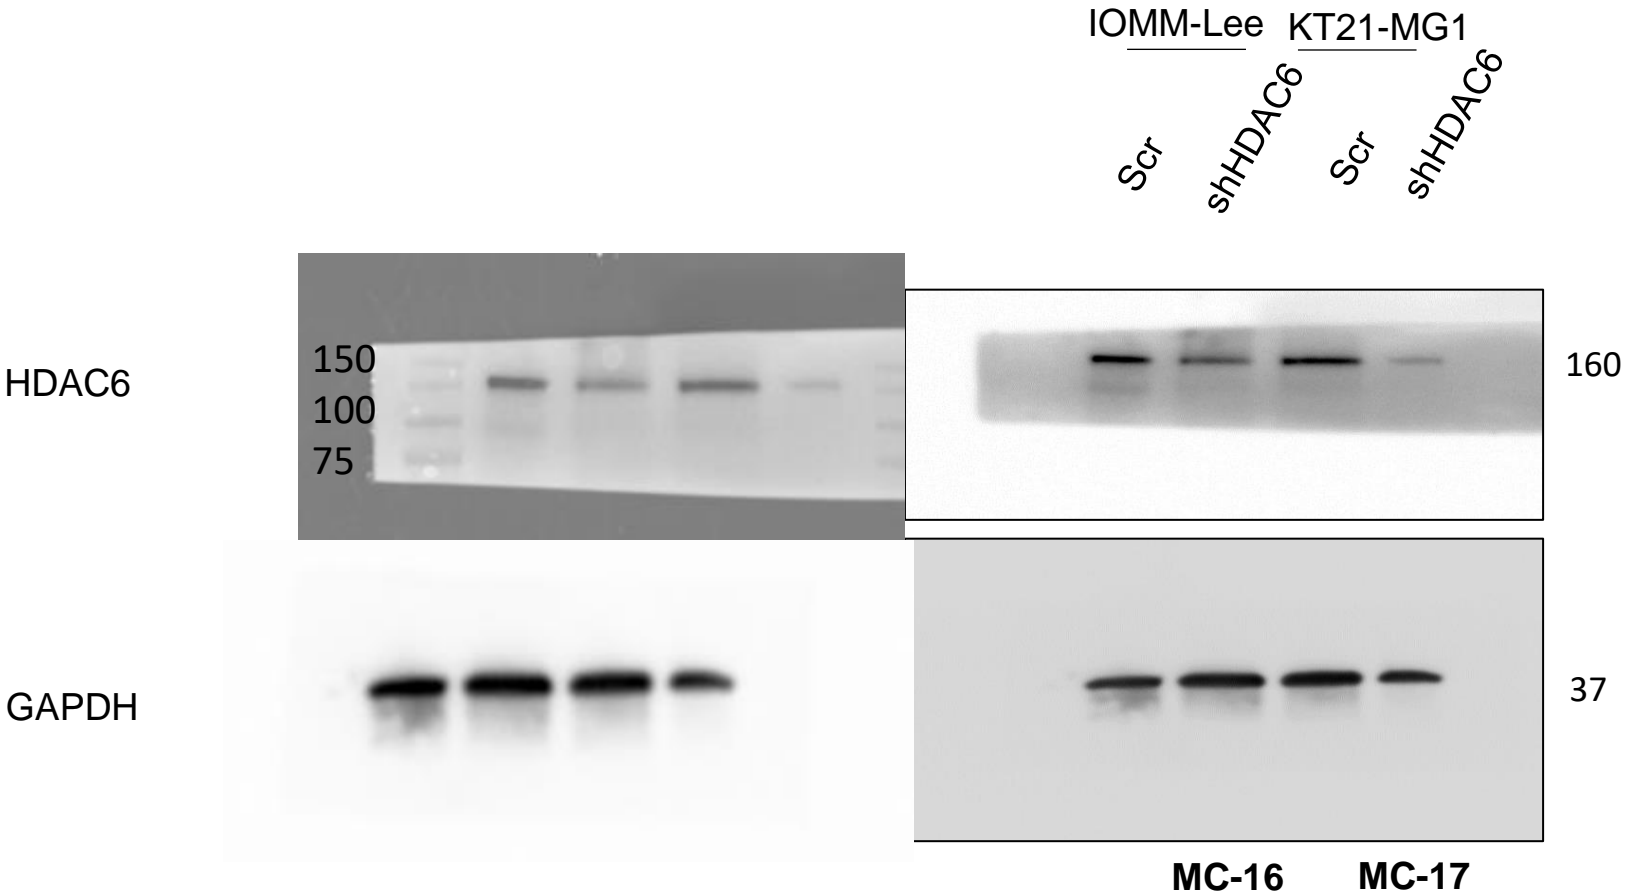

f

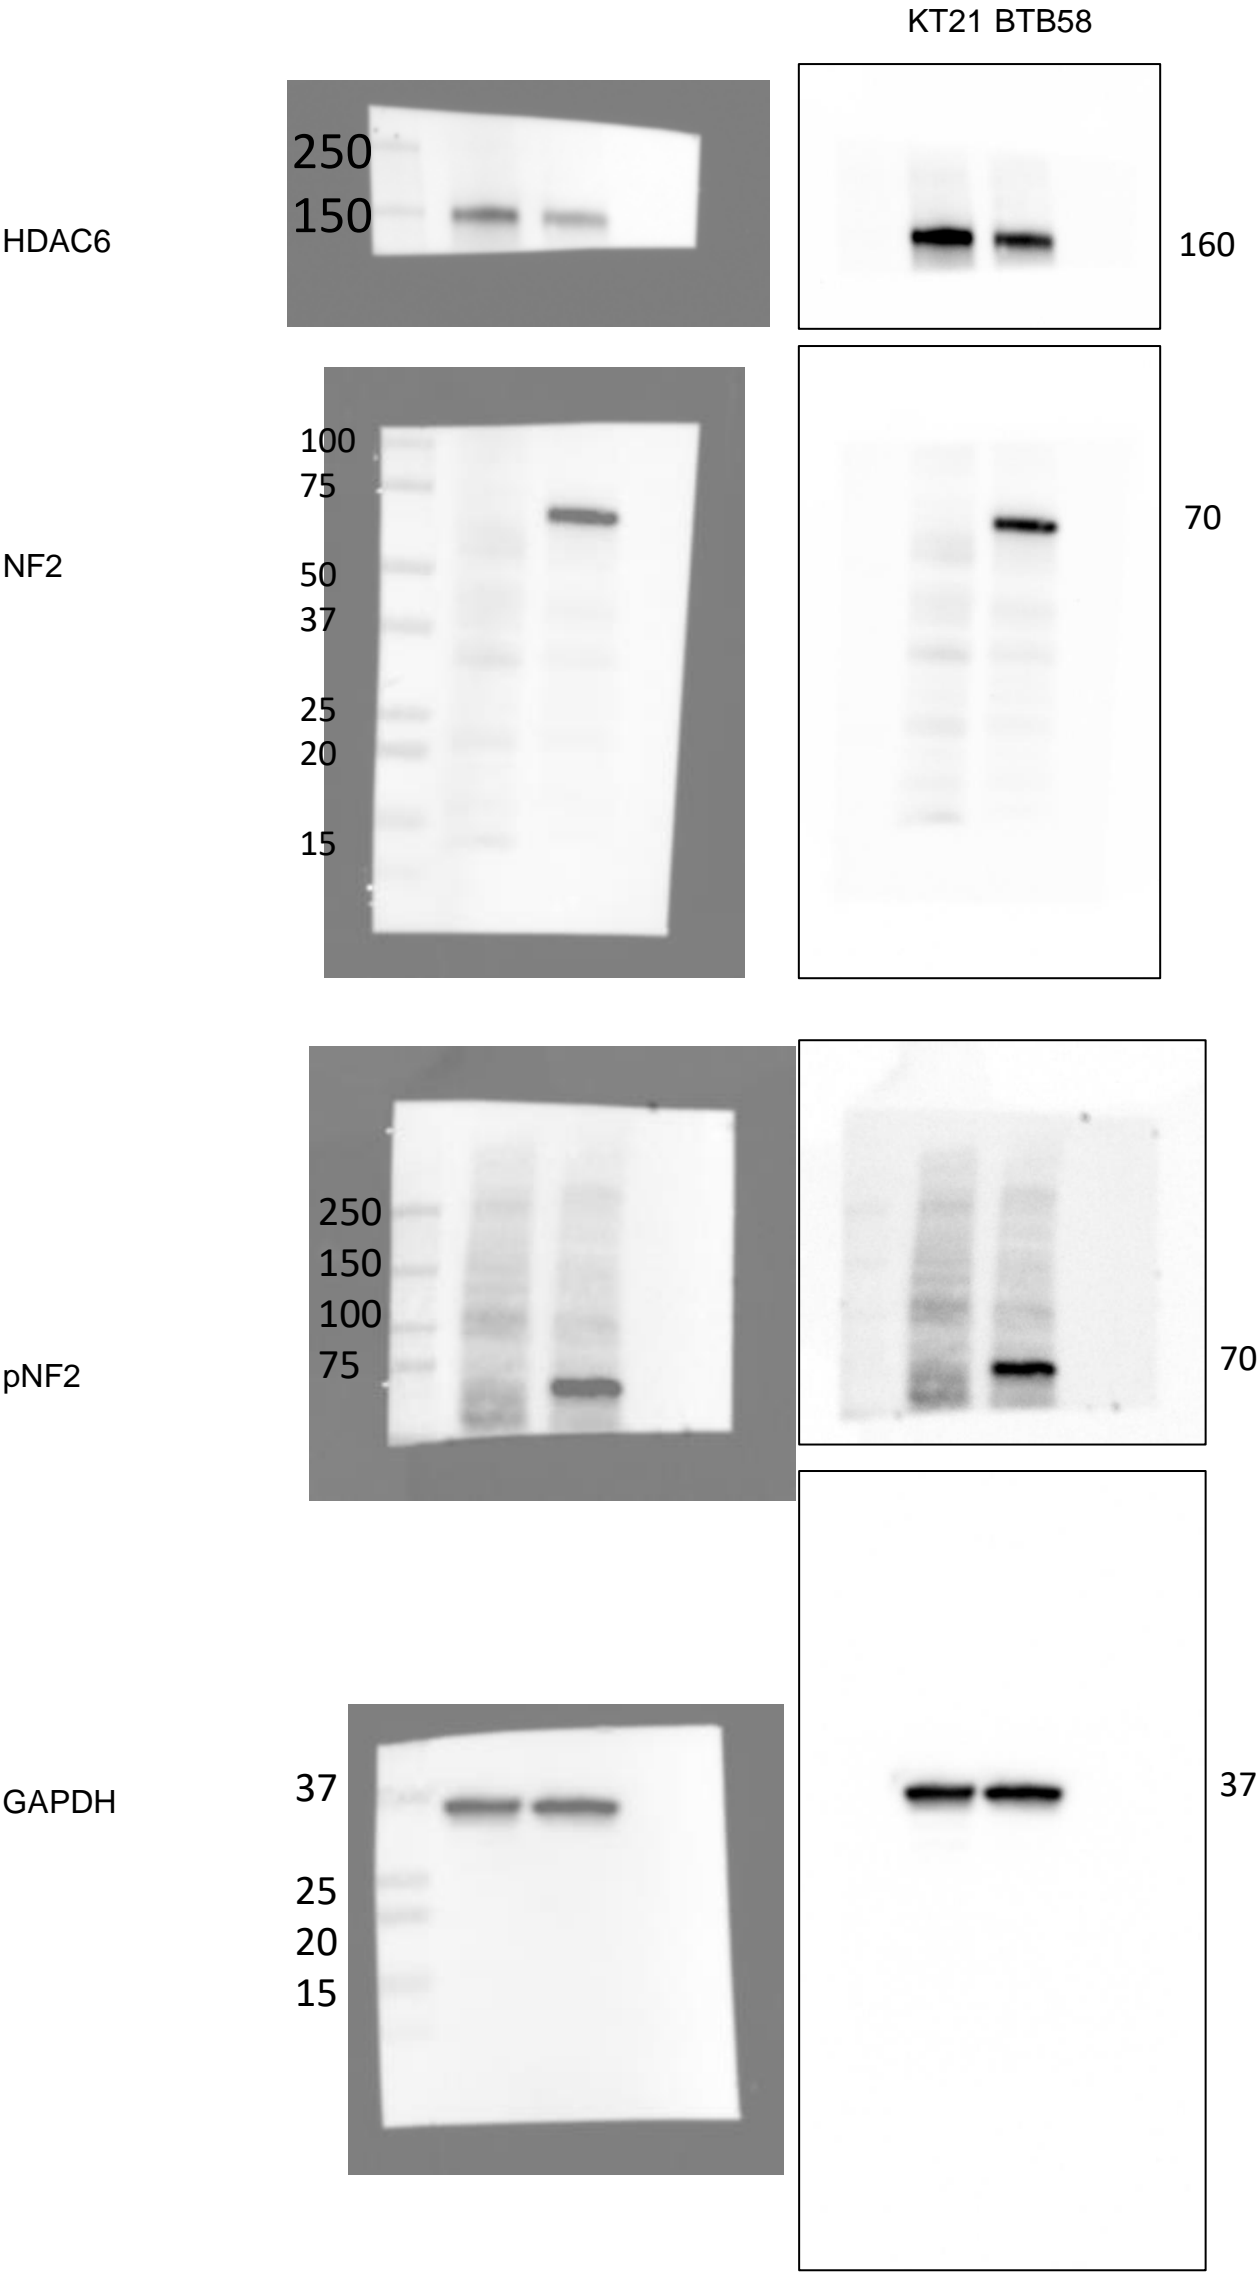

Supplementary Figure S8

a

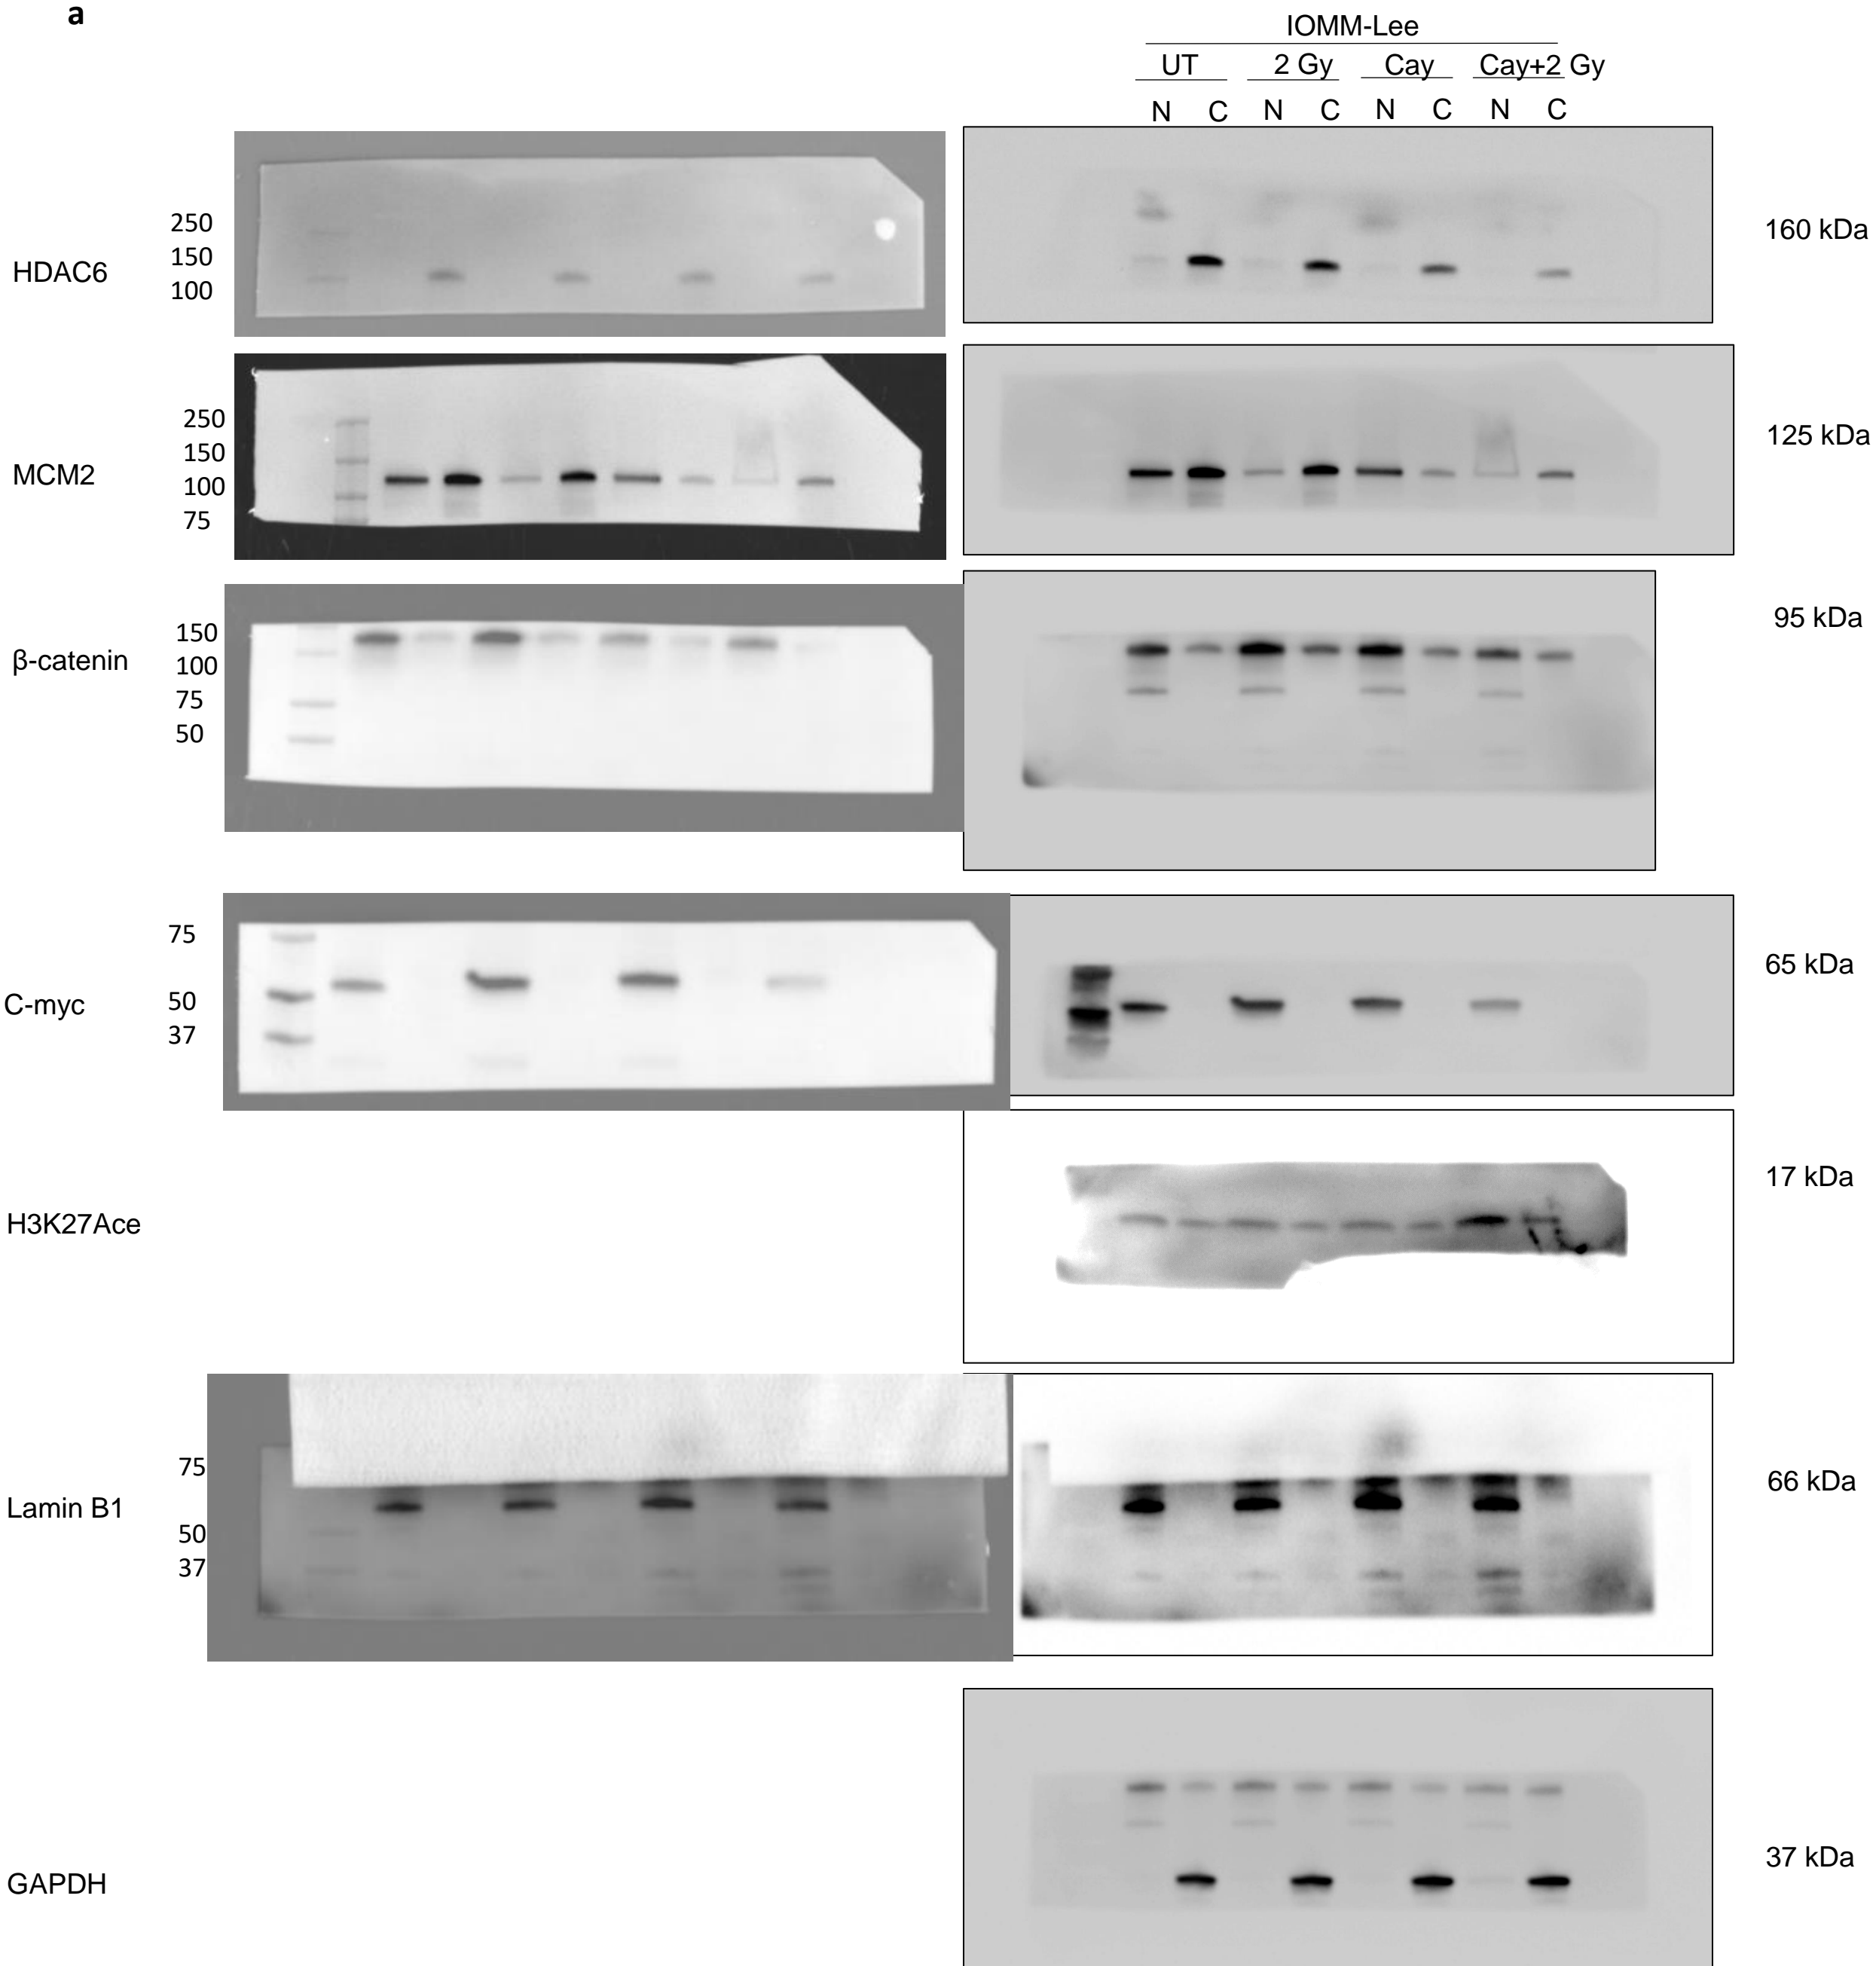

Supplementary Figure S8

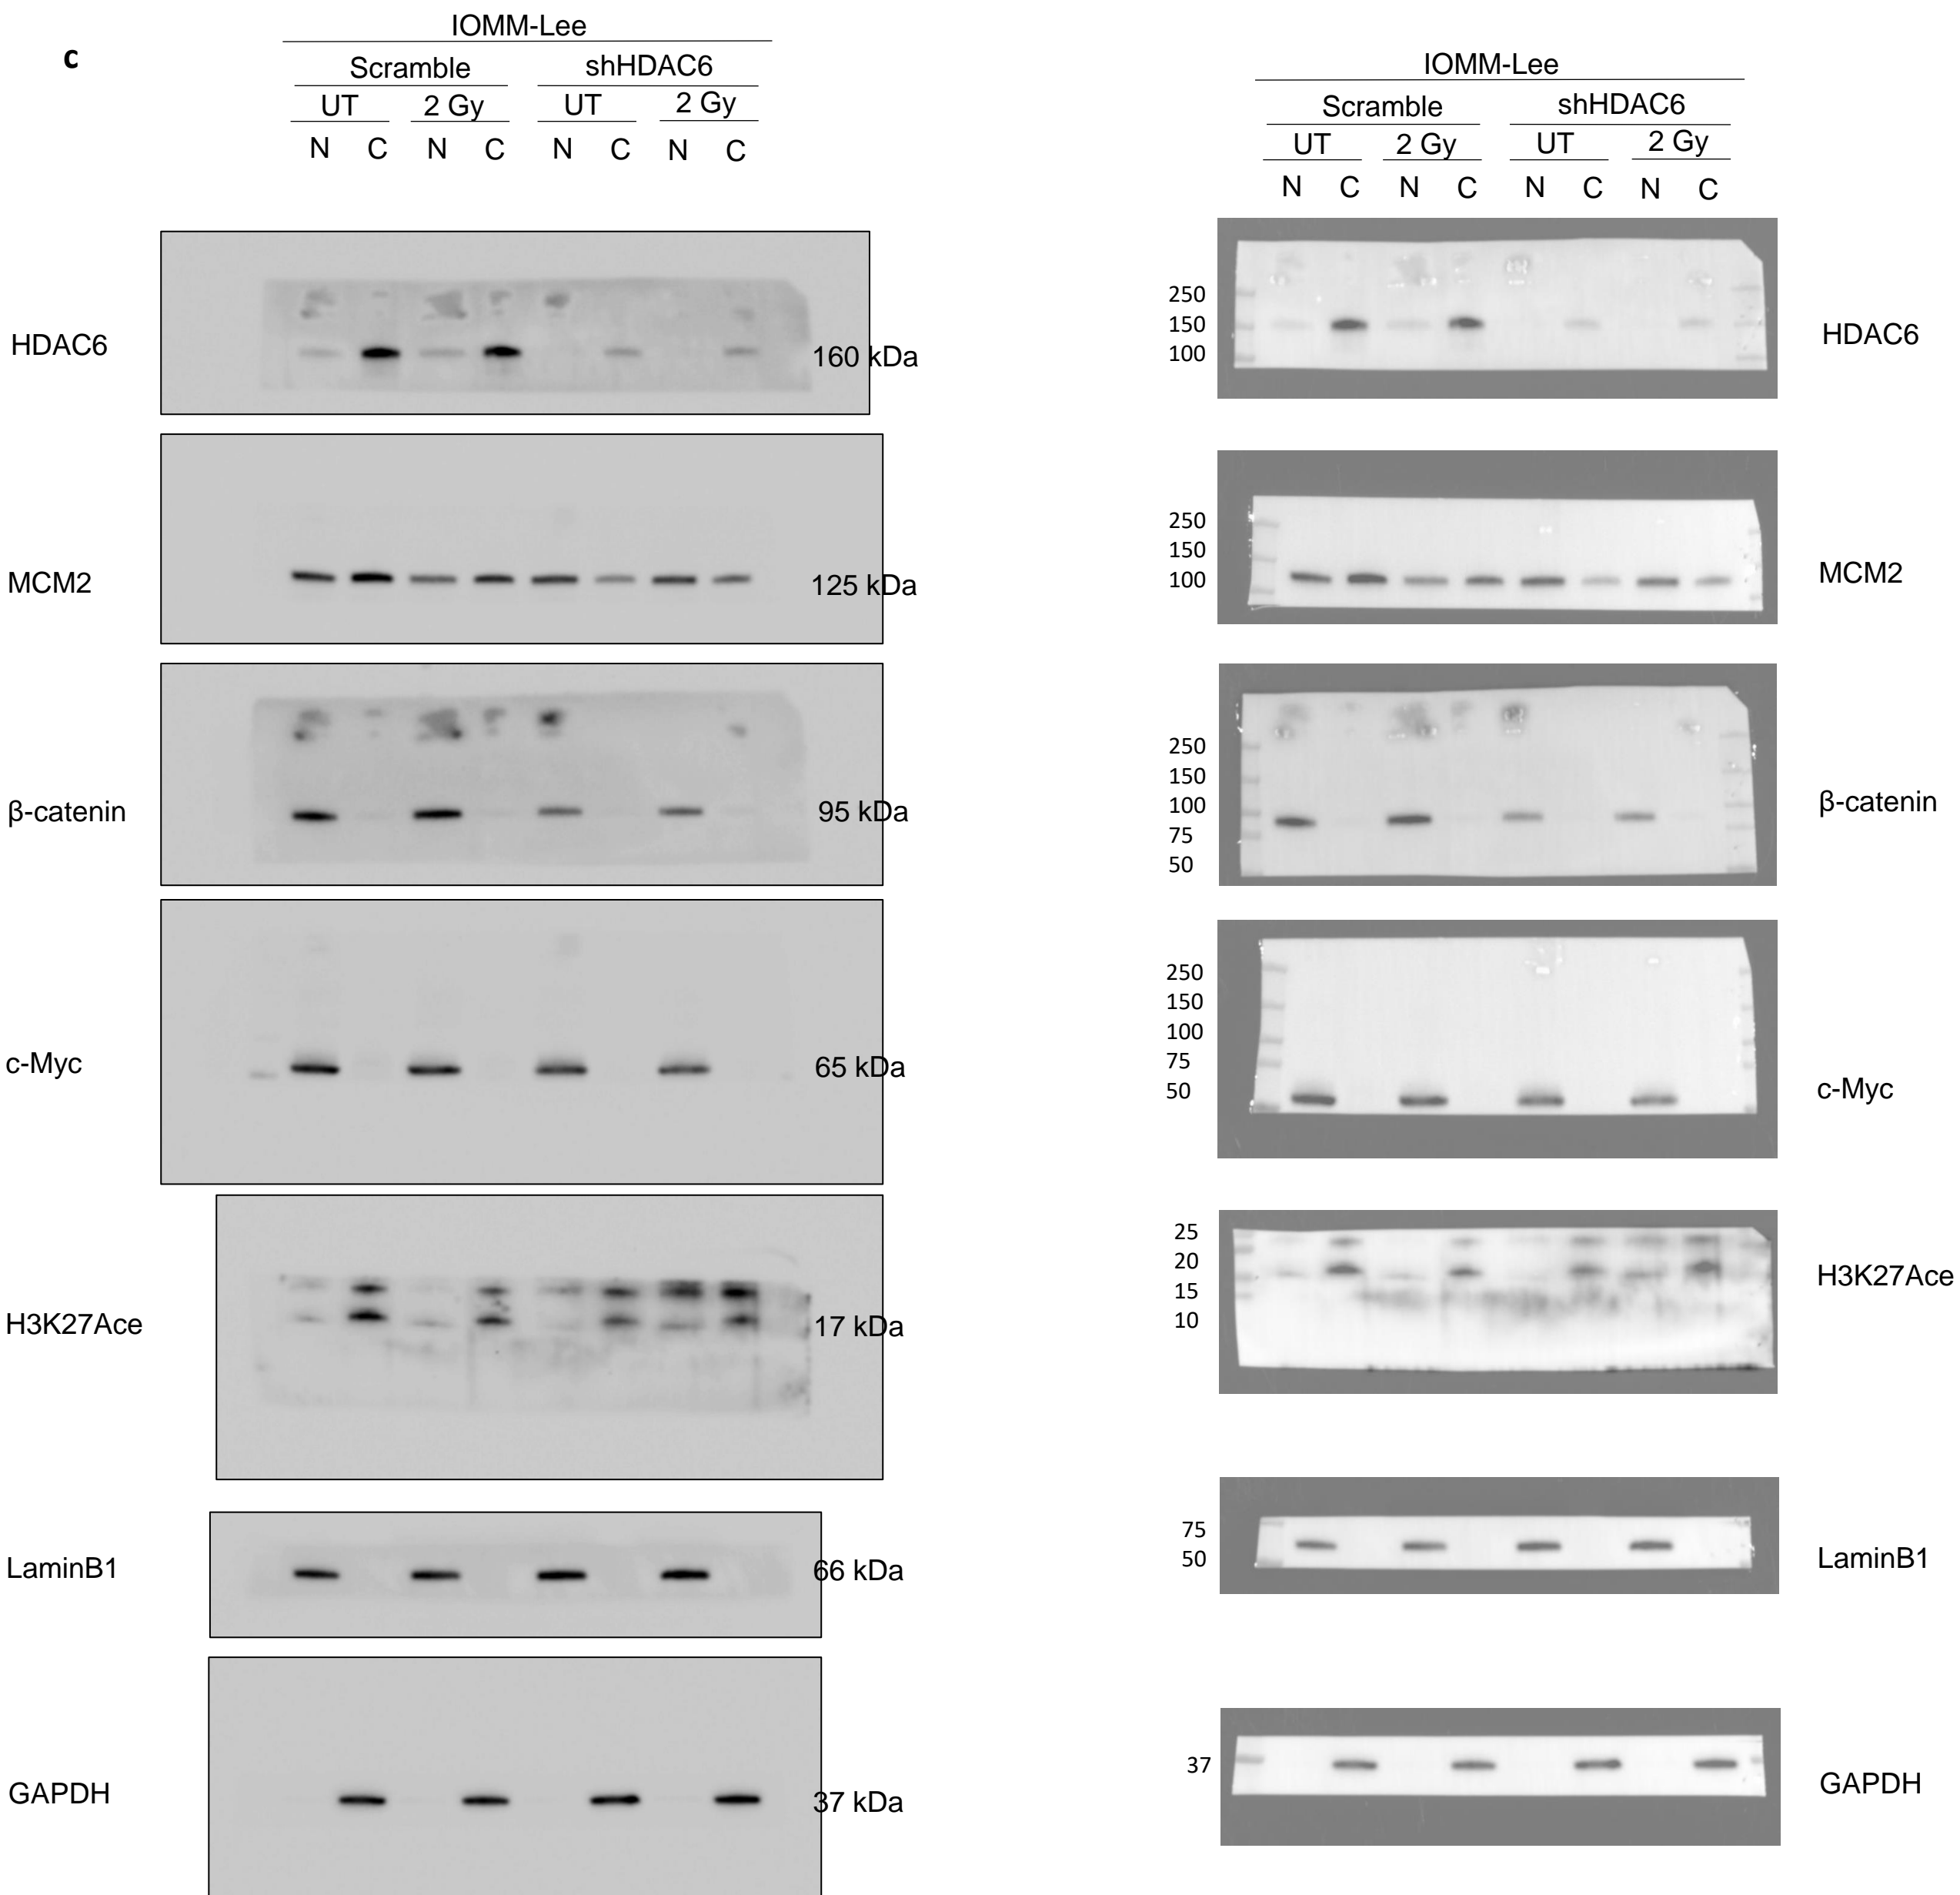

# Supplementary Figure S9

a

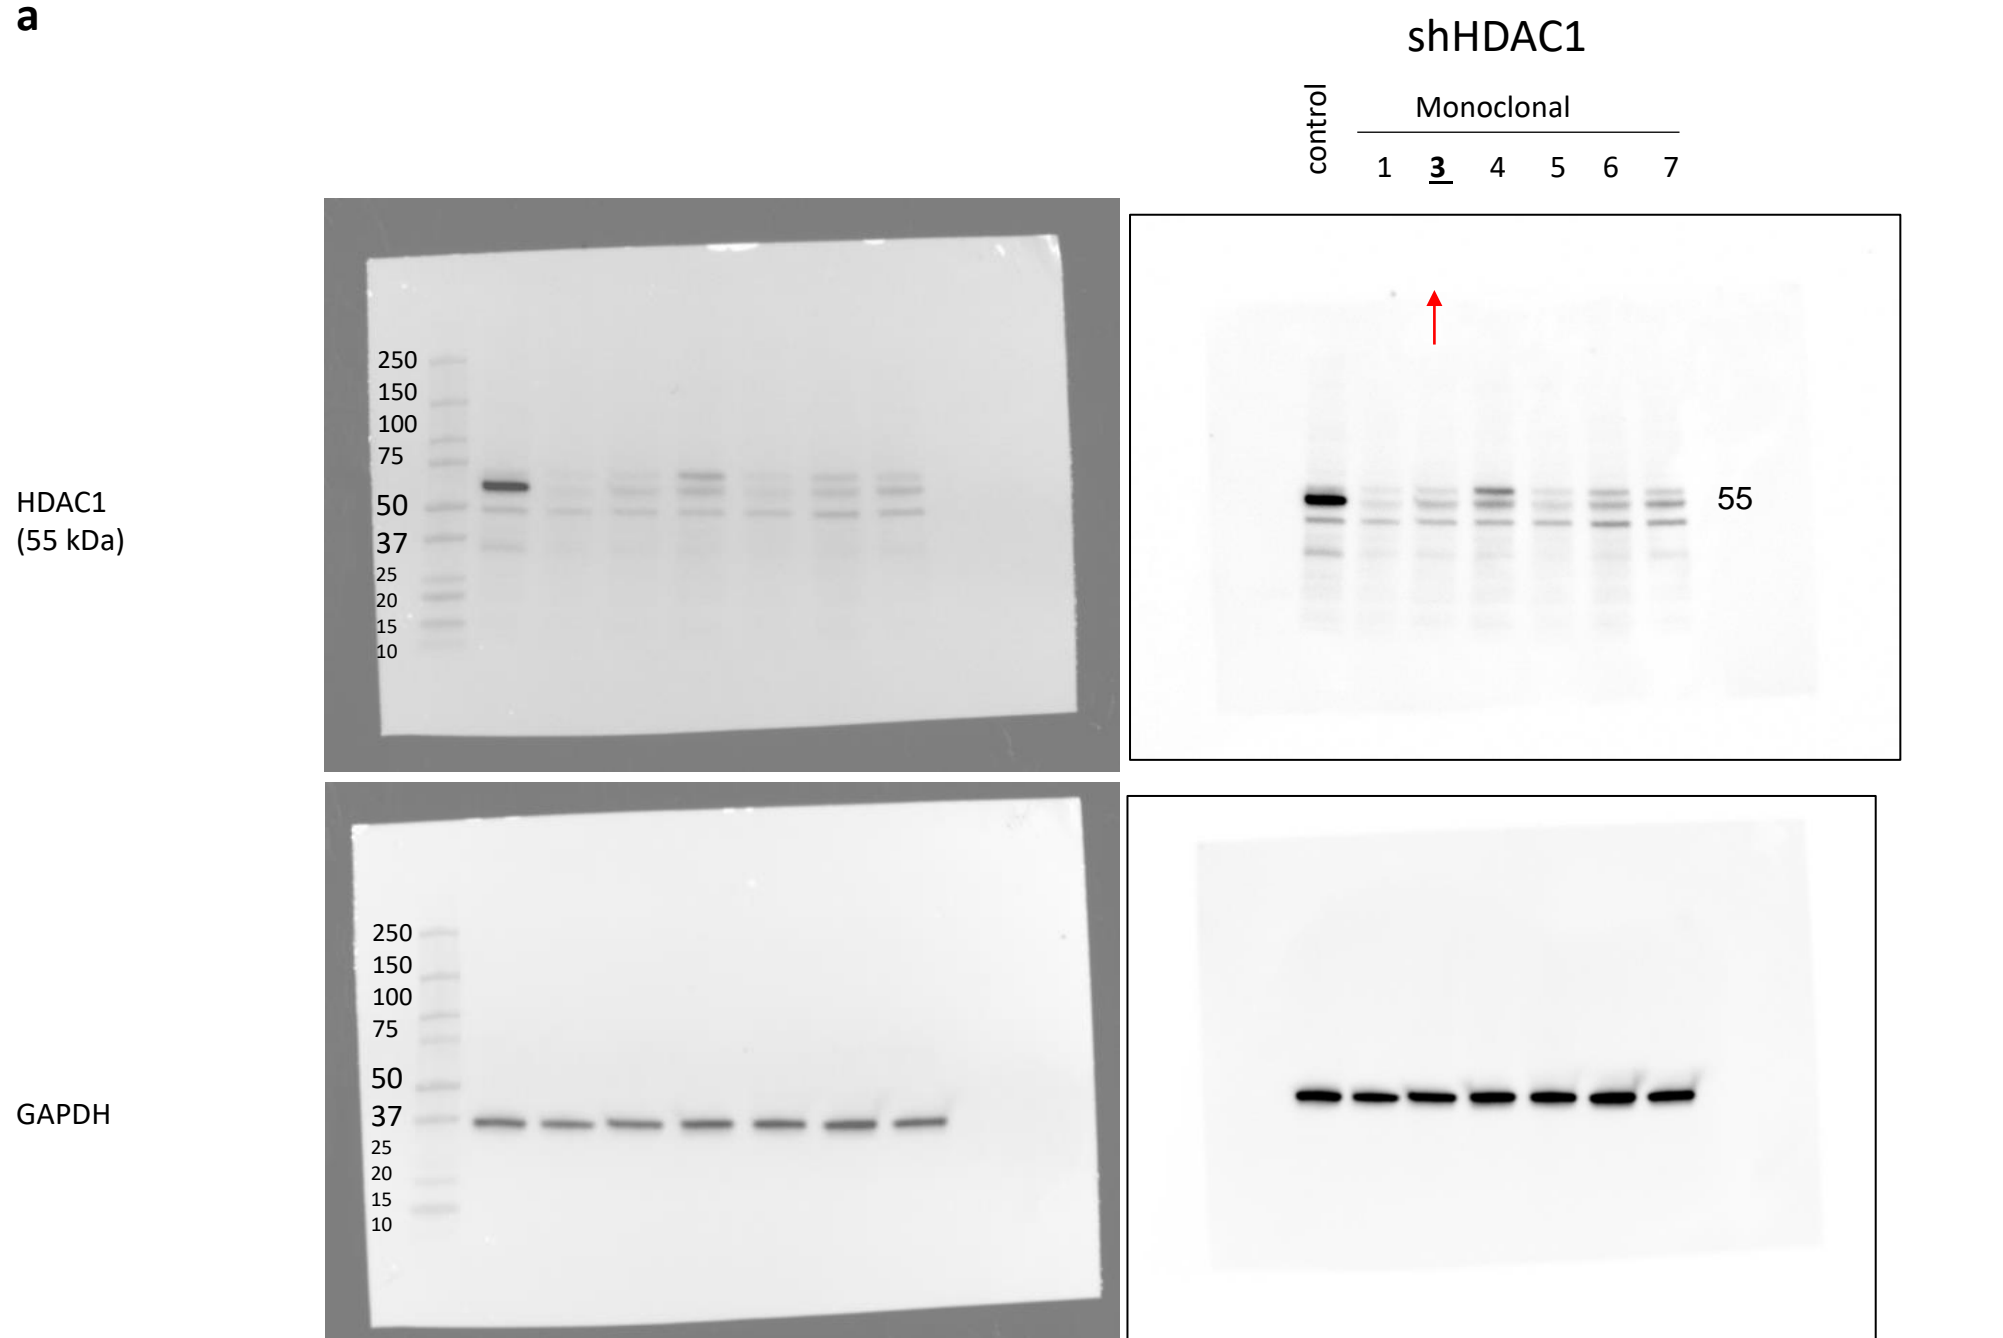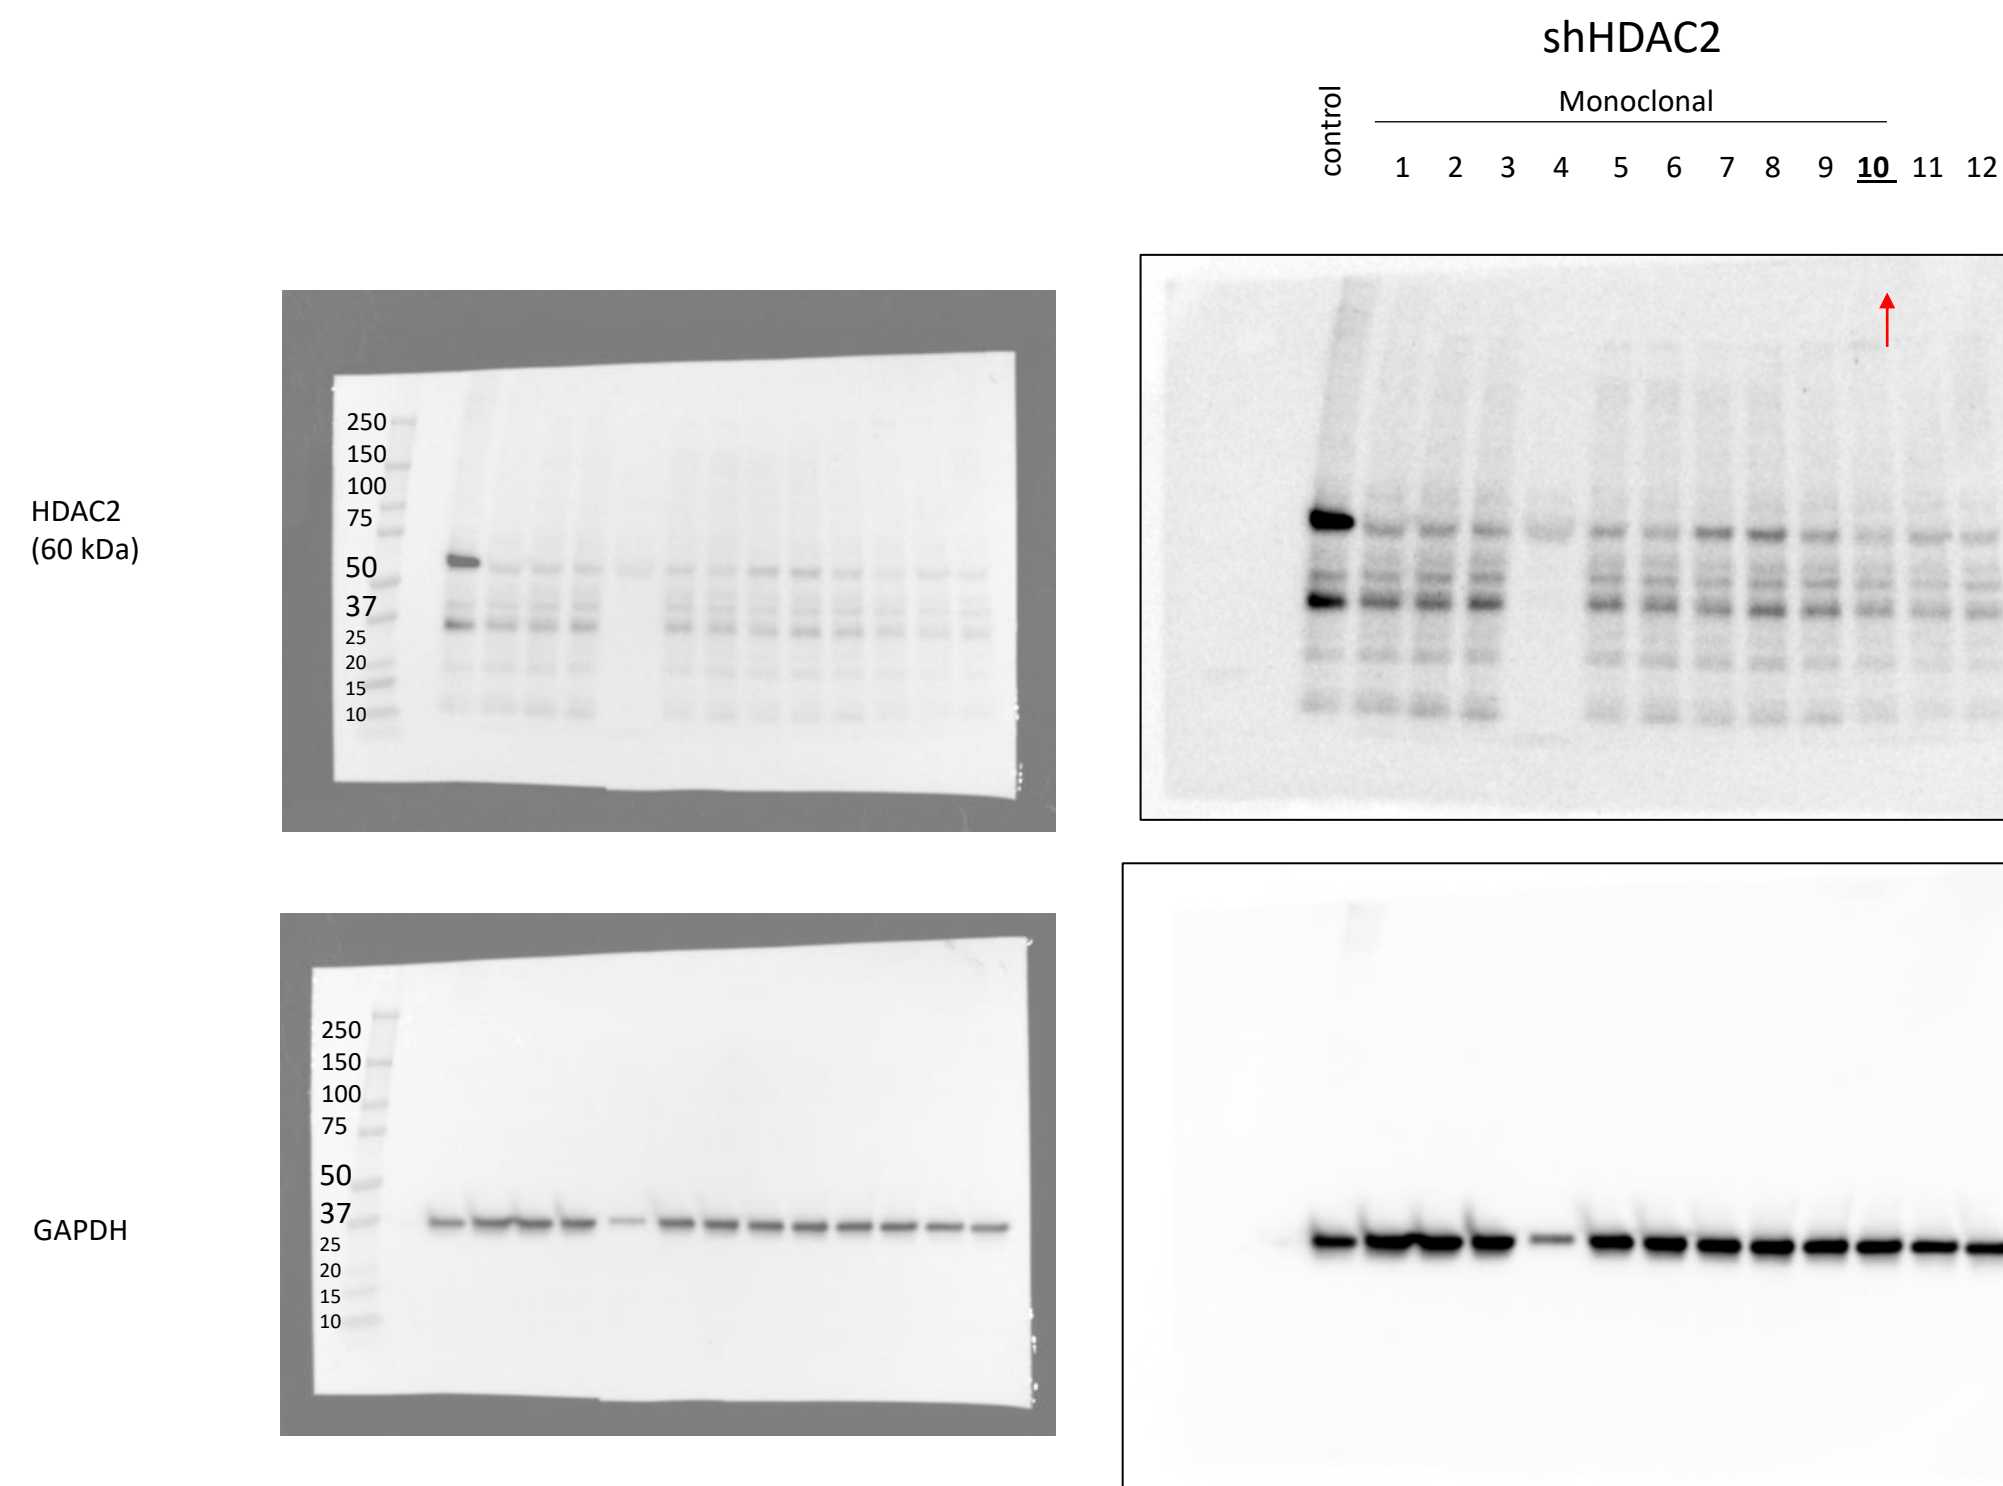



Supplementary Figure S9

HDAC3  
(49 kDa)

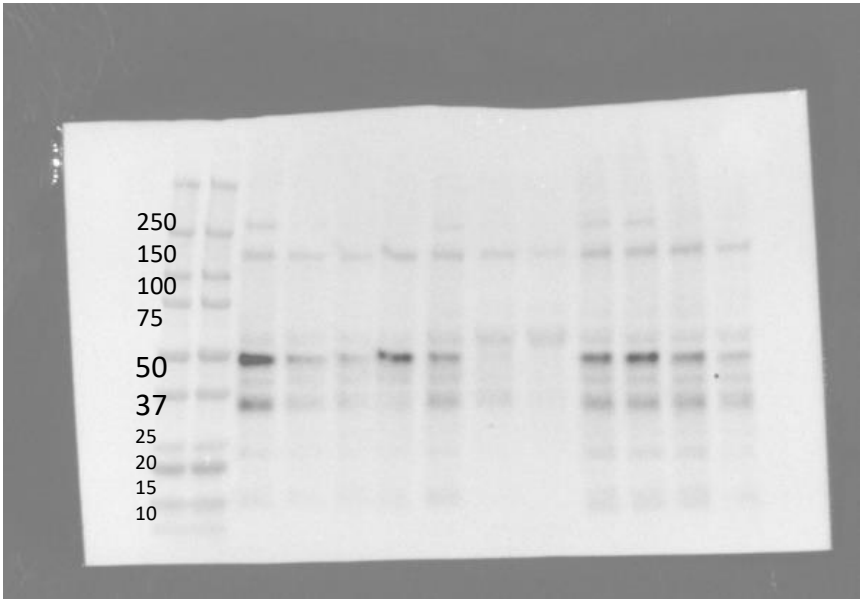

GAPDH

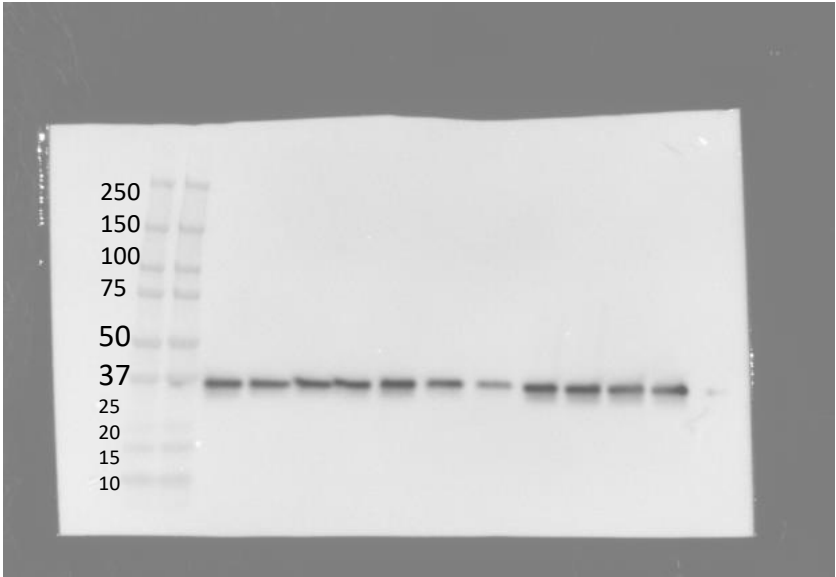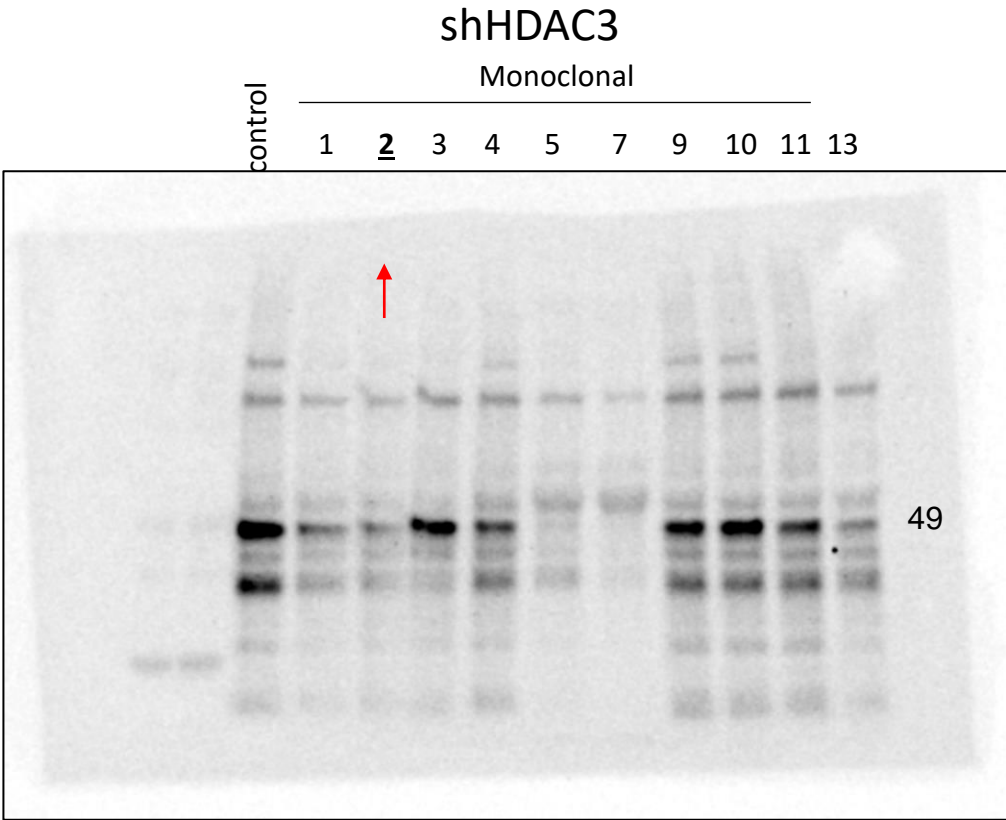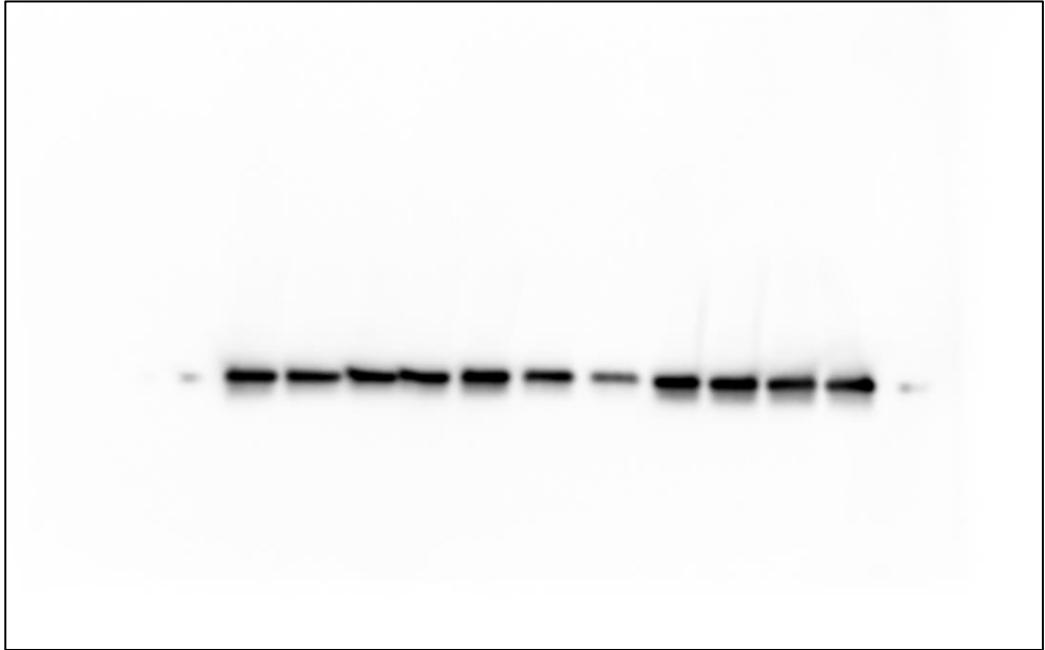

Supplementary Figure S9

**b**

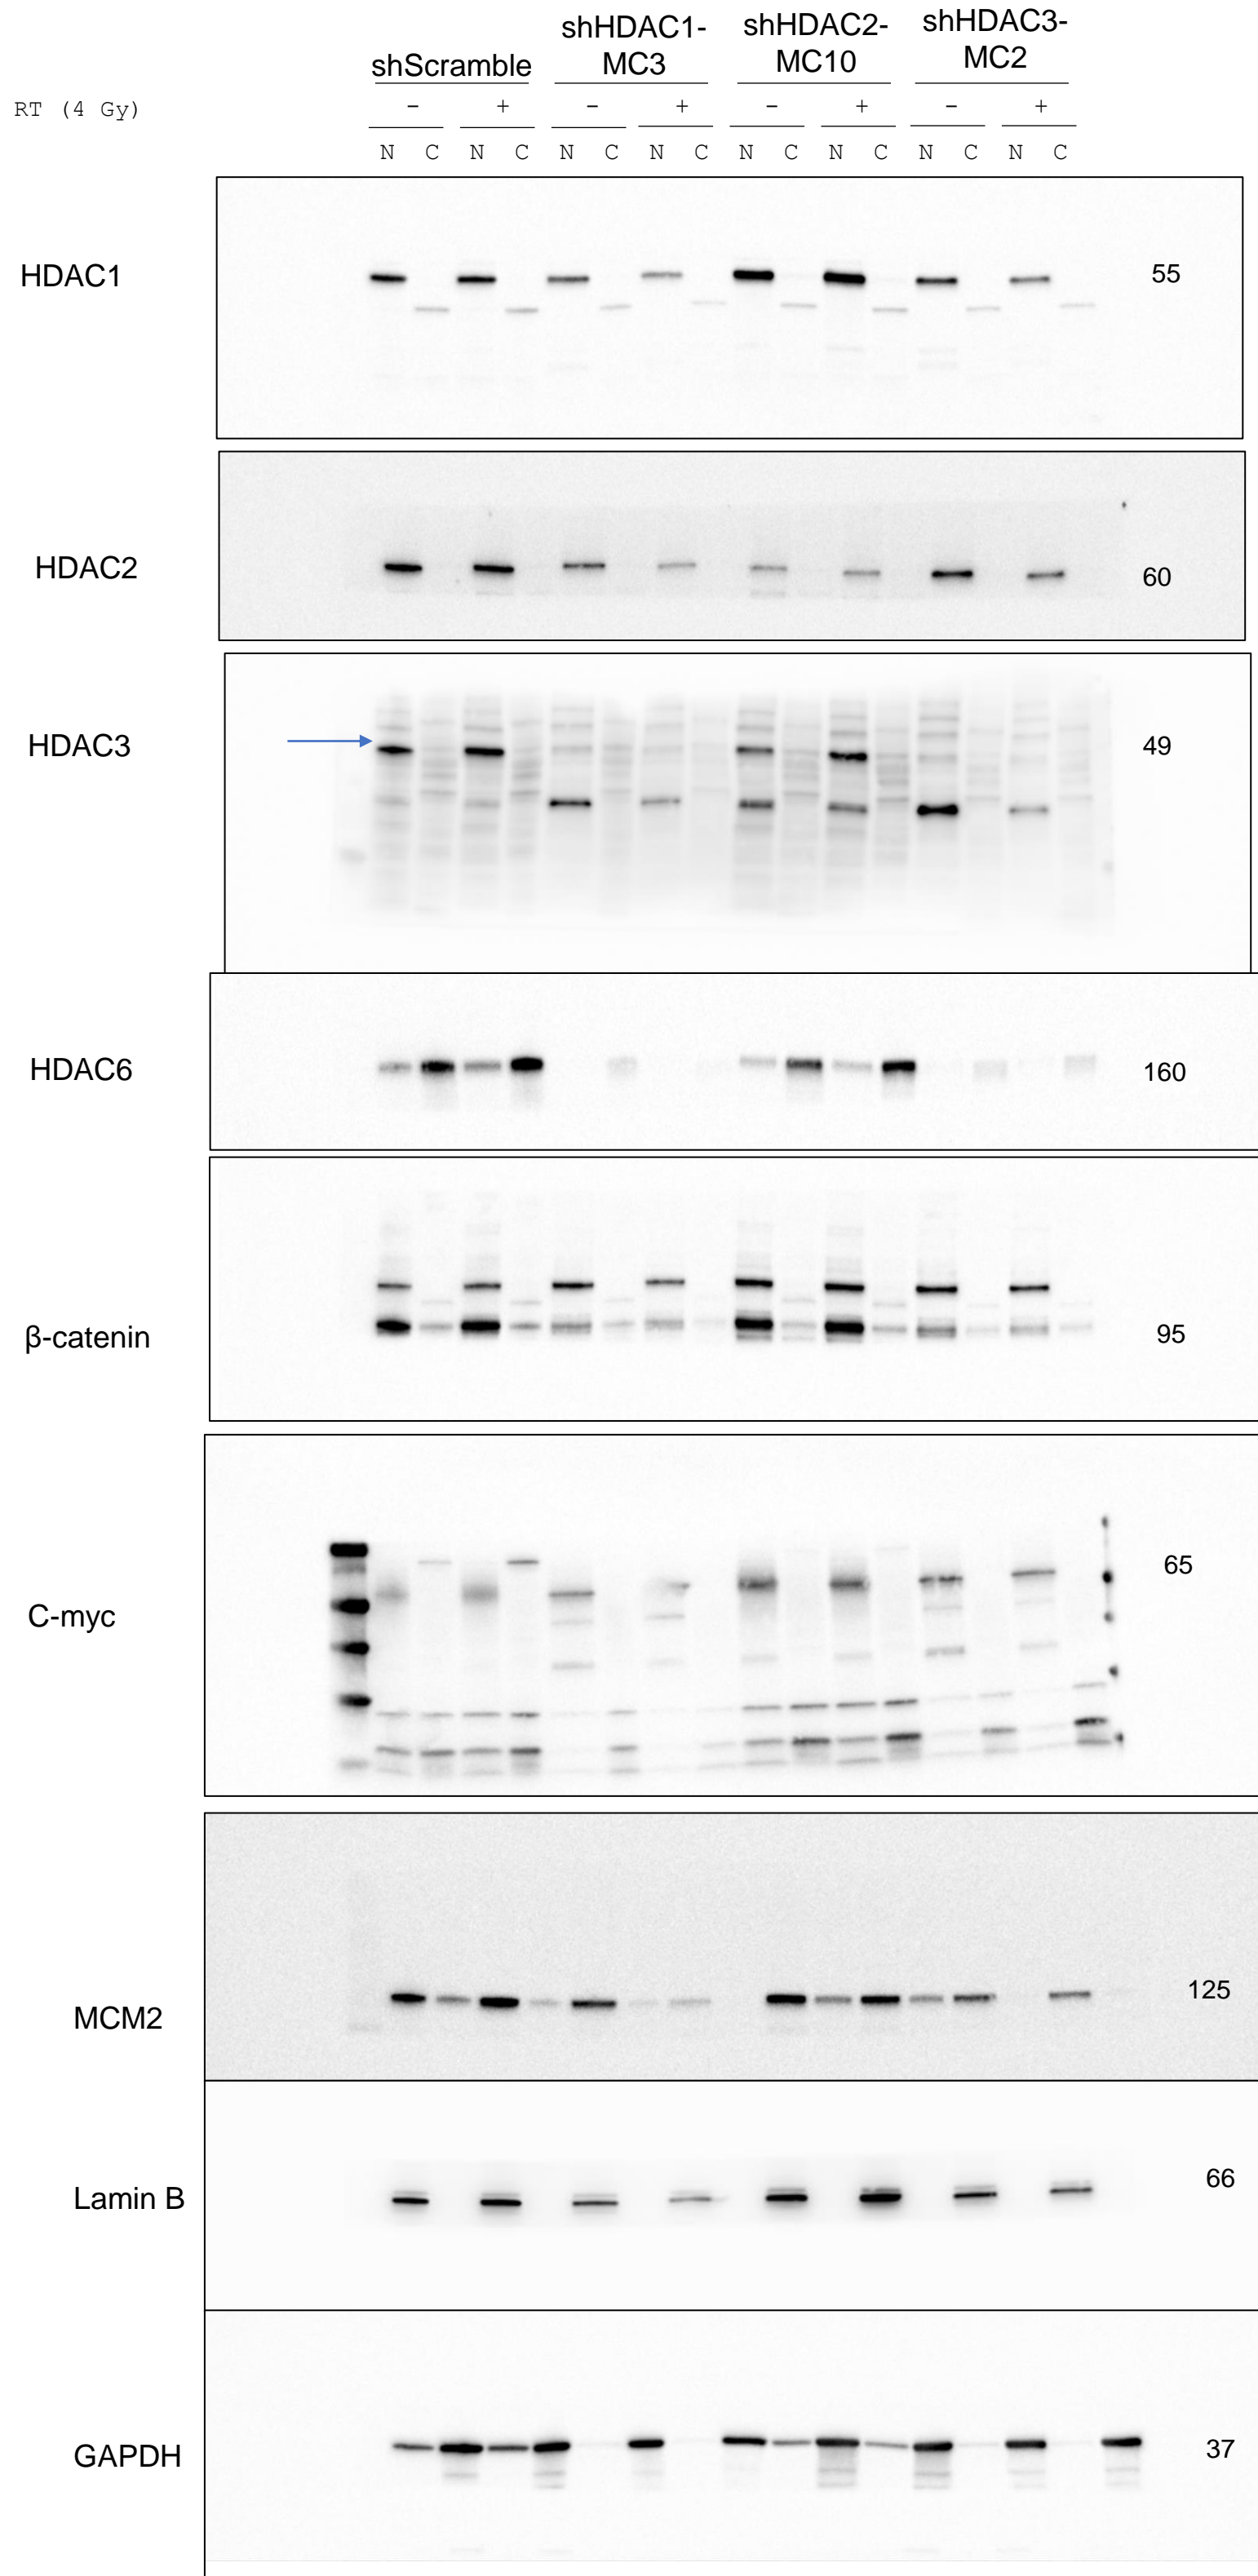

The markers are continued in the next page

**Supplementary Figure S9**

**b**

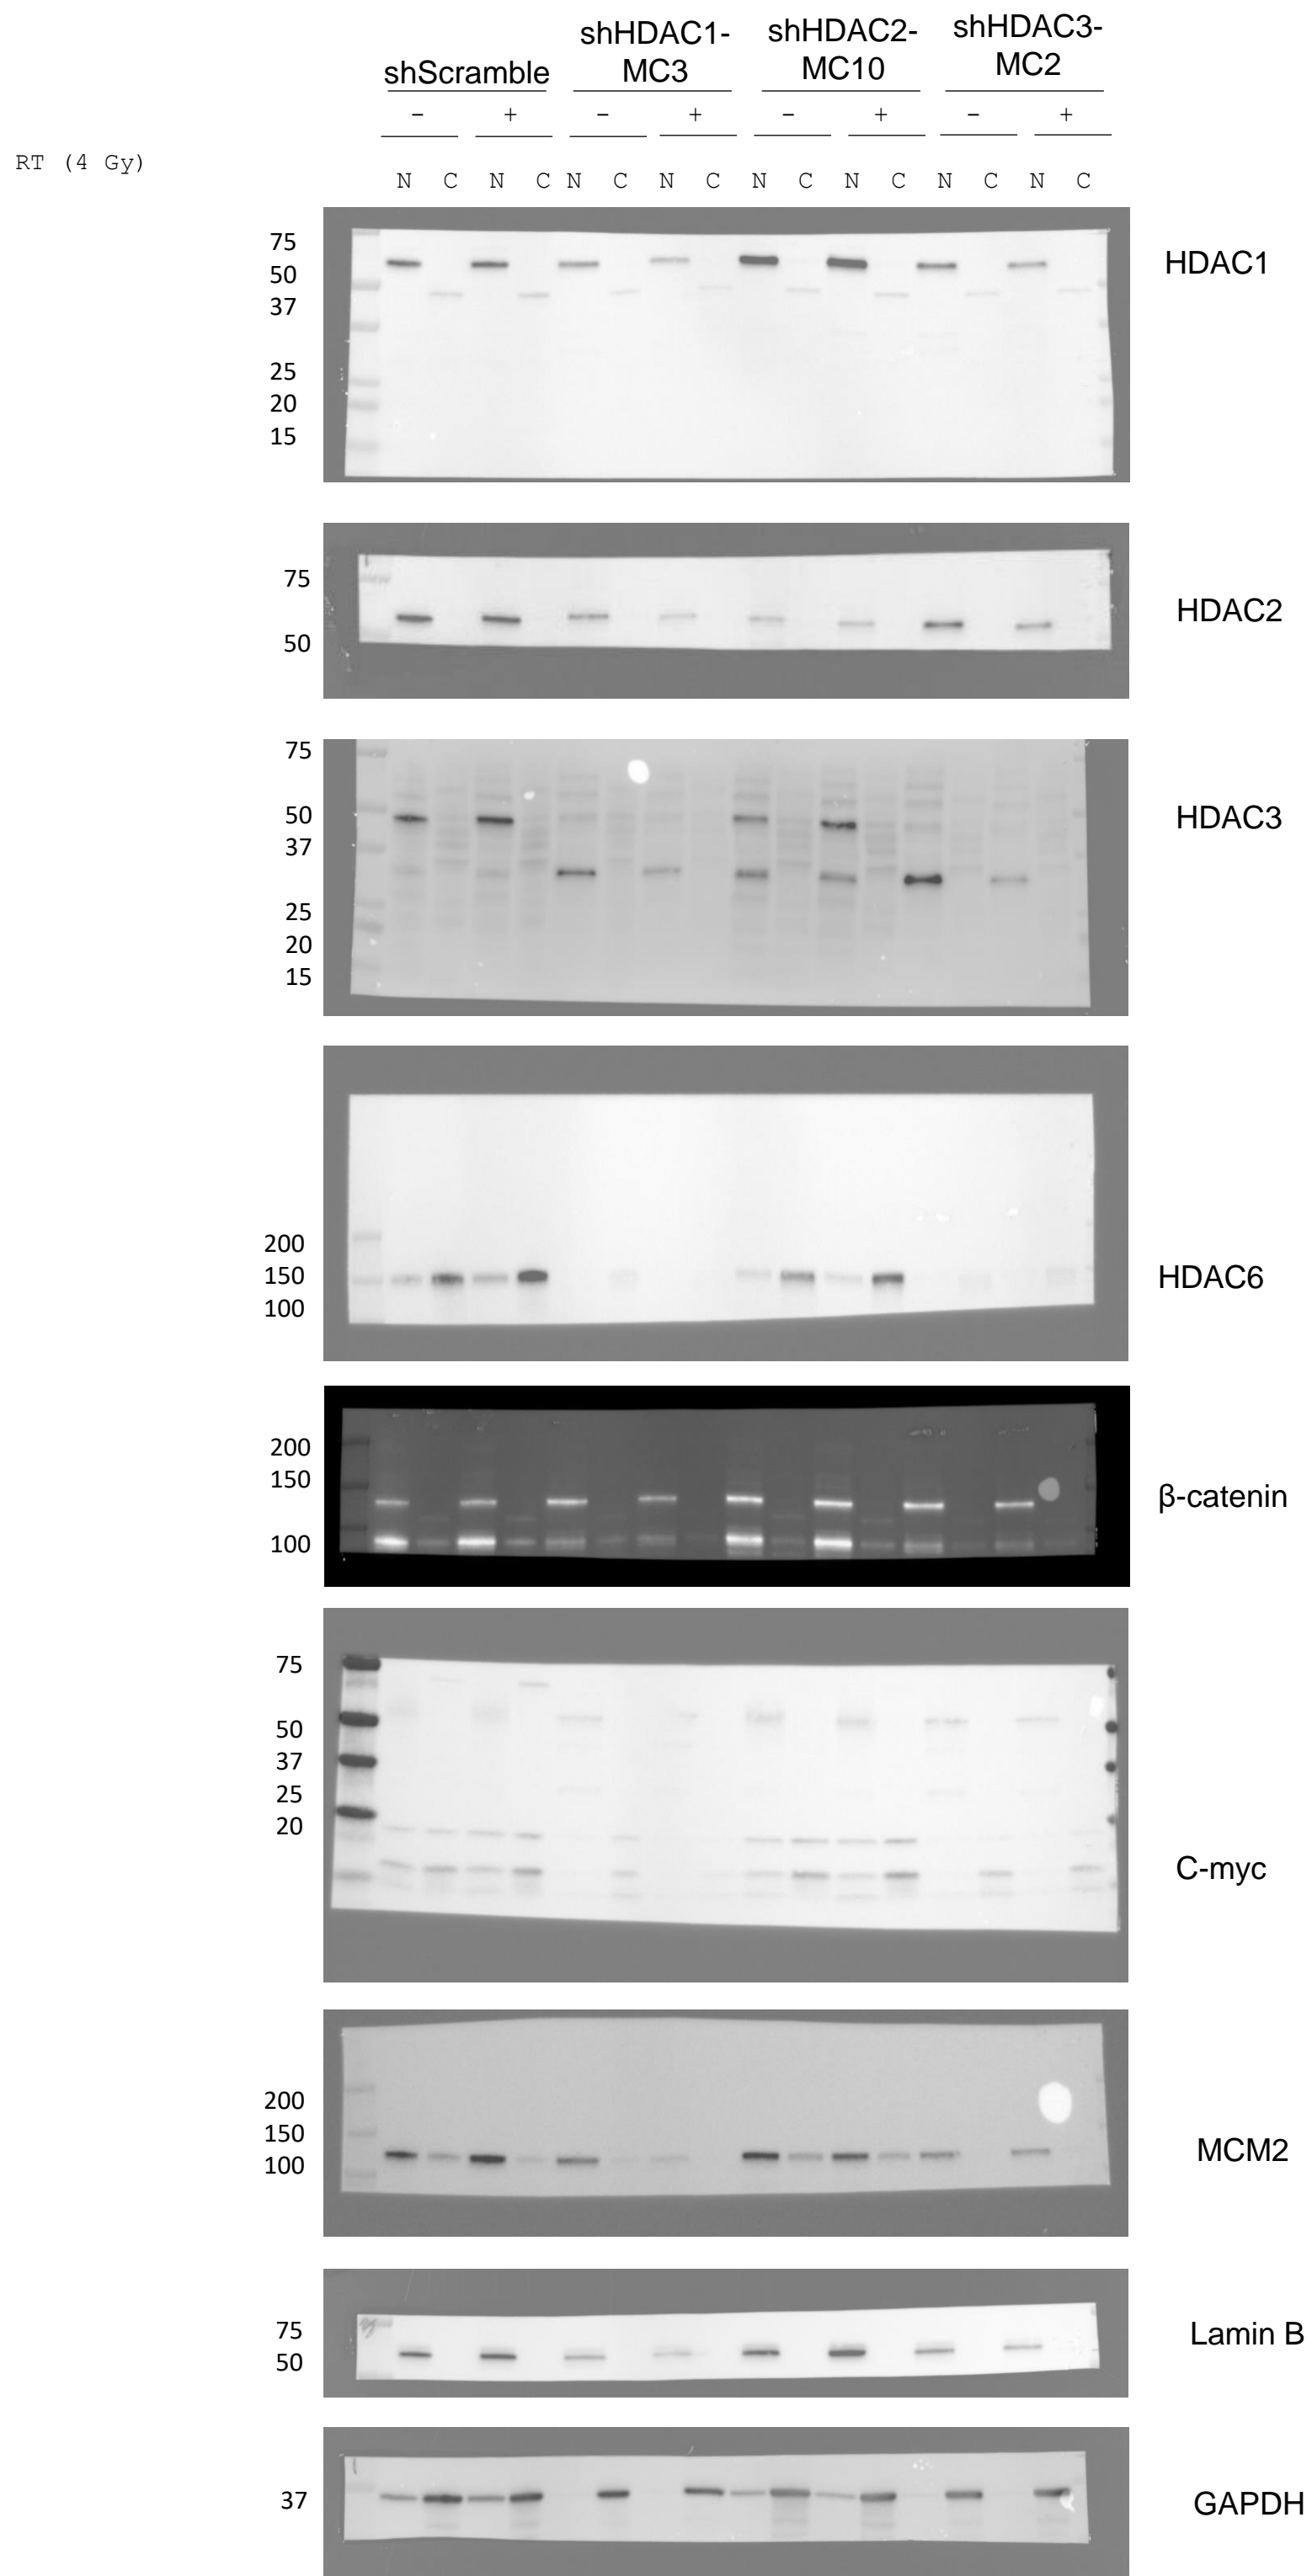

Supplement: mmc2.pdf [file mmc2.pdf]
